# Supplementary material
Source: publisher site journal article supplement (https://www.spandidos-publications.com/6004/downloadSupplementary)
Supplement: Supplementary file 1 [file downloadSupplementary]

## Sheet: Sheet1
Supplementary Table III. Detailed information on DEGs. DEGs: differentially expressed genes.
ID	adj.P.Val	P.Value	t	B	logFC	ORF	Description	GeneName	GSM2064394	GSM2064397	GSM2064402	GSM2064406	GSM2064409	GSM2064413	GSM2064427	GSM2064433	GSM2064435	GSM2064428	GSM2064429	GSM2064432
8115_at	4.77e-07	2.57e-11	-23.0108	14.6195	-4.54186	8115	T-cell leukemia/lymphoma 1A	TCL1A	3.25358	3.76781	4.09185	3.7769	3.20808	4.24328	8.68474	8.00221	8.32689	8.15175	7.90935	8.51774
931_at	1.82e-06	1.97e-10	-19.3495	13.2733	-4.59759	931	membrane-spanning 4-domains, subfamily A, member 1	MS4A1	2.59676	3.33413	3.10301	2.63541	2.47757	2.93663	7.49233	7.73524	7.49779	6.86533	6.83801	8.24035
29760_at	2.3e-05	3.73e-09	-15.0108	11.0375	-3.2775	29760	B-cell linker	BLNK	3.77874	3.55789	3.38852	4.28646	3.49335	3.66718	6.95021	7.31246	7.55427	6.47911	6.33843	7.20266
29802_at	4.93e-05	1.31e-08	-13.4442	9.99163	-3.62287	29802	pre-B lymphocyte 3	VPREB3	2.61771	2.75841	2.97489	2.41914	2.37827	2.8501	7.03268	6.12966	6.18501	6.01541	5.29338	7.07961
5450_at	4.93e-05	1.37e-08	-13.3929	9.9547	-3.96104	5450	POU class 2 associating factor 1	POU2AF1	2.93988	2.12484	2.39158	2.60082	2.343	2.06929	6.82559	6.48738	7.2487	5.68096	5.35075	6.64226
974_at	4.93e-05	1.59e-08	-13.2127	9.82366	-3.15152	974	CD79b molecule, immunoglobulin-associated beta	CD79B	3.39102	4.49277	3.94363	4.01451	4.30331	4.63522	7.99002	7.25577	7.15609	6.76017	6.95158	7.57594
1380_at	0.000101	3.81e-08	-12.2284	9.06658	-1.94684	1380	complement component (3d/Epstein Barr virus) receptor 2	CR2	2.15181	2.44226	2.34317	2.70144	2.59851	2.16908	3.91752	4.19418	4.51577	4.51019	4.07969	4.86995
640_at	0.000111	4.77e-08	-11.9846	8.86771	-2.37192	640	BLK proto-oncogene, Src family tyrosine kinase	BLK	2.33864	2.73837	2.49146	2.24244	2.55194	2.29747	5.3562	5.03216	5.30674	4.34231	4.6237	4.23073
55024_at	0.000124	6.02e-08	-11.7382	8.66178	-3.11852	55024	B-cell scaffold protein with ankyrin repeats 1	BANK1	4.20385	2.66177	2.56475	3.14602	2.90447	2.77192	6.07834	6.44161	6.5044	5.6663	5.80756	6.46569
84824_at	0.000129	6.95e-08	-11.5867	8.5327	-1.4307	84824	Fc receptor-like A	FCRLA	2.50843	2.54821	2.49997	2.47211	2.60798	2.61806	4.26829	4.11424	4.23641	3.69227	3.50626	4.02149
1028_at	0.000144	8.66e-08	-11.3595	8.33537	-2.63722	1028	cyclin-dependent kinase inhibitor 1C (p57, Kip2)	CDKN1C	3.66143	3.79259	3.91502	3.17946	3.35858	3.96223	6.91224	6.63273	5.65628	5.94039	6.70316	5.84783
6169_at	0.000144	9.55e-08	-11.2591	8.24682	-1.00349	6169	ribosomal protein L38	RPL38	7.91347	7.92615	8.15205	7.75731	7.96608	7.82557	9.21869	8.8989	8.93662	8.73765	8.9659	8.8038
55342_at	0.000144	1.01e-07	-11.204	8.19777	-1.85629	55342	spermatid perinuclear RNA binding protein	STRBP	3.45094	3.83246	3.30683	3.40032	3.98566	3.0917	5.41551	5.65114	5.67623	4.98926	5.14547	5.32803
3399_at	0.000153	1.15e-07	-11.0693	8.07689	-3.32377	3399	inhibitor of DNA binding 3, dominant negative helix-loop-helix protein	ID3	3.6948	2.99616	2.46523	2.92517	4.19417	2.62419	7.1691	6.27642	6.75941	6.18853	5.92343	6.52545
3507_at	0.000162	1.38e-07	-10.8888	7.91225	-5.03322	3507	immunoglobulin heavy constant mu		6.09253	4.65353	3.74538	5.33037	3.00687	4.47202	9.57753	9.67284	10.4543	9.10906	8.83578	9.85052
91782_at	0.000162	1.4e-07	-10.8753	7.89982	-1.06238	91782	charged multivesicular body protein 7	CHMP7	5.31926	5.60262	5.4685	5.46845	5.9316	5.554	6.77212	6.50718	6.73739	6.63733	6.4704	6.59428
26228_at	0.000165	1.52e-07	-10.7978	7.82807	-2.40014	26228	signal transducing adaptor family member 1	STAP1	2.86561	2.86046	2.93844	3.03397	3.96917	2.74093	5.80422	5.86769	5.56697	5.27317	4.84778	5.44961
54674_at	0.00019	1.84e-07	-10.6064	7.64862	-4.28012	54674	leucine rich repeat neuronal 3	LRRN3	3.50915	2.98962	2.50873	2.79704	4.67581	2.33846	6.96265	7.57684	8.41443	7.32037	6.51109	7.71412
8754_at	0.00019	1.95e-07	10.5536	7.59844	1.30809	8754	ADAM metallopeptidase domain 9	ADAM9	6.25099	6.66302	6.9879	6.81284	6.22183	6.67148	5.41074	5.34388	5.19623	5.26904	5.25307	5.28658
55332_at	0.000196	2.11e-07	10.4756	7.52393	1.34168	55332	DNA-damage regulated autophagy modulator 1	DRAM1	5.78084	5.86025	6.23954	6.10719	5.67427	5.61809	4.46979	4.80446	4.44963	4.79867	4.43722	4.27033
4054_at	0.000199	2.25e-07	-10.4133	7.46391	-1.19067	4054	latent transforming growth factor beta binding protein 3	LTBP3	3.07312	3.03848	2.85037	2.97029	3.30621	2.90384	4.41233	4.24789	4.32416	4.01345	3.84195	4.44652
6218_at	0.000234	2.78e-07	-10.2145	7.27	-1.31725	6218	ribosomal protein S17	RPS17	10.3939	10.9163	10.5986	10.1962	10.8184	10.8629	12.234	11.9433	11.9956	11.8492	11.775	11.8927
6193_at	0.000247	3.06e-07	-10.1251	7.18149	-1.46358	6193	ribosomal protein S5	RPS5	10.3702	11.1669	10.9033	10.4863	10.5678	10.6638	12.496	12.1873	12.2856	11.928	11.8739	12.1689
6633_at	0.000263	4.16e-07	-9.84079	6.89464	-1.28058	6633	small nuclear ribonucleoprotein D2 polypeptide 16.5kDa	SNRPD2	8.9403	9.75662	9.52258	9.52195	9.46043	9.62378	11.0297	10.6953	10.7738	10.5555	10.872	10.5828
100130733_at	0.000263	4.39e-07	9.79297	6.84557	2.39983	100130733	leucine rich repeat containing 70	LRRC70	5.28479	5.71962	6.61256	4.96305	5.50514	5.53097	3.30022	3.04406	2.86174	3.71614	2.89078	3.40419
26355_at	0.000401	7.02e-07	-9.37414	6.4052	-1.32588	26355	family with sequence similarity 162, member A	FAM162A	5.80539	6.47737	5.99509	6.42748	6.33015	5.87217	7.85995	7.51636	7.5164	7.24958	7.36117	7.35947
7059_at	0.000401	7.17e-07	9.35468	6.38427	1.06394	7059	thrombospondin 3	THBS3	4.06218	3.73544	3.83315	4.09617	3.74287	4.20413	2.53288	2.99036	2.80814	3.14013	2.87924	2.93959
814_at	0.000401	7.36e-07	-9.33264	6.36052	-1.89289	814	calcium/calmodulin-dependent protein kinase IV	CAMK4	2.53694	3.06195	3.12227	2.30013	3.03521	2.41824	4.89069	4.83735	5.11783	4.44788	4.50477	4.03355
60468_at	0.000407	8.08e-07	-9.25128	6.27235	-1.87437	60468	BTB and CNC homology 1, basic leucine zipper transcription factor 2	BACH2	2.02717	2.35853	2.39271	2.32607	2.59814	2.13182	4.36937	4.56017	4.76176	4.20621	3.52528	3.6579
9338_at	0.000412	8.45e-07	-9.21221	6.22976	-1.43875	9338	transcription elongation factor A (SII)-like 1	TCEAL1	4.9322	5.37074	4.64299	5.145	5.35242	5.20253	6.98586	6.54868	6.71122	6.09369	6.48159	6.45734
84924_at	0.000415	8.73e-07	-9.18362	6.19847	-1.19159	84924	zinc finger protein 566	ZNF566	2.81118	2.80346	2.6945	2.5087	2.95731	2.40607	3.97213	4.19566	3.93941	3.69936	3.47318	4.05102
3615_at	0.000416	8.97e-07	-9.16056	6.17316	-1.40474	3615	IMP (inosine 5'-monophosphate) dehydrogenase 2	IMPDH2	6.57759	7.09919	6.64738	6.87278	7.0683	7.21058	8.77592	8.46994	8.40931	8.06133	7.93189	8.25586
116369_at	0.000459	1.06e-06	9.01479	6.01182	2.93712	116369	solute carrier family 26 (anion exchanger), member 8	SLC26A8	4.37545	6.27849	6.68817	5.75489	6.23857	6.10522	2.70869	2.45532	3.19083	3.2221	3.21494	3.02619
55422_at	0.00053	1.26e-06	-8.87329	5.85283	-1.07903	55422	zinc finger protein 331	ZNF331	3.21192	3.89098	3.58174	3.25726	3.67583	3.22996	4.57481	4.61009	4.50754	4.4161	4.45637	4.75697
157285_at	0.000538	1.31e-06	-8.83779	5.81257	-1.78478	157285	homolog of rat pragma of Rnd2	PRAG1	6.28682	5.82366	5.27773	5.74865	5.9399	5.26556	8.03074	7.53566	7.82998	7.18249	7.22034	7.25181
57134_at	0.000541	1.44e-06	-8.7619	5.726	-1.3637	57134	mannosidase, alpha, class 1C, member 1	MAN1C1	3.09658	2.601	2.55223	2.73095	3.18142	2.64609	4.53753	4.3189	4.05879	4.14675	3.64804	4.28044
50854_at	0.000541	1.44e-06	-8.76186	5.72596	-1.36105	50854	chromosome 6 open reading frame 48		8.58131	9.22741	8.95644	8.65639	8.50957	8.99437	10.6856	10.1653	10.3184	10.0622	9.87843	9.9819
10211_at	0.000541	1.45e-06	8.75178	5.7144	1.32619	10211	flotillin 1	FLOT1	8.06493	8.78875	8.93072	8.71183	8.9766	8.91062	7.22642	7.24826	7.48902	7.74797	7.41426	7.30039
6194_at	0.000541	1.46e-06	-8.74863	5.7108	-1.20427	6194	ribosomal protein S6	RPS6	10.743	11.4807	11.1568	11.0471	10.9225	10.8909	12.6576	12.41	12.1977	12.0565	12.08	12.0648
80315_at	0.000542	1.56e-06	8.69148	5.64506	1.04428	80315	cytoplasmic polyadenylation element binding protein 4	CPEB4	7.75726	7.69551	7.8475	7.78853	8.07146	7.48354	6.5396	6.72332	6.4715	7.14893	6.75463	6.74012
51027_at	0.000542	1.58e-06	-8.6831	5.63539	-1.0436	51027	bolA family member 1	BOLA1	3.86998	4.32231	3.98601	4.3649	3.94727	4.06917	5.44469	4.92776	5.13589	4.86447	5.34064	5.10781
256051_at	0.000542	1.59e-06	-8.67564	5.62677	-1.3952	256051	zinc finger protein 549	ZNF549	3.34903	3.81432	3.42666	3.03405	3.8579	2.87706	4.92661	4.90364	4.86762	4.62743	4.64955	4.75539
3684_at	0.000542	1.62e-06	8.6599	5.60856	1.25968	3684	integrin, alpha M (complement component 3 receptor 3 subunit)	ITGAM	9.3528	9.95297	10.0724	9.95915	9.42052	10.0794	8.37192	8.53455	8.52575	8.89033	8.52055	8.43608
83999_at	0.000542	1.65e-06	8.64642	5.59295	2.02159	83999	kringle containing transmembrane protein 1	KREMEN1	4.32168	5.6117	5.22972	5.19275	5.75765	5.70355	3.29567	3.17028	3.50548	3.7584	2.97505	2.98261
2242_at	0.000542	1.67e-06	8.63855	5.58382	1.22741	2242	FES proto-oncogene, tyrosine kinase	FES	7.33385	7.28099	7.7161	7.65617	7.72543	7.81636	5.86912	6.36683	6.57423	6.70207	6.24037	6.41183
1628_at	0.000577	1.87e-06	-8.54573	5.47562	-1.29431	1628	D site of albumin promoter (albumin D-box) binding protein	DBP	3.2127	3.45652	3.13171	3.86204	3.30187	3.20224	5.21529	4.54959	4.45423	4.50576	4.6904	4.51765
8569_at	0.000607	2.06e-06	8.46492	5.38054	1.61495	8569	MAP kinase interacting serine/threonine kinase 1	MKNK1	5.4176	5.67903	5.87748	5.47907	6.38011	5.7981	3.71054	4.23007	4.21938	4.53963	3.73518	4.50688
114915_at	0.000649	2.24e-06	-8.39698	5.29999	-1.57543	114915	EPB41L4A antisense RNA 1		6.59683	7.12301	6.70224	6.3624	6.47631	6.12654	8.85124	7.91313	8.02306	8.11692	8.04024	7.89529
1230_at	0.000664	2.33e-06	8.36702	5.26428	1.94436	1230	chemokine (C-C motif) receptor 1	CCR1	8.60472	8.72332	9.07791	8.51226	9.90675	8.69202	6.94162	7.15961	6.39937	7.09245	7.36319	6.89455
5425_at	0.000703	2.55e-06	-8.29184	5.17417	-1.25908	5425	polymerase (DNA directed), delta 2, accessory subunit	POLD2	4.53215	5.37695	4.94342	4.99386	5.30619	5.05397	6.74469	6.09585	6.39861	6.04459	6.23823	6.23909
817_at	0.000703	2.6e-06	-8.27825	5.15782	-1.08228	817	calcium/calmodulin-dependent protein kinase II delta	CAMK2D	3.31635	4.18716	3.70013	3.94013	3.56555	3.45864	4.79845	4.77116	4.75664	4.78759	4.63118	4.91661
2531_at	0.000703	2.63e-06	-8.26908	5.14676	-1.20633	2531	3-ketodihydrosphingosine reductase	KDSR	4.05026	4.39194	4.15475	4.19987	4.59045	4.0795	5.96355	5.52559	5.55676	5.04736	5.37771	5.2338
1879_at	0.000703	2.71e-06	-8.24472	5.11734	-1.23585	1879	early B-cell factor 1	EBF1	2.1815	2.23817	2.20388	2.11195	2.19449	2.35028	3.78576	3.85765	3.46834	3.06521	2.92532	3.59311
79161_at	0.000703	2.72e-06	-8.24152	5.11348	-1.32971	79161	transmembrane protein 243, mitochondrial	TMEM243	6.90056	7.05564	6.43301	6.90075	7.2055	6.97803	8.88292	8.18588	8.23085	8.01492	7.97858	8.1586
84417_at	0.000703	2.79e-06	-8.22032	5.0878	-1.20488	84417	chromosome 2 open reading frame 40	ECRG4	2.83546	2.30329	2.28195	2.26269	2.64854	2.13461	3.99603	3.45893	3.91938	3.41274	3.43591	3.47282
4345_at	0.000703	2.79e-06	-8.22019	5.08765	-1.46887	4345	CD200 molecule	CD200	2.61565	2.04087	2.10011	2.3071	2.27898	2.14448	4.17104	4.13646	3.34261	3.48289	3.21766	3.94977
84674_at	0.000703	2.8e-06	8.21745	5.08432	1.03859	84674	caspase recruitment domain family, member 6	CARD6	3.73721	4.053	3.99027	4.37639	4.36347	4.43581	2.90184	3.14877	3.35676	3.18405	3.17186	2.96135
26751_at	0.000705	2.85e-06	-8.20449	5.0686	-1.89809	26751	SH3 and SYLF domain containing 1	SH3YL1	3.16379	3.41041	3.23777	3.16882	3.19792	2.72672	5.57587	4.06313	5.03941	4.81238	5.22371	5.5795
121512_at	0.000713	2.92e-06	8.18447	5.04426	1.12994	121512	FYVE, RhoGEF and PH domain containing 4	FGD4	3.93885	4.17466	4.70612	4.49793	4.31889	4.49554	2.93034	3.24499	3.05182	3.57009	3.37463	3.18046
6932_at	0.000787	3.35e-06	-8.07675	4.91243	-1.94255	6932	transcription factor 7 (T-cell specific, HMG-box)	TCF7	3.20765	3.66886	3.26364	2.73191	4.20289	2.58182	5.38951	5.10189	5.4822	5.13499	4.89158	5.31192
10591_at	0.000852	3.73e-06	-7.99252	4.8083	-1.31962	10591	2'-deoxynucleoside 5'-phosphate N-hydrolase 1	DNPH1	5.82757	6.40166	5.69281	6.12048	6.46751	6.28569	7.75093	7.45623	7.6799	7.11707	7.6376	7.07172
2308_at	0.000852	3.82e-06	-7.97416	4.78548	-1.07947	2308	forkhead box O1	FOXO1	5.32947	5.48431	5.20081	4.94633	5.5675	5.06522	6.6597	6.27543	6.45751	6.43267	5.90798	6.33717
25842_at	0.000852	3.85e-06	-7.96725	4.77688	-1.32481	25842	anti-silencing function 1A histone chaperone	ASF1A	5.30558	5.97508	5.61326	5.64724	5.78822	4.93236	7.30141	6.79139	6.80837	6.64912	6.80505	6.85525
85315_at	0.000852	3.86e-06	-7.96546	4.77466	-1.25278	85315	progestin and adipoQ receptor family member VIII	PAQR8	5.67632	6.08387	5.50944	6.08148	5.9977	5.59225	7.64731	6.9982	7.22728	6.91387	6.84763	6.82345
9045_at	0.000852	4.02e-06	-7.93443	4.73595	-1.11553	9045	ribosomal protein L14	RPL14	10.5043	11.1712	10.8463	10.6032	10.5334	11.1151	12.2341	12.0467	11.9522	11.6526	11.7877	11.7933
6141_at	0.000852	4.04e-06	-7.92994	4.73033	-1.16835	6141	ribosomal protein L18	RPL18	10.209	10.6459	10.2504	10.4452	10.264	10.795	12.0341	11.7763	11.6325	11.3884	11.1843	11.604
1235_at	0.000852	4.1e-06	-7.91979	4.71764	-1.98511	1235	chemokine (C-C motif) receptor 6	CCR6	2.73381	2.50691	2.29164	2.74856	3.76125	2.35632	5.12881	4.93568	4.69385	4.26109	4.23902	5.05068
839_at	0.000852	4.12e-06	-7.91617	4.71311	-1.00186	839	caspase 6, apoptosis-related cysteine peptidase	CASP6	5.24955	5.28636	5.07863	5.14947	5.39958	4.99508	6.52625	6.21733	6.42209	5.73629	6.00569	6.26217
3899_at	0.000852	4.13e-06	-7.91298	4.70911	-1.18153	3899	AF4/FMR2 family, member 3	AFF3	2.44764	2.35943	2.30088	2.55087	2.31041	2.63831	3.35041	4.25649	3.22905	3.49592	3.6795	3.68537
3945_at	0.000882	4.49e-06	-7.84888	4.62858	-1.56693	3945	lactate dehydrogenase B	LDHB	9.73192	10.7677	10.1086	9.67281	10.5447	9.71938	11.8703	11.6505	11.999	11.4735	11.3916	11.562
55326_at	0.000882	4.58e-06	-7.8336	4.6093	-1.22418	55326	1-acylglycerol-3-phosphate O-acyltransferase 5	AGPAT5	3.98164	4.35618	3.76475	4.12706	4.10795	3.78785	5.601	5.50022	5.42727	4.84281	4.81646	5.28278
28691_at	0.000882	4.72e-06	-7.81103	4.58076	-1.40936	28691	T cell receptor alpha variable 2		2.48161	2.52774	2.28662	2.27935	2.85162	2.15085	4.45173	3.29468	4.06767	3.74786	3.5723	3.89969
2053_at	0.000882	4.77e-06	-7.80212	4.56948	-1.9874	2053	epoxide hydrolase 2, cytoplasmic	EPHX2	3.09418	3.20628	3.0489	2.81662	4.04417	2.5414	5.62935	4.78283	5.37375	5.41169	4.43999	5.03835
132160_at	0.000882	4.8e-06	7.79807	4.56434	1.0304	132160	protein phosphatase, Mg2+/Mn2+ dependent, 1M	PPM1M	6.59733	7.23209	7.48677	7.17047	6.84399	7.05629	5.95394	5.955	5.99829	6.27608	6.09773	5.92352
3112_at	0.000882	4.86e-06	-7.78868	4.55244	-1.11916	3112	major histocompatibility complex, class II, DO beta	HLA-DOB	2.49864	2.20106	2.58148	2.50708	2.52515	2.34139	3.91825	3.73465	3.52682	3.3898	2.98394	3.8163
126014_at	0.000882	4.9e-06	7.7828	4.54497	1.16341	126014	osteoclast associated, immunoglobulin-like receptor	OSCAR	7.27509	7.46466	8.03845	7.85949	7.19006	7.54325	6.37835	6.34064	6.59018	6.46216	6.57735	6.04182
79752_at	0.000965	5.46e-06	-7.69952	4.43879	-1.20182	79752	zinc finger, AN1-type domain 1	ZFAND1	4.88628	4.9398	4.60917	4.85664	4.50236	4.38445	6.53174	5.90346	5.59651	5.89488	5.65722	5.80579
151888_at	0.000965	5.56e-06	-7.6862	4.42172	-2.29296	151888	B and T lymphocyte associated	BTLA	2.98014	3.83663	2.90273	2.71074	3.40707	1.8337	5.77046	5.30028	5.47681	4.68372	4.81262	5.38488
55799_at	0.000965	5.6e-06	-7.68077	4.41474	-1.93432	55799	calcium channel, voltage-dependent, alpha 2/delta subunit 3	CACNA2D3	4.03804	2.56058	2.843	3.22538	2.63285	3.48017	5.26951	5.21123	5.15383	4.49352	5.458	4.79982
57820_at	0.000981	5.78e-06	-7.65665	4.38376	-1.58902	57820	cyclin B1 interacting protein 1, E3 ubiquitin protein ligase	CCNB1IP1	5.61392	6.80366	6.48536	6.2223	5.87372	5.96706	8.35817	7.56045	7.67655	7.37884	7.70342	7.82271
8089_at	0.000981	5.87e-06	-7.64496	4.3687	-1.41538	8089	YEATS domain containing 4	YEATS4	3.78523	4.00215	3.61986	4.39132	4.28779	3.42045	5.81848	5.5562	5.08724	5.34342	5.11842	5.07532
5037_at	0.000981	5.93e-06	-7.63772	4.35938	-1.81257	5037	phosphatidylethanolamine binding protein 1	PEBP1	5.53237	6.90277	6.26286	5.80885	6.80861	5.78637	8.37858	7.80541	8.25521	7.75238	7.82533	7.96035
121053_at	0.000981	6.03e-06	-7.62492	4.34286	-1.44722	121053	chromosome 12 open reading frame 45	NOPCHAP1	4.54866	5.26968	4.58844	5.25441	5.12797	5.34691	7.0746	6.31467	6.55914	6.18269	6.55329	6.13501
27292_at	0.00101	6.39e-06	-7.58112	4.28619	-1.0658	27292	DIM1 dimethyladenosine transferase 1 homolog (S. cerevisiae)	DIMT1	5.02709	5.63212	5.17211	5.19788	5.09536	4.89661	6.6063	6.31979	6.28216	5.79982	6.24205	6.16584
9975_at	0.00101	6.43e-06	-7.57651	4.28022	-1.25628	9975	nuclear receptor subfamily 1, group D, member 2	NR1D2	3.33843	3.52884	3.08749	3.51807	3.58052	2.65852	4.6622	4.90087	4.49769	4.26079	4.64239	4.2856
57568_at	0.00101	6.48e-06	7.57045	4.27235	2.27706	57568	signal-induced proliferation-associated 1 like 2	SIPA1L2	6.86408	7.88566	7.6955	7.6954	8.25691	8.30301	4.78595	5.39727	5.6469	6.59831	5.20654	5.40321
56160_at	0.00102	6.7e-06	-7.54503	4.2393	-1.26424	56160	necdin-like 2	NSMCE3	6.55615	6.82054	6.55129	5.7916	6.28501	6.1104	7.93873	7.76419	7.51829	7.27598	7.48529	7.71797
5226_at	0.00102	6.72e-06	7.54382	4.23773	1.3523	5226	phosphogluconate dehydrogenase	PGD	10.2704	10.5633	10.9266	10.7737	9.64584	10.2674	9.04631	8.95304	9.13558	9.22268	8.95231	9.02342
9605_at	0.00102	6.76e-06	7.5384	4.23067	1.83557	9605	VPS9 domain containing 1	VPS9D1	6.45613	7.36964	7.40531	6.06923	6.88503	6.83613	4.40139	5.07601	5.45357	5.29401	4.71836	5.0647
140809_at	0.00102	6.8e-06	7.53474	4.22591	1.42188	140809	sulfiredoxin 1	SRXN1	9.4533	9.01341	8.9406	8.83146	9.08164	9.12488	6.99813	8.30114	7.67453	7.93765	7.3888	7.61377
220929_at	0.00102	6.8e-06	7.53429	4.22532	2.13294	220929	zinc finger protein 438	ZNF438	6.07903	7.15018	7.57966	6.74232	7.37317	7.30651	4.36111	4.84164	4.92243	5.81695	5.02479	4.4663
8761_at	0.00105	7.06e-06	-7.50587	4.18822	-1.29927	8761	poly(A) binding protein, cytoplasmic 4 (inducible form)	PABPC4	6.50302	6.36616	6.21881	7.09622	6.63003	7.24085	7.97891	8.14631	8.08561	7.6369	7.86976	8.13323
54543_at	0.00106	7.29e-06	-7.48244	4.15756	-1.07522	54543	translocase of outer mitochondrial membrane 7 homolog (yeast)	TOMM7	10.3321	11.087	10.8146	10.9723	10.6859	10.7929	12.2536	11.8972	12.0183	11.7677	11.4971	11.7022
3033_at	0.00106	7.32e-06	-7.47924	4.15337	-1.16654	3033	hydroxyacyl-CoA dehydrogenase	HADH	5.49917	6.08907	5.71319	5.86766	5.59724	5.35664	7.30132	6.82008	6.95967	6.44271	6.59159	7.00687
959_at	0.00107	7.53e-06	-7.4581	4.12563	-1.46031	959	CD40 ligand	CD40LG	2.80705	2.64479	2.70527	2.38962	3.37545	2.3101	4.6049	4.06443	4.50019	3.81093	3.76529	4.24839
2629_at	0.00108	7.79e-06	7.4333	4.093	1.6174	2629	glucosidase, beta, acid	GBA	7.24863	7.94845	8.60708	8.14396	7.52773	7.26645	5.91728	6.09547	6.0005	6.40745	6.25739	6.35982
257144_at	0.0011	8.1e-06	-7.40395	4.05429	-1.82565	257144	germinal center-associated, signaling and motility	GCSAM	2.99965	3.5941	3.1577	2.37669	3.53497	2.2841	5.25453	5.04655	5.02615	4.53613	4.39902	4.63873
91689_at	0.0011	8.22e-06	-7.39353	4.04051	-1.18645	91689	single-pass membrane protein with aspartate-rich tail 1	SMDT1	5.48913	5.79077	5.61188	5.75422	5.18626	5.76678	7.43502	6.71754	6.44064	6.60067	6.86278	6.66108
64172_at	0.00112	8.47e-06	-7.37162	4.0115	-1.34011	64172	O-sialoglycoprotein endopeptidase-like 1	OSGEPL1	2.74535	3.43051	3.24302	3.06433	2.94675	2.3358	4.56837	4.39306	4.33677	3.8963	4.03877	4.57312
7791_at	0.00112	8.52e-06	7.36747	4.00599	1.07231	7791	zyxin	ZYX	7.26161	7.11615	7.07989	7.58485	7.54885	7.69072	6.15747	6.16506	6.08431	6.80807	6.42557	6.20775
26009_at	0.00112	8.55e-06	-7.3646	4.00219	-1.23983	26009	zinc finger, ZZ-type containing 3	ZZZ3	4.21577	5.2224	4.49032	4.83458	4.42589	4.59278	6.23996	5.89537	6.08014	5.56144	5.62579	5.818
5509_at	0.00113	8.81e-06	7.34281	3.97325	1.27546	5509	protein phosphatase 1, regulatory subunit 3D	PPP1R3D	5.9105	6.75926	6.78903	6.52576	6.81429	6.22996	4.99034	5.00679	5.05475	5.68453	5.29687	5.34278
25926_at	0.00115	8.98e-06	-7.32798	3.95352	-1.15069	25926	nucleolar protein 11	NOL11	5.80483	6.81597	6.31158	6.20936	6.18463	6.19449	7.71425	7.46327	7.54623	7.05282	7.17272	7.47571
90843_at	0.00118	9.61e-06	-7.27906	3.88819	-1.02485	90843	transcription elongation factor A (SII)-like 8	TCEAL8	5.97101	6.5321	6.13678	6.4288	6.49069	5.9979	7.75505	7.35888	7.23521	7.06279	7.24546	7.04898
51100_at	0.00118	9.61e-06	7.27855	3.88751	1.03397	51100	SH3-domain GRB2-like endophilin B1	SH3GLB1	9.11427	9.76032	9.62132	9.75554	9.47995	9.64177	8.20008	8.66366	8.35881	8.98435	8.40874	8.55372
221830_at	0.00119	9.73e-06	-7.26959	3.8755	-1.01943	221830	TWIST neighbor	POLR1F	4.40297	5.40676	5.08046	4.84789	5.12368	4.93324	6.21029	6.04057	6.00266	5.83914	5.87879	5.94015
171425_at	0.00119	9.9e-06	-7.25692	3.85852	-1.08688	171425	citrate lyase beta like	CLYBL	2.50359	3.32078	2.98507	2.96756	2.91994	2.72595	4.43992	3.9034	3.92308	3.75155	3.73558	4.1906
2153_at	0.00119	9.91e-06	7.25618	3.85752	1.97556	2153	coagulation factor V (proaccelerin, labile factor)	F5	7.30401	8.09087	8.4117	7.89796	6.77834	7.84473	5.21476	5.78233	5.74557	6.34648	6.04326	5.34187
3512_at	0.00122	1.02e-05	-7.23406	3.8278	-5.22625	3512	immunoglobulin J polypeptide, linker protein for immunoglobulin alpha and mu polypeptides	JCHAIN	6.72448	3.01658	3.41971	5.17784	3.01588	3.13779	9.32698	9.43702	11.2463	8.71658	7.62355	9.49936
643224_at	0.00125	1.08e-05	7.19128	3.77014	1.02176	643224	tubulin, beta pseudogene 5		2.91932	3.45484	3.25402	3.05527	3.32754	3.69436	2.61416	2.43551	2.07483	2.26137	1.95151	2.23739
394_at	0.00125	1.1e-05	-7.18065	3.75577	-1.14372	394	Rho GTPase activating protein 5	ARHGAP5	2.8319	2.9477	2.46664	2.61016	3.04281	2.52237	4.44877	4.09916	3.72936	3.84274	3.54067	3.62318
55013_at	0.00125	1.11e-05	-7.17614	3.74967	-1.08604	55013	coiled-coil domain containing 109B	MCUB	5.48021	5.70687	5.10054	5.8939	5.29	5.88507	7.01837	6.66207	6.75558	6.4342	6.46168	6.54096
79731_at	0.00132	1.19e-05	-7.12117	3.67507	-1.68673	79731	asparaginyl-tRNA synthetase 2, mitochondrial (putative)	NARS2	4.07697	5.2297	4.54978	4.82662	3.96659	4.9336	6.93228	6.2696	6.41701	5.80193	6.0399	6.24291
6146_at	0.00132	1.21e-05	-7.11361	3.66477	-1.35953	6146	ribosomal protein L22	RPL22	8.61165	9.62505	9.10339	9.09891	9.0152	9.73584	11.0607	10.6206	10.5991	10.2954	10.3254	10.446
5580_at	0.00137	1.28e-05	7.07325	3.60968	1.10251	5580	protein kinase C, delta	PRKCD	8.41269	8.01102	8.01311	8.66595	8.51974	8.61264	6.78869	7.28085	7.49941	7.56991	7.33316	7.14807
1875_at	0.00138	1.29e-05	-7.06549	3.59906	-2.76366	1875	E2F transcription factor 5, p130-binding	E2F5	2.82629	4.75615	3.60912	2.68526	2.5951	2.31123	6.44909	5.95511	6.47134	5.37274	5.23965	5.87718
165_at	0.00139	1.35e-05	-7.03452	3.5566	-1.1555	165	AE binding protein 1	AEBP1	3.6908	2.98468	3.28752	3.22281	3.74352	3.07335	4.74342	4.79737	4.4065	4.29931	4.05022	4.63885
230_at	0.00139	1.37e-05	-7.024	3.54215	-1.07093	230	aldolase C, fructose-bisphosphate	ALDOC	4.47449	4.20437	4.10004	4.08504	4.46636	3.5808	5.62174	4.95891	5.26551	5.19625	5.13209	5.16218
28986_at	0.00142	1.42e-05	-6.99947	3.50837	-1.60552	28986	melanoma antigen family H, 1	MAGEH1	4.42053	5.42535	4.642	3.87972	4.61636	4.18597	6.60557	6.00757	6.42354	5.93836	5.84253	5.98547
79623_at	0.00142	1.44e-05	6.98838	3.49307	2.86711	79623	polypeptide N-acetylgalactosaminyltransferase 14	GALNT14	3.38227	6.00068	6.07427	5.83531	5.16006	6.13258	2.32498	2.22349	2.49492	2.88561	2.62703	2.8265
4609_at	0.00142	1.46e-05	-6.97698	3.47734	-1.66733	4609	v-myc avian myelocytomatosis viral oncogene homolog	MYC	6.76008	8.54591	8.06873	7.54943	7.65958	7.71095	9.65361	9.59108	9.45105	9.14864	9.12223	9.33207
9324_at	0.00142	1.46e-05	-6.97685	3.47715	-1.43676	9324	high mobility group nucleosomal binding domain 3	HMGN3	4.75513	4.31599	4.70851	4.39372	3.95627	4.79271	5.65219	5.94553	6.37179	5.30531	5.82257	6.44549
6160_at	0.00142	1.47e-05	-6.97349	3.47251	-1.16214	6160	ribosomal protein L31	RPL31	6.75113	7.01338	6.92407	6.88714	6.94096	7.40254	8.84389	7.95656	8.07338	7.88376	8.2808	7.85367
328_at	0.00142	1.47e-05	-6.97338	3.47236	-1.15705	328	APEX nuclease (multifunctional DNA repair enzyme) 1	APEX1	7.69885	8.26733	7.95102	8.48214	7.67916	8.43756	9.50063	9.33228	9.20113	8.7931	9.33595	9.29529
7163_at	0.00142	1.47e-05	-6.97101	3.46909	-1.77637	7163	tumor protein D52	TPD52	2.84871	3.70425	3.34252	2.93348	3.30918	2.34819	5.30407	4.99626	5.43354	4.2491	4.36675	4.79482
8291_at	0.00144	1.5e-05	6.95994	3.45376	2.17688	8291	dysferlin	DYSF	8.4437	9.54952	9.68007	9.21187	8.97961	9.67516	6.0441	6.82765	7.3017	8.12645	7.17101	7.00777
6138_at	0.00144	1.51e-05	-6.95549	3.44761	-1.1119	6138	ribosomal protein L15	RPL15	9.1411	9.52103	9.17733	9.65354	8.96571	9.63125	10.9221	10.647	10.4639	10.122	10.1766	10.4297
10099_at	0.00144	1.54e-05	-6.94005	3.4262	-1.6998	10099	tetraspanin 3	TSPAN3	5.19688	5.65249	5.20282	5.94911	4.43957	6.06065	7.32675	7.40115	7.16247	6.71824	6.97501	7.11672
7597_at	0.00148	1.59e-05	-6.91783	3.39535	-1.28898	7597	zinc finger and BTB domain containing 25	ZBTB25	2.82977	3.30555	2.87719	2.43771	3.21297	2.42067	4.27348	4.11199	4.70484	3.92415	3.85779	3.94548
1432_at	0.00148	1.6e-05	6.91422	3.39033	1.65967	1432	mitogen-activated protein kinase 14	MAPK14	6.85571	8.17619	8.41117	8.01239	7.81373	7.99228	5.93649	6.35162	6.2231	6.80611	5.88072	6.10544
23642_at	0.00148	1.6e-05	-6.91096	3.3858	-1.05085	23642	small nucleolar RNA host gene 1 (non-protein coding)		2.75664	3.01658	3.24083	3.06271	2.84208	2.66741	4.34735	4.22425	4.16045	3.50303	3.67245	3.98379
9326_at	0.00152	1.67e-05	-6.88401	3.34825	-1.01601	9326	zinc finger, HIT-type containing 3	ZNHIT3	6.32292	6.83165	6.1706	6.48782	6.80916	6.33339	8.03018	7.41051	7.32639	7.51276	7.31043	7.46131
84067_at	0.00163	1.84e-05	6.81253	3.24815	1.44721	84067	family with sequence similarity 160, member A2	FHIP1B	6.53261	7.14687	7.6922	7.39016	6.67604	7.75237	5.59328	5.73367	6.1076	5.65767	5.48269	5.93207
6947_at	0.00166	1.91e-05	6.78717	3.21247	3.6325	6947	transcobalamin I (vitamin B12 binding protein, R binder family)	TCN1	8.98427	9.86371	10.8643	11.7012	8.37971	8.86061	6.92	5.26266	5.65134	6.00747	6.33072	6.68666
440503_at	0.00166	1.91e-05	6.78614	3.21101	1.26463	440503	perilipin 5	PLIN5	5.45953	6.46399	6.28856	6.35785	6.17285	6.49785	4.34856	5.05222	5.16895	5.1303	5.0159	4.93693
6125_at	0.00166	1.92e-05	-6.78306	3.20668	-1.0102	6125	ribosomal protein L5	RPL5	10.3418	10.6669	10.2031	10.3492	10.1593	10.6609	11.7485	11.6789	11.6077	11.0626	11.3176	11.027
23001_at	0.00166	1.94e-05	6.7753	3.19573	1.76113	23001	WD repeat and FYVE domain containing 3	WDFY3	6.24805	6.62673	6.83172	6.86083	6.94512	6.96066	4.02634	5.31211	5.17388	5.89702	4.81255	4.6844
126259_at	0.00178	2.13e-05	-6.71218	3.10637	-1.21031	126259	transmembrane and immunoglobulin domain containing 2	TMIGD2	2.52017	3.05507	2.9844	2.89758	3.15702	2.85226	4.77363	3.70594	4.42655	3.88938	4.16736	3.76552
112487_at	0.00178	2.15e-05	-6.70561	3.09704	-1.14111	112487	D-tyrosyl-tRNA deacylase 2 (putative)	DTD2	4.91701	5.60148	5.17576	4.94766	4.66468	4.93224	6.73457	6.05751	5.79063	6.15751	6.21646	6.1288
51650_at	0.00178	2.16e-05	-6.70246	3.09256	-1.03999	51650	mitochondrial ribosomal protein S33	MRPS33	6.15947	7.13881	6.72963	6.92844	6.757	6.51385	8.09611	7.62752	7.90155	7.55519	7.54752	7.7393
26873_at	0.00178	2.16e-05	6.70082	3.09023	2.52784	26873	5-oxoprolinase (ATP-hydrolysing)	OPLAH	4.86231	6.82129	6.88597	5.8187	4.8644	6.79554	3.2685	3.71132	3.84341	3.3962	3.54247	3.11929
29997_at	0.00178	2.18e-05	-6.69527	3.08234	-1.02559	29997	glioma tumor suppressor candidate region gene 2	NOP53	11.0043	12.0182	11.4644	11.2563	11.721	11.794	12.7264	12.6593	12.5828	12.5383	12.3302	12.5746
7267_at	0.0018	2.24e-05	-6.67846	3.0584	-1.04171	7267	tetratricopeptide repeat domain 3	TTC3	4.23509	4.97247	4.74794	4.72734	4.68356	4.54501	5.32218	5.99248	6.11985	5.48326	5.45755	5.78635
140606_at	0.0018	2.24e-05	-6.67722	3.05663	-1.83028	140606	selenoprotein M	SELENOM	3.44273	3.56265	3.00264	2.68641	3.52939	2.22987	5.72992	4.46014	5.11477	4.7955	4.94864	4.38638
2272_at	0.0018	2.25e-05	-6.67354	3.05139	-2.85777	2272	fragile histidine triad	FHIT	5.47947	4.72218	4.77831	3.96585	6.4813	3.87981	8.28189	7.11414	8.42334	8.03365	7.03343	7.56707
26156_at	0.0018	2.26e-05	-6.6719	3.04905	-1.17083	26156	ribosomal L1 domain containing 1	RSL1D1	5.75515	5.96645	5.70364	5.87607	5.11344	6.28412	7.10642	7.25936	7.00264	6.52613	6.89339	6.93591
3101_at	0.00181	2.27e-05	6.6666	3.04148	2.09032	3101	hexokinase 3 (white cell)	HK3	8.29296	9.83081	10.3156	9.56506	8.53474	9.72494	6.76082	7.27164	7.40255	7.40158	7.52	7.36559
64425_at	0.00181	2.3e-05	-6.66027	3.03245	-1.55519	64425	polymerase (RNA) I polypeptide E, 53kDa	POLR1E	3.23268	4.23931	3.81305	3.67648	3.88418	3.10008	6.01509	5.09394	5.24389	4.69124	5.28404	4.94872
84549_at	0.00185	2.39e-05	-6.632	2.99203	-1.03475	84549	MAK16 homolog (S. cerevisiae)	MAK16	5.15207	6.04162	5.66699	5.85892	5.73664	5.77868	6.89055	6.87189	6.92045	6.19693	6.77181	6.7918
55299_at	0.0019	2.53e-05	-6.59316	2.93629	-1.12462	55299	BRX1, biogenesis of ribosomes, homolog (S. cerevisiae)	BRIX1	5.34992	6.50365	5.85693	6.07223	5.78982	5.98628	7.20406	7.3191	7.25437	6.83095	6.76887	6.92922
7580_at	0.00195	2.65e-05	-6.56056	2.88934	-1.4634	7580	zinc finger protein 32	ZNF32	4.28883	5.57697	5.44024	4.87129	5.43425	4.7284	7.10463	6.30953	6.53536	6.44726	6.31004	6.41354
283927_at	0.00195	2.68e-05	-6.55363	2.87935	-1.08305	283927	nudix (nucleoside diphosphate linked moiety X)-type motif 7	NUDT7	3.18666	3.13842	3.01845	3.44831	2.90386	3.35644	4.46653	4.12514	4.886	4.00272	3.8095	4.26053
8522_at	0.00196	2.71e-05	6.54593	2.86822	1.28702	8522	growth arrest-specific 7	GAS7	5.73471	6.28001	6.58875	6.22443	5.85345	6.73589	4.40653	5.36312	4.82282	5.18496	5.07486	4.84284
64949_at	0.00196	2.78e-05	-6.52812	2.84247	-1.03353	64949	mitochondrial ribosomal protein S26	MRPS26	4.76856	5.43247	4.95807	5.19534	5.09186	4.83102	6.57713	6.11251	6.19694	5.5725	5.92634	6.09304
84418_at	0.00196	2.79e-05	6.52682	2.84058	1.81015	84418	cysteine-rich transmembrane module containing 1	CYSTM1	10.5723	11.9072	12.0503	11.6765	10.8793	10.9852	9.30121	9.27597	9.23022	10.2727	9.77965	9.3502
26520_at	0.00197	2.81e-05	-6.52164	2.83309	-1.12339	26520	translocase of inner mitochondrial membrane 9 homolog (yeast)	TIMM9	5.1434	6.06549	5.56418	5.95677	5.80661	6.09354	7.42642	6.87986	6.74637	6.77716	6.79553	6.745
83940_at	0.00202	2.95e-05	-6.48764	2.78376	-1.08815	83940	TatD DNase domain containing 1	TATDN1	2.83694	3.28205	2.69356	3.32504	2.87491	3.06662	4.43512	4.5007	4.28471	3.6415	3.7905	3.95548
5464_at	0.00203	2.99e-05	-6.47798	2.76971	-1.28495	5464	pyrophosphatase (inorganic) 1	PPA1	8.80767	9.66429	9.0546	8.96801	9.13843	8.46597	10.6782	10.5698	10.5302	9.93539	10.2042	9.89083
79168_at	0.00203	3.01e-05	6.47509	2.7655	2.18654	79168	leukocyte immunoglobulin-like receptor, subfamily A (with TM domain), member 6		7.70274	9.61853	9.87206	8.82907	8.71633	9.06957	6.07635	6.46865	7.26314	7.23107	6.61051	7.03934
973_at	0.00203	3.01e-05	-6.47417	2.76417	-1.50575	973	CD79a molecule, immunoglobulin-associated alpha	CD79A	2.38277	2.42911	2.49227	2.35959	2.61624	2.41268	4.64964	4.09204	4.24176	3.36337	3.06651	4.31386
10455_at	0.00203	3.02e-05	-6.47194	2.76092	-1.26265	10455	enoyl-CoA delta isomerase 2	ECI2	4.98298	6.17623	5.33521	5.30171	5.27355	5.05407	7.00275	6.57211	6.78545	6.15444	6.52368	6.66125
90075_at	0.00203	3.03e-05	-6.46947	2.75732	-1.00215	90075	zinc finger protein 30	ZNF30	2.5444	2.62151	2.4043	2.02271	2.39127	2.3061	3.42933	3.6032	3.60398	3.46214	2.69806	3.50648
7423_at	0.00203	3.04e-05	-6.46861	2.75606	-1.47917	7423	vascular endothelial growth factor B	VEGFB	5.24512	6.0204	5.57026	4.79888	5.57512	4.80525	7.10022	6.87675	7.23822	6.23719	6.88476	6.55291
57085_at	0.00203	3.05e-05	6.4661	2.75242	1.2954	57085	angiotensin II receptor-associated protein	AGTRAP	7.76971	8.14627	8.38724	8.93856	8.21184	8.92649	7.16404	6.94064	7.06346	7.45126	7.26881	6.71949
9241_at	0.00204	3.07e-05	-6.46193	2.74634	-1.23162	9241	noggin	NOG	2.5711	2.37636	2.83068	2.64234	2.82458	2.77577	4.69852	3.36577	4.02187	3.65558	4.04712	3.62167
92912_at	0.00204	3.08e-05	-6.45847	2.74129	-1.12966	92912	ubiquitin-conjugating enzyme E2Q family member 2	UBE2Q2	5.26344	6.10442	5.53488	5.50862	5.58113	4.96484	6.92113	6.84967	6.60824	6.217	6.46664	6.67259
84142_at	0.00208	3.2e-05	-6.433	2.70413	-1.35961	84142	family with sequence similarity 175, member A	ABRAXAS1	3.98873	3.88919	3.86159	4.4189	3.59439	3.9759	6.08699	5.52163	5.3956	4.9668	4.66284	5.25247
3384_at	0.00209	3.26e-05	-6.42036	2.68563	-1.08492	3384	intercellular adhesion molecule 2	ICAM2	7.15612	7.00949	6.62053	6.64836	6.84389	6.34071	8.49039	7.73456	7.90234	7.57336	7.6923	7.73564
23564_at	0.00211	3.32e-05	6.40719	2.66634	1.88754	23564	dimethylarginine dimethylaminohydrolase 2	DDAH2	6.44805	8.20446	8.79633	7.8344	7.84052	7.89577	5.97432	6.00247	6.03761	6.08963	5.86366	5.72658
7754_at	0.00216	3.45e-05	-6.38291	2.63072	-1.10395	7754	zinc finger protein 204, pseudogene		2.15704	2.91265	2.56151	1.97212	2.43168	2.10248	3.89084	3.52804	3.547	3.28591	3.02951	3.47988
112942_at	0.00218	3.5e-05	-6.37241	2.61529	-1.19763	112942	cilia and flagella associated protein 36	CFAP36	2.57442	3.25804	2.63141	2.6826	3.52186	2.52134	4.23494	4.45089	3.96619	3.6804	3.98571	4.05731
26119_at	0.00219	3.55e-05	-6.36308	2.60156	-1.9082	26119	low density lipoprotein receptor adaptor protein 1	LDLRAP1	6.76008	6.40829	6.16509	5.35129	6.97137	5.10695	8.43938	7.7141	8.26428	7.91071	7.92033	7.96344
5140_at	0.00222	3.63e-05	-6.34768	2.57888	-1.13006	5140	phosphodiesterase 3B, cGMP-inhibited	PDE3B	5.3166	5.39883	4.93182	4.57537	5.71967	4.8701	6.31561	6.35588	6.09217	6.52977	5.94878	6.35058
4673_at	0.00222	3.63e-05	-6.34757	2.57871	-1.0674	4673	nucleosome assembly protein 1-like 1	NAP1L1	5.85931	4.92904	4.92542	5.31604	4.95081	4.74266	6.27285	6.28268	6.18868	6.01842	5.97215	6.3929
10575_at	0.00227	3.77e-05	-6.32249	2.54169	-1.14276	10575	chaperonin containing TCP1, subunit 4 (delta)	CCT4	7.54948	8.45599	8.08942	8.33299	7.6275	7.98504	9.58188	9.31292	9.32002	8.7941	8.92955	8.95851
9531_at	0.00227	3.81e-05	-6.31553	2.5314	-1.12937	9531	BCL2-associated athanogene 3	BAG3	5.08935	4.8354	4.84018	5.10677	5.57654	5.50077	6.94043	6.24103	6.27529	6.26469	5.9981	6.00566
84513_at	0.00227	3.81e-05	-6.31493	2.53051	-1.14741	84513	phosphatidic acid phosphatase type 2 domain containing 1B	PLPP5	3.96868	3.74389	3.82176	4.06691	3.79666	3.28044	5.10445	5.03718	5.32704	4.55128	4.34085	5.20199
3732_at	0.00228	3.84e-05	6.31007	2.52332	1.17416	3732	CD82 molecule	CD82	8.5855	9.10049	9.35118	9.00978	9.41906	8.89913	7.5989	7.73229	7.75899	8.54378	8.13078	7.55541
147015_at	0.00233	3.97e-05	6.28791	2.49049	1.61284	147015	dehydrogenase/reductase (SDR family) member 13	DHRS13	6.64112	8.01583	7.85404	7.49263	8.25775	7.44952	6.09256	5.87209	6.00781	6.53419	5.39322	6.13402
51611_at	0.00234	4.01e-05	-6.28228	2.48214	-1.48565	51611	diphthamide biosynthesis 5	DPH5	3.8933	5.21645	4.75867	4.31562	4.56039	4.03277	6.6575	5.87726	5.92796	5.92087	5.44986	5.85768
84527_at	0.0025	4.35e-05	-6.22784	2.40113	-1.006	84527	zinc finger protein 559	ZNF559	5.01029	5.06032	5.12951	5.00321	5.91655	5.05184	6.49633	6.28679	6.26656	5.97089	5.89912	6.28805
116844_at	0.0025	4.41e-05	6.21815	2.38666	1.88811	116844	leucine-rich alpha-2-glycoprotein 1	LRG1	8.42451	9.96466	10.1133	9.62672	9.67669	9.19619	7.32177	7.34173	7.14657	8.61596	7.6435	7.6039
10226_at	0.0025	4.42e-05	6.21688	2.38475	1.06331	10226	perilipin 3	PLIN3	8.19293	8.8681	9.14195	9.18731	8.81315	9.09027	7.64941	7.67979	7.7514	8.24957	7.98625	7.59745
6036_at	0.00254	4.51e-05	6.20351	2.36477	2.20195	6036	ribonuclease, RNase A family, 2 (liver, eosinophil-derived neurotoxin)	RNASE2	8.57961	8.85396	9.63108	10.5306	8.63042	9.98597	7.50408	6.85198	7.36772	6.35631	7.75686	7.16306
4753_at	0.00256	4.61e-05	-6.18848	2.34226	-2.86416	4753	NEL-like 2 (chicken)	NELL2	4.98261	5.0113	4.16331	3.45226	6.26396	3.00601	7.62246	6.7533	7.1015	7.36473	7.61647	7.60597
23218_at	0.00256	4.65e-05	6.18333	2.33456	1.42954	23218	neurobeachin-like 2	NBEAL2	7.72638	8.04771	8.2153	7.89301	8.31475	8.3205	5.66479	6.70956	7.22103	7.10779	6.43304	6.80421
27075_at	0.00256	4.66e-05	-6.18199	2.33254	-2.93114	27075	tetraspanin 13	TSPAN13	4.46769	3.07258	3.52472	4.05929	1.50587	1.78779	6.69314	6.09447	5.72043	6.1743	5.68377	5.63868
56985_at	0.00257	4.69e-05	-6.1776	2.32596	-1.021	56985	ADP-ribose/CDP-alcohol diphosphatase, manganese-dependent	ADPRM	5.64472	5.58715	5.59412	5.45354	6.28208	5.49384	7.29183	6.50244	6.71466	6.56449	6.47299	6.63505
147923_at	0.00258	4.75e-05	-6.16879	2.31275	-1.09336	147923	zinc finger protein 420	ZNF420	2.64033	3.30812	2.93419	2.91723	3.06098	2.87682	4.2953	4.62102	4.17863	3.53035	3.64922	4.02331
2710_at	0.0026	4.84e-05	6.15661	2.29444	1.33752	2710	glycerol kinase	GK	7.64012	7.32621	7.37139	7.70275	8.16384	7.41006	5.7677	6.68527	6.1647	6.92326	5.73249	6.31583
9489_at	0.00265	5.04e-05	6.12937	2.25345	1.53119	9489	phosphatidylglycerophosphate synthase 1	PGS1	5.4237	6.79528	6.85097	6.79754	7.07047	6.47637	4.648	5.03341	4.96893	5.40855	4.81711	5.35119
129293_at	0.00265	5.06e-05	-6.12758	2.25076	-2.96495	129293	TraB domain containing 2A	TRABD2A	4.45276	4.41572	3.95108	3.11428	6.50742	3.00586	7.18398	7.168	7.4516	7.37153	6.75496	7.30673
51202_at	0.00266	5.17e-05	-6.11367	2.22977	-1.07296	51202	DEAD (Asp-Glu-Ala-Asp) box polypeptide 47	DDX47	6.19594	7.1058	6.6775	6.8815	6.33071	7.02343	7.95445	7.94286	7.99814	7.29298	7.64375	7.82047
79656_at	0.00266	5.17e-05	-6.11351	2.22954	-1.12126	79656	BEN domain containing 5	BEND5	2.12664	2.36329	2.29435	2.04214	1.70818	1.68547	3.20997	2.8639	3.53035	3.38493	2.5311	3.42734
4520_at	0.00266	5.19e-05	6.11115	2.22597	1.21559	4520	metal-regulatory transcription factor 1	MTF1	6.31552	7.20522	7.42265	7.0803	7.18947	7.49361	5.45754	5.86966	6.09846	6.33323	5.97716	5.67718
196883_at	0.00266	5.2e-05	6.10944	2.22338	1.31326	196883	adenylate cyclase 4	ADCY4	4.68633	4.86579	5.55597	4.75434	5.79626	5.08449	3.28072	3.84677	3.97213	3.98295	3.55484	4.22622
4869_at	0.00273	5.4e-05	-6.0841	2.18507	-1.41891	4869	nucleophosmin (nucleolar phosphoprotein B23, numatrin)	NPM1	5.85781	6.83786	6.13277	6.68034	5.88311	5.7122	8.3029	7.58582	7.6819	7.26503	7.15659	7.62529
5026_at	0.00275	5.49e-05	-6.07384	2.16954	-2.15561	5026	purinergic receptor P2X, ligand-gated ion channel, 5	P2RX5	3.29358	4.86211	4.35438	3.21606	3.9923	2.8237	5.6114	6.39141	6.56651	5.26908	5.43243	6.20498
28672_at	0.00278	5.56e-05	-6.06585	2.15741	-1.48035	28672	T cell receptor alpha variable 12-3		3.01162	3.07195	2.21691	2.07607	2.88011	2.03972	4.16391	4.01644	4.56102	3.28409	3.93202	4.22101
23223_at	0.00278	5.59e-05	6.06168	2.1511	1.18958	23223	ribosomal RNA processing 12 homolog (S. cerevisiae)	RRP12	7.02676	6.32045	6.90169	6.95515	6.97815	7.34299	5.14898	5.4708	5.5825	6.17179	6.04934	5.96431
6691_at	0.00282	5.71e-05	-6.04784	2.13008	-1.34009	6691	serine peptidase inhibitor, Kazal type 2 (acrosin-trypsin inhibitor)	SPINK2	2.66862	2.50742	2.35893	2.49536	2.42014	2.41811	4.68181	3.03125	4.24079	3.58206	3.79308	3.58011
8609_at	0.00283	5.77e-05	6.04137	2.12024	1.09341	8609	Kruppel-like factor 7 (ubiquitous)	KLF7	6.81938	7.19965	7.47817	6.90695	6.71722	6.86244	5.42639	5.953	5.77227	6.53989	5.69018	6.04164
3115_at	0.00283	5.81e-05	-6.0366	2.113	-1.50319	3115	major histocompatibility complex, class II, DP beta 1	HLA-DPB1	6.70248	7.06394	6.39051	7.98622	6.53985	6.90313	8.4924	8.74866	8.73937	7.87852	8.23091	8.5154
79694_at	0.00283	5.82e-05	-6.03592	2.11196	-1.08831	79694	mannosidase, endo-alpha	MANEA	3.47473	3.99466	3.40576	3.65312	3.13169	3.47249	4.79853	4.94171	4.91548	4.43413	3.95006	4.62239
83853_at	0.00288	5.97e-05	6.01912	2.08639	1.33769	83853	rhophilin associated tail protein 1-like	ROPN1L	7.54207	8.36934	8.20073	8.02073	8.31924	7.93572	6.29449	6.31826	6.64312	7.62461	6.95379	6.52743
132_at	0.00294	6.18e-05	-5.99696	2.05258	-1.07193	132	adenosine kinase	ADK	3.15287	2.3375	2.49519	3.0789	2.46282	2.75159	4.33124	3.57002	4.0064	3.67219	3.64797	3.48264
84628_at	0.00294	6.26e-05	5.98807	2.039	1.67069	84628	netrin G2	NTNG2	6.11584	6.76683	6.95409	6.60126	7.9248	6.93068	4.48656	5.14912	5.58499	5.75698	5.10222	5.18948
2887_at	0.00294	6.29e-05	5.98502	2.03434	2.51794	2887	growth factor receptor-bound protein 10	GRB10	4.5036	6.76186	7.14759	6.24985	5.45236	7.27291	3.33067	3.82587	3.63511	4.25651	3.78176	3.45061
90488_at	0.00294	6.3e-05	-5.98437	2.03334	-1.42913	90488	transmembrane protein 263	TMEM263	2.6863	3.29054	2.86117	2.4188	3.28308	2.10601	4.99612	3.98658	4.20244	3.75043	4.13671	4.14837
1602_at	0.00294	6.3e-05	5.98384	2.03253	2.08435	1602	dachshund family transcription factor 1	DACH1	5.24229	6.40025	7.28209	6.47701	5.51607	5.17783	4.03847	4.10912	3.19557	3.89439	4.40307	3.94879
57189_at	0.00297	6.44e-05	-5.96968	2.01087	-1.32728	57189	KIAA1147	DENND11	3.76063	4.39705	3.78856	3.10765	3.93493	3.32539	5.43599	5.24069	5.38005	4.56854	4.6534	4.99921
7923_at	0.00297	6.5e-05	-5.96366	2.00165	-1.71572	7923	hydroxysteroid (17-beta) dehydrogenase 8	HSD17B8	3.76666	4.85004	3.95101	3.93103	4.75387	2.88128	6.15539	5.66445	5.8229	5.38451	5.61344	5.78753
51599_at	0.00297	6.62e-05	-5.95205	1.98386	-1.32693	51599	lipolysis stimulated lipoprotein receptor	LSR	3.37216	3.26589	3.14517	2.75985	4.33564	3.00221	5.04953	4.6855	4.62258	4.47756	4.40058	4.60672
958_at	0.00297	6.66e-05	-5.9478	1.97733	-1.98848	958	CD40 molecule, TNF receptor superfamily member 5	CD40	3.39206	3.14175	3.25789	5.00435	2.87755	3.75209	6.19386	5.60171	5.97626	5.15676	4.97272	5.4553
9050_at	0.00304	6.93e-05	5.922	1.9377	1.19949	9050	proline-serine-threonine phosphatase interacting protein 2	PSTPIP2	8.07689	8.54687	8.96063	8.55169	7.5883	7.77652	6.97815	7.18832	7.12273	6.93186	6.99566	7.08723
79930_at	0.00304	6.94e-05	5.92118	1.93643	1.07959	79930	docking protein 3	DOK3	5.70358	6.19731	6.43342	6.12609	6.11314	6.4709	4.57605	4.97027	5.03951	5.72995	5.30836	4.94274
2788_at	0.00304	6.96e-05	-5.91999	1.93461	-1.46161	2788	guanine nucleotide binding protein (G protein), gamma 7	GNG7	3.63682	2.97004	2.97938	4.30473	3.64754	3.05551	5.1302	4.82562	5.5474	4.50241	4.67014	4.68788
64778_at	0.00304	7.04e-05	5.9123	1.92276	1.21534	64778	fibronectin type III domain containing 3B	FNDC3B	7.76084	7.91156	8.20815	7.66868	8.45406	7.51608	6.21271	6.94032	6.81595	7.31311	6.29854	6.64669
4863_at	0.00304	7.06e-05	-5.91019	1.91951	-1.05937	4863	nuclear protein, ataxia-telangiectasia locus	NPAT	6.15657	6.17858	5.97488	5.46348	6.10423	5.1327	6.76358	6.81766	7.04193	6.84404	6.72095	7.1785
2204_at	0.00304	7.11e-05	5.90585	1.91283	1.84545	2204	Fc fragment of IgA, receptor for	FCAR	4.60938	6.10703	6.6994	5.73181	5.15906	5.05354	3.38993	3.70094	3.78423	4.24183	3.36406	3.80656
6583_at	0.00304	7.11e-05	5.90552	1.91232	1.45563	6583	solute carrier family 22 (organic cation/zwitterion transporter), member 4	SLC22A4	8.32555	9.41798	9.48261	8.78017	8.82454	8.01299	7.03045	7.24632	7.11021	7.75747	7.6719	7.29374
60487_at	0.00304	7.14e-05	-5.90305	1.90851	-1.1131	60487	tRNA methyltransferase 11 homolog (S. cerevisiae)	TRMT11	3.81425	4.5523	4.13344	3.83809	4.34715	3.42531	5.36135	5.13793	5.00528	5.13243	4.67648	5.47566
1241_at	0.00304	7.15e-05	5.90233	1.9074	1.44937	1241	leukotriene B4 receptor	LTB4R	7.40849	8.41047	8.94067	8.129	8.3208	7.91151	6.4778	6.4274	6.78473	7.49033	6.48189	6.76254
10465_at	0.00304	7.16e-05	-5.90165	1.90637	-1.12729	10465	peptidylprolyl isomerase H (cyclophilin H)	PPIH	5.78138	6.83042	6.46953	6.62467	6.51133	6.33146	8.20167	7.47341	7.6465	7.17902	7.45363	7.35832
249_at	0.00306	7.23e-05	5.89467	1.89559	2.59969	249	alkaline phosphatase, liver/bone/kidney	ALPL	6.27443	8.62963	8.61302	8.27529	7.77281	8.7907	4.39373	5.84769	5.0544	6.47336	5.52339	5.46518
26354_at	0.00308	7.3e-05	-5.88839	1.88591	-1.04333	26354	guanine nucleotide binding protein-like 3 (nucleolar)	GNL3	4.73403	5.35129	4.77143	4.9688	4.42907	4.91997	6.17112	6.1018	6.20833	5.27732	5.78478	5.89119
51602_at	0.0031	7.4e-05	-5.88024	1.87333	-1.05746	51602	NOP58 ribonucleoprotein	NOP58	6.70433	7.86186	7.35998	7.26582	7.13003	7.22637	8.25877	8.54205	8.75407	7.97933	8.09418	8.26475
23095_at	0.00316	7.63e-05	5.86062	1.84299	1.38132	23095	kinesin family member 1B	KIF1B	5.08978	6.05914	6.15773	5.69989	5.15237	5.74158	3.86401	4.35852	4.37475	5.04666	4.00381	3.96481
3554_at	0.00319	7.75e-05	5.85016	1.8268	1.09711	3554	interleukin 1 receptor, type I	IL1R1	3.65411	4.10564	4.81291	4.01184	3.86724	4.64244	2.7053	3.20223	3.19229	3.065	3.22144	3.12524
120534_at	0.00319	7.77e-05	-5.84856	1.82431	-1.10308	120534	ADP-ribosylation factor-like 14 effector protein	ARL14EP	6.04087	7.2761	7.01143	6.49008	6.27564	6.47109	7.93648	7.65692	7.60031	7.53797	7.55399	7.89804
11112_at	0.00319	7.78e-05	-5.84771	1.823	-1.17589	11112	3-hydroxyisobutyrate dehydrogenase	HIBADH	4.46018	5.08102	4.40891	5.19936	4.26824	4.78745	6.49904	5.97276	5.97595	5.7499	5.6056	5.45727
100287896_at	0.0032	7.86e-05	-5.84168	1.81365	-1.04783	100287896	uncharacterized LOC100287896		2.40426	3.02056	2.26527	2.82332	2.51459	2.06392	3.572	3.67587	4.06415	3.58697	3.27501	3.20487
5287_at	0.0032	7.92e-05	-5.83683	1.80612	-1.44735	5287	phosphatidylinositol-4-phosphate 3-kinase, catalytic subunit type 2 beta	PIK3C2B	2.76682	3.74949	3.46479	2.91753	4.10262	2.49881	4.76253	4.62069	5.02736	4.82024	4.46535	4.488
708_at	0.00323	8.04e-05	-5.82656	1.79019	-1.15865	708	complement component 1, q subcomponent binding protein	C1QBP	7.28786	8.01127	7.89139	7.5071	6.87804	7.35838	9.20016	8.50674	8.70415	8.27567	8.47033	8.7289
1207_at	0.00329	8.25e-05	-5.80999	1.76445	-1.15062	1207	chloride channel, nucleotide-sensitive, 1A	CLNS1A	8.16011	8.75532	8.05627	8.67296	7.80513	8.65993	10.0547	9.55893	9.67266	9.10924	9.24447	9.37342
8778_at	0.00329	8.31e-05	5.80553	1.75752	1.76033	8778	sialic acid binding Ig-like lectin 5	SIGLEC5	9.34005	9.62598	9.98114	9.73121	9.72513	9.76375	7.38965	7.73972	8.64443	8.88814	6.8138	8.12955
115727_at	0.00329	8.33e-05	5.80395	1.75505	1.10071	115727	RAS guanyl releasing protein 4	RASGRP4	4.70014	4.61671	4.65466	4.8928	5.00435	5.13564	3.02216	3.87675	3.44104	4.34618	3.89379	3.82013
3142_at	0.00329	8.35e-05	5.80287	1.75336	1.29965	3142	H2.0-like homeobox	HLX	7.82757	7.33057	7.80782	7.76137	8.29345	7.28087	5.72313	6.21977	6.33111	7.11927	6.54196	6.56854
84293_at	0.0033	8.4e-05	-5.79879	1.74702	-1.439	84293	family with sequence similarity 213, member A	PRXL2A	3.74807	3.50294	2.9392	3.50693	3.80402	2.5908	4.98427	5.02866	5.48125	4.45878	4.40113	4.37187
306_at	0.0033	8.42e-05	5.79733	1.74475	2.57018	306	annexin A3	ANXA3	7.31111	9.48882	9.83495	9.70571	8.54846	8.87875	6.2213	6.41152	6.97822	7.41346	5.4925	5.82975
967_at	0.00333	8.51e-05	5.79055	1.73419	1.10815	967	CD63 molecule	CD63	9.94622	10.4447	10.7853	11.0741	10.1789	11.0309	9.68241	9.41071	9.25504	9.68528	9.53089	9.24696
222235_at	0.00341	8.78e-05	5.77073	1.70328	2.03987	222235	F-box and leucine-rich repeat protein 13	FBXL13	6.12607	5.21358	5.54327	4.66526	6.34992	5.40192	2.67391	4.13019	3.69906	4.4353	2.75679	3.36558
2091_at	0.00348	9.08e-05	-5.74896	1.66926	-1.43685	2091	fibrillarin	FBL	7.58552	8.95836	8.30217	8.15136	7.80928	8.29743	10.2052	9.88154	9.99509	9.28625	9.08072	9.27642
10750_at	0.00354	9.3e-05	-5.73428	1.64628	-1.2504	10750	GRB2-related adaptor protein	GRAP	2.61454	2.68252	2.5667	2.91795	3.35427	2.56388	4.6979	3.99973	4.53424	3.54855	3.86094	3.56088
59_at	0.00357	9.43e-05	5.72499	1.63171	1.60328	59	actin, alpha 2, smooth muscle, aorta	ACTA2	6.12653	6.78069	6.83018	6.09167	7.15378	6.38781	4.6007	5.64789	5.73411	4.48289	4.98363	4.3018
51070_at	0.00357	9.47e-05	-5.72269	1.62811	-1.36054	51070	nitric oxide synthase interacting protein	NOSIP	7.69477	8.13879	7.3558	7.47633	8.6489	7.29074	9.75184	9.09313	9.21718	9.04063	8.80411	8.86169
719_at	0.00357	9.5e-05	5.72052	1.6247	1.75017	719	complement component 3a receptor 1	C3AR1	8.88025	10.2746	10.7834	10.1917	9.89731	9.88128	8.33386	8.9844	8.0282	7.61611	7.82159	8.62341
9334_at	0.00357	9.53e-05	5.7186	1.62169	1.14147	9334	UDP-Gal:betaGlcNAc beta 1,4- galactosyltransferase, polypeptide 5	B4GALT5	4.20758	4.92747	5.22175	5.06812	4.7969	5.19731	3.4416	3.88776	3.51131	4.43422	3.72204	3.57339
26253_at	0.00364	9.77e-05	5.70247	1.59637	1.12414	26253	C-type lectin domain family 4, member E	CLEC4E	8.84944	9.35297	9.58612	9.21407	9.52624	8.74312	8.1337	7.91509	8.10488	8.80527	7.7365	7.8317
3113_at	0.00364	9.79e-05	-5.70167	1.59511	-1.62005	3113	major histocompatibility complex, class II, DP alpha 1	HLA-DPA1	9.91231	10.2037	9.61125	11.2949	9.23588	10.4576	11.9457	11.95	11.8831	11.3556	11.6203	11.6814
51227_at	0.00364	9.82e-05	-5.69965	1.59194	-1.23281	51227	phosphatidylinositol glycan anchor biosynthesis, class P	PIGP	5.46025	5.98472	5.41912	5.65192	5.0719	5.31785	7.50666	6.89012	6.89258	6.24729	6.48924	6.27671
114049_at	0.00364	9.9e-05	-5.69421	1.58339	-1.05777	114049	Williams Beuren syndrome chromosome region 22	BUD23	5.49766	6.51754	5.91918	6.26814	6.02873	5.90748	7.51959	7.29721	7.30483	6.63298	6.88795	6.84279
11275_at	0.00379	0.000105	5.65457	1.52093	1.42227	11275	kelch-like family member 2	KLHL2	6.3758	7.59502	7.64445	7.08341	6.76856	6.8613	5.23693	6.00642	5.46009	6.36091	5.42287	5.30772
330_at	0.00381	0.000107	-5.64754	1.50982	-1.44587	330	baculoviral IAP repeat containing 3	BIRC3	5.08464	5.72505	5.30075	4.71999	6.28475	4.59261	6.77484	6.97306	6.72146	6.45322	6.46644	6.99401
28662_at	0.00381	0.000107	-5.64751	1.50978	-1.09083	28662	T cell receptor alpha variable 21		2.09693	2.83844	2.48988	1.92625	2.71674	2.00559	3.67514	3.63074	3.36918	3.31009	2.87454	3.75911
51495_at	0.00384	0.000108	-5.6422	1.50139	-1.174	51495	protein tyrosine phosphatase-like A domain containing 1	HACD3	6.03702	7.22914	6.83441	6.18884	6.68509	6.01588	7.89394	7.61991	7.95741	7.35795	7.45945	7.74573
286006_at	0.0039	0.00011	5.62882	1.48022	1.40737	286006	leucine-rich single-pass membrane protein 1	LSMEM1	5.64913	5.22848	5.41711	4.95757	5.70541	5.9297	3.35831	4.71034	4.24907	3.80698	3.63755	4.68091
762_at	0.00392	0.000111	5.62323	1.47138	2.42688	762	carbonic anhydrase IV	CA4	6.32238	8.41079	9.02567	7.68811	6.60355	7.30609	5.22516	4.52252	4.71547	5.974	5.17263	5.18555
5209_at	0.00398	0.000113	5.6089	1.44868	1.23443	5209	6-phosphofructo-2-kinase/fructose-2,6-biphosphatase 3	PFKFB3	4.01219	5.24192	5.47612	4.73965	4.45209	4.92653	3.36195	3.53226	3.45842	4.03241	3.572	3.48488
4783_at	0.00401	0.000115	5.59978	1.43422	1.13743	4783	nuclear factor, interleukin 3 regulated	NFIL3	9.00898	9.543	9.35609	8.98859	9.55838	9.05963	7.53316	8.03897	7.97253	8.93937	7.97444	8.23161
163702_at	0.00401	0.000115	-5.59748	1.43057	-1.4189	163702	interferon, lambda receptor 1	IFNLR1	3.18913	4.57233	3.84337	3.06521	3.37006	3.21328	5.16299	5.43658	4.99213	4.39876	5.0022	4.77411
1509_at	0.00401	0.000116	5.5968	1.42949	1.35829	1509	cathepsin D	CTSD	6.37307	7.37077	8.15321	7.39478	6.77992	7.1838	6.00804	5.63288	5.6645	6.00531	6.1192	5.67585
3514_at	0.00403	0.000117	-5.58697	1.41387	-5.66162	3514	immunoglobulin kappa constant		9.03536	4.28966	3.67656	7.57739	2.43939	5.6021	10.9988	11.5044	12.8518	10.1488	9.74152	11.345
83463_at	0.00403	0.000118	5.58386	1.40894	1.12865	83463	MAX dimerization protein 3	MXD3	4.65561	4.96178	5.49	4.54525	5.6762	4.91074	3.35481	4.11012	4.02564	4.06288	3.90329	4.01097
55784_at	0.00403	0.000119	5.58096	1.40433	1.22614	55784	multiple C2 domains, transmembrane 2	MCTP2	4.11023	5.03023	5.32188	4.4824	4.71781	4.60215	2.80944	3.53186	3.55803	4.04391	3.41517	3.54944
128_at	0.00403	0.000119	-5.5802	1.40311	-1.03928	128	alcohol dehydrogenase 5 (class III), chi polypeptide	ADH5	5.30481	6.23405	5.70113	5.5543	5.46273	5.16209	7.13487	6.73291	6.63723	6.2411	6.37464	6.53403
29078_at	0.00404	0.000119	-5.57643	1.39712	-1.00133	29078	NADH dehydrogenase (ubiquinone) complex I, assembly factor 4	NDUFAF4	4.37954	5.07703	4.77997	4.24291	4.53772	4.47489	6.13026	5.70516	5.60801	5.0205	5.6001	5.43601
1964_at	0.00407	0.000121	-5.57026	1.38731	-1.68514	1964	eukaryotic translation initiation factor 1A, X-linked	EIF1AX	5.08683	5.29021	4.94866	5.22226	4.96184	4.3753	7.6575	7.07536	7.21022	5.98486	6.07774	5.99027
2882_at	0.00414	0.000124	-5.55374	1.36101	-1.87915	2882	glutathione peroxidase 7	GPX7	3.64301	4.62836	4.77134	3.56452	4.2046	2.66519	6.57114	5.68898	5.75587	5.32687	5.4398	5.96928
1019_at	0.00417	0.000125	-5.54813	1.35206	-1.09759	1019	cyclin-dependent kinase 4	CDK4	4.80131	5.88634	5.41566	5.66679	5.67208	5.49148	7.24555	6.57238	6.67762	6.20108	6.38193	6.44064
23421_at	0.00421	0.000127	-5.53623	1.33308	-1.27847	23421	integrin beta 3 binding protein (beta3-endonexin)	ITGB3BP	6.24289	5.40349	5.43652	5.45192	5.16674	4.93281	7.37902	6.62809	6.23881	6.52855	6.46955	7.06116
64780_at	0.00423	0.000129	5.52611	1.31691	1.21464	64780	microtubule associated monooxygenase, calponin and LIM domain containing 1	MICAL1	7.73721	8.04988	8.27042	8.17341	7.94165	8.3168	5.8346	7.3247	7.19225	7.08607	6.78478	6.97911
8807_at	0.00423	0.000131	5.52086	1.30852	1.50455	8807	interleukin 18 receptor accessory protein	IL18RAP	7.57549	8.58795	8.79385	7.94545	8.14682	7.72965	6.33396	6.88856	6.62718	7.41636	5.79626	6.6896
339318_at	0.00435	0.000136	-5.49534	1.26769	-1.06466	339318	zinc finger protein 181	ZNF181	4.15525	4.30699	3.93452	3.62294	4.27844	3.1802	5.00543	4.80734	5.03389	5.00291	4.6253	5.39142
59338_at	0.00437	0.000138	-5.48836	1.2565	-1.87353	59338	pleckstrin homology domain containing, family A (phosphoinositide binding specific) member 1	PLEKHA1	4.04254	5.71805	5.14009	3.82017	4.65466	3.40936	6.35974	6.43978	6.43358	6.22239	5.87293	6.69764
115286_at	0.00437	0.000138	-5.48716	1.25458	-1.16755	115286	solute carrier family 25 (S-adenosylmethionine carrier), member 26	SLC25A26	3.40428	4.66122	4.4888	4.11704	4.15207	3.89428	5.94498	5.17433	5.3109	4.9894	5.23187	5.07154
6137_at	0.00449	0.000144	-5.45896	1.2093	-1.26563	6137	ribosomal protein L13	RPL13	10.0668	11.0424	10.563	10.1419	10.4019	10.3165	12.1922	12.1424	12.0936	11.3343	11.1784	11.1855
23484_at	0.00455	0.000147	-5.44895	1.19321	-1.25337	23484	leptin receptor overlapping transcript-like 1	LEPROTL1	7.34282	7.46189	7.2179	7.14355	8.01272	6.54643	9.28112	8.43796	8.47383	8.37441	8.18642	8.49178
1378_at	0.00455	0.000147	5.44765	1.19111	1.38467	1378	complement component (3b/4b) receptor 1 (Knops blood group)	CR1	8.86015	10.0809	10.1174	9.49064	9.11634	9.60732	7.49784	8.19404	8.39185	8.83754	8.09274	7.95073
7077_at	0.00456	0.000147	5.44547	1.1876	1.03688	7077	TIMP metallopeptidase inhibitor 2	TIMP2	9.16116	9.09163	9.51128	9.58669	9.89295	9.99313	8.01922	8.45818	8.3851	9.04386	8.66989	8.4393
131118_at	0.00456	0.000148	-5.44387	1.18502	-1.08322	131118	DnaJ (Hsp40) homolog, subfamily C, member 19	DNAJC19	3.41686	4.37354	4.45966	4.30684	3.90849	3.95246	5.75793	5.27094	5.17534	4.80303	5.06566	4.84429
3820_at	0.00456	0.000148	-5.4424	1.18266	-3.11002	3820	killer cell lectin-like receptor subfamily B, member 1	KLRB1	7.04145	7.81613	6.93006	6.81884	7.71839	3.93938	10.7456	10.0197	9.7461	9.09067	9.3792	9.9431
54956_at	0.00458	0.00015	-5.43321	1.16785	-1.16885	54956	poly (ADP-ribose) polymerase family, member 16	PARP16	4.83394	4.60219	4.30199	4.31083	4.0371	3.47278	5.57938	4.9659	5.53095	5.88824	5.26052	5.34695
1974_at	0.00458	0.000151	-5.42948	1.16184	-1.13107	1974	eukaryotic translation initiation factor 4A2	EIF4A2	9.52765	10.0306	9.8814	9.20079	9.59164	8.75839	10.8167	10.832	10.8258	10.4788	10.0941	10.7295
134430_at	0.00461	0.000152	-5.42496	1.15456	-1.11002	134430	WD repeat domain 36	WDR36	4.55216	5.60604	5.04215	5.51761	4.69006	5.35864	6.73045	6.27029	6.26646	5.94871	5.85353	6.3573
604_at	0.00463	0.000154	5.41676	1.14132	1.48354	604	B-cell CLL/lymphoma 6	BCL6	8.42901	9.21439	9.31349	8.77688	9.08585	8.97993	6.58697	7.85109	7.79332	8.22439	6.76943	7.67309
55647_at	0.00469	0.000157	5.40613	1.12416	1.6169	55647	RAB20, member RAS oncogene family	RAB20	6.80456	7.69059	8.27015	7.98386	8.72263	8.1724	6.97632	6.53159	5.58254	6.34721	6.16867	6.33644
11222_at	0.00471	0.000158	-5.40145	1.1166	-1.08394	11222	mitochondrial ribosomal protein L3	MRPL3	6.81852	7.7787	7.11495	7.67881	6.94353	7.75955	8.88628	8.54321	8.46432	8.00037	8.26449	8.43901
9451_at	0.00473	0.000159	-5.39752	1.11024	-1.09379	9451	eukaryotic translation initiation factor 2-alpha kinase 3	EIF2AK3	3.72238	4.63665	3.92938	4.27689	4.17193	3.92272	5.29322	5.60262	5.68148	4.66983	4.73799	5.23758
51317_at	0.00484	0.000164	5.38005	1.08198	1.20555	51317	PHD finger protein 21A	PHF21A	5.91246	6.36992	6.1763	6.22765	6.14047	6.60018	3.96413	5.25948	5.13642	5.5358	5.19037	5.10746
8883_at	0.00489	0.000167	-5.36764	1.06187	-1.18804	8883	NEDD8 activating enzyme E1 subunit 1	NAE1	7.11874	8.0905	7.83038	7.27154	7.55708	6.54704	8.86125	8.72238	8.52562	8.32922	8.41912	8.68592
1880_at	0.00501	0.000173	-5.34521	1.02548	-2.86863	1880	G protein-coupled receptor 183	GPR183	5.85815	4.5952	4.26107	3.18743	6.7049	3.3546	8.03602	7.89154	7.21128	7.09409	7.49218	7.44804
64386_at	0.00511	0.000179	5.32694	0.995769	1.25356	64386	matrix metallopeptidase 25	MMP25	7.82596	8.11286	8.31596	7.82266	8.38186	8.36317	5.95465	7.14158	6.81491	7.69237	6.92642	6.77121
113791_at	0.00511	0.000179	-5.32692	0.995743	-1.66836	113791	phosphoinositide-3-kinase interacting protein 1	PIK3IP1	5.27734	5.86857	5.63957	4.39241	5.98956	4.18042	7.23831	6.69271	7.09647	6.89051	6.35563	7.08441
8725_at	0.00513	0.00018	-5.32388	0.990794	-1.10618	8725	URI1, prefoldin-like chaperone	URI1	5.28584	6.54263	6.12103	5.87694	5.76649	5.29937	7.17674	7.09087	7.05732	6.53697	6.67447	6.99301
9586_at	0.00513	0.00018	5.32119	0.98641	1.55436	9586	cAMP responsive element binding protein 5	CREB5	7.70672	7.729	7.89414	7.81923	8.70842	8.14259	5.42169	6.51945	6.67662	7.47116	6.07833	6.5067
51601_at	0.00514	0.000181	-5.31833	0.981754	-1.12993	51601	lipoyltransferase 1	LIPT1	4.8216	5.92889	5.55271	5.33028	4.95789	4.46412	6.59158	6.30759	6.15318	6.23267	6.12044	6.42961
92106_at	0.00519	0.000184	-5.30919	0.966867	-1.83361	92106	oxidoreductase NAD-binding domain containing 1	OXNAD1	4.97335	5.92495	5.49457	4.30142	6.12289	3.99208	7.47946	6.60993	7.05045	6.72676	6.83562	7.10871
222487_at	0.00519	0.000184	5.30773	0.964492	1.52027	222487	G protein-coupled receptor 97	ADGRG3	5.66306	6.4428	6.69896	6.22302	6.99094	6.44514	4.10665	4.79503	5.01948	5.8664	4.40986	5.14488
79730_at	0.00524	0.000187	5.29879	0.949911	2.16233	79730	NOP2/Sun domain family, member 7	NSUN7	3.71736	6.2632	5.6101	5.91372	4.57935	6.15908	2.51396	3.71908	3.33622	3.3706	3.03262	3.29637
340542_at	0.00528	0.000189	-5.29077	0.93683	-1.40356	340542	brain expressed, X-linked 5	BEX5	2.55218	2.34693	2.52224	2.46985	3.36915	2.16022	4.94017	4.24618	4.06025	3.54502	3.4458	3.60455
56271_at	0.00534	0.000193	-5.2784	0.916618	-1.60478	56271	brain expressed, X-linked 4	BEX4	6.4879	6.01305	5.21546	6.92276	6.96273	5.28443	8.18997	7.50182	7.73854	7.71853	7.70822	7.65794
5359_at	0.00546	0.000201	5.2556	0.879317	1.41875	5359	phospholipid scramblase 1	PLSCR1	8.08537	9.27835	9.61942	9.22354	9.64762	9.17821	8.09655	7.83185	7.74997	8.29549	7.46447	7.08171
64776_at	0.00546	0.000201	-5.25488	0.878148	-1.57069	64776	chromosome 11 open reading frame 1	C11orf1	3.82499	5.29263	4.8109	4.47476	5.21105	4.16964	7.19222	5.92845	6.32438	5.59979	6.00226	6.161
29107_at	0.00548	0.000202	-5.25057	0.871086	-1.06862	29107	nuclear transport factor 2-like export factor 1	NXT1	6.16529	7.4455	6.99833	6.80378	7.15757	6.74021	8.5375	7.80192	7.94268	7.60493	7.95821	7.8772
79673_at	0.00549	0.000203	-5.2486	0.867856	-1.07638	79673	zinc finger protein 329	ZNF329	2.86278	3.42575	2.95329	2.47744	3.14353	2.49341	4.55622	3.78848	4.08374	4.11057	3.366	3.9095
30812_at	0.00554	0.000209	-5.23206	0.840734	-1.05676	30812	SRY (sex determining region Y)-box 8	SOX8	2.02422	2.48449	2.4793	1.8735	2.356	1.93304	3.39007	3.36021	3.92914	3.0385	2.55327	3.2199
100093630_at	0.00556	0.00021	-5.22811	0.834262	-1.15268	100093630	small nucleolar RNA host gene 8 (non-protein coding)		7.66216	7.66364	7.40978	7.46301	7.52517	7.33604	9.61314	8.87146	8.43723	8.21031	8.04117	8.8026
152137_at	0.00576	0.00022	-5.19994	0.787965	-1.07768	152137	coiled-coil domain containing 50	CCDC50	2.58121	3.17362	2.98171	3.41999	2.68036	3.44871	4.37239	4.60869	4.38574	3.55845	3.75903	4.06738
11142_at	0.00584	0.000224	-5.18885	0.769707	-1.0844	11142	protein kinase (cAMP-dependent, catalytic) inhibitor gamma	PKIG	4.15295	2.96428	3.21922	3.04258	2.71391	2.97357	4.50069	4.30755	3.89235	4.14968	4.45675	4.2659
5631_at	0.00589	0.000227	-5.18154	0.757657	-1.12572	5631	phosphoribosyl pyrophosphate synthetase 1	PRPS1	5.90523	6.87054	6.18161	6.00137	6.40916	5.36593	7.74649	7.218	7.32373	7.08439	6.97669	7.13888
51279_at	0.00592	0.000229	5.17652	0.749374	1.17853	51279	complement component 1, r subcomponent-like	C1RL	7.41328	7.27308	7.6186	7.78884	8.17251	7.05949	5.81652	6.67696	6.02078	7.07945	6.34115	6.31975
9397_at	0.00594	0.00023	-5.17278	0.743214	-1.44114	9397	N-myristoyltransferase 2	NMT2	3.14939	4.00239	3.20682	2.70066	3.9596	2.46245	4.84936	4.93615	5.10263	4.35659	4.08771	4.7957
54536_at	0.00599	0.000233	5.16553	0.731253	1.01011	54536	exocyst complex component 6	EXOC6	6.56281	7.48702	7.83964	7.18722	7.24001	6.93998	5.93813	6.03583	6.07876	6.67923	6.31899	6.1451
6272_at	0.006	0.000234	5.16214	0.725664	1.5149	6272	sortilin 1	SORT1	5.59612	6.56905	7.40385	6.93838	5.53488	6.70012	4.94503	4.87138	4.84308	5.04517	5.31545	4.63292
7706_at	0.00619	0.000245	5.13528	0.681268	1.11736	7706	tripartite motif containing 25	TRIM25	5.41699	5.79099	5.77556	5.43182	6.45259	6.13862	4.00869	4.91472	5.03226	5.02847	4.44487	4.87339
11168_at	0.00619	0.000246	-5.13316	0.677752	-1.10138	11168	PC4 and SFRS1 interacting protein 1	PSIP1	6.83363	6.78174	6.49339	6.41525	7.31596	5.98244	7.63866	8.25822	7.98837	7.62652	7.26545	7.65348
91574_at	0.00622	0.000248	-5.12757	0.6685	-1.24164	91574	chromosome 12 open reading frame 65	MTRFR	4.23031	5.36208	4.68106	4.46843	4.95602	3.61765	5.81032	5.86984	6.16148	5.54412	5.77621	5.60346
8445_at	0.00629	0.000251	-5.11916	0.654568	-1.57111	8445	dual-specificity tyrosine-(Y)-phosphorylation regulated kinase 2	DYRK2	5.49513	6.17445	5.53869	4.5062	5.67721	4.07947	6.9835	6.90713	7.05706	6.5548	6.54166	6.8537
9249_at	0.00631	0.000253	-5.11613	0.649548	-1.57239	9249	dehydrogenase/reductase (SDR family) member 3	DHRS3	3.87842	3.19144	2.99283	2.71339	3.73148	2.32786	5.32137	4.72309	4.14804	4.81147	3.96963	5.29615
51386_at	0.00644	0.000259	-5.10217	0.626388	-1.03453	51386	eukaryotic translation initiation factor 3, subunit L	EIF3L	9.93186	10.2547	9.8981	10.5256	9.43975	10.7307	11.3394	11.4706	11.2433	10.7558	11.0002	11.1786
64219_at	0.00646	0.00026	-5.09912	0.621324	-1.21326	64219	praja ring finger 1, E3 ubiquitin protein ligase	PJA1	4.19558	5.39281	4.75806	4.01924	4.36893	3.70283	5.79241	5.75565	5.81424	5.33809	5.44127	5.57535
55711_at	0.00649	0.000262	5.09545	0.615237	1.7149	55711	fatty acyl CoA reductase 2	FAR2	7.6039	7.26814	8.43606	8.90014	7.59435	7.49415	5.53706	6.47973	5.53129	7.06183	5.81185	6.5856
1824_at	0.00651	0.000264	5.09059	0.607165	1.51348	1824	desmocollin 2	DSC2	5.58013	4.33336	4.0979	5.84621	4.92276	5.08768	2.85378	3.65493	3.13099	3.481	3.7344	3.93209
9540_at	0.00663	0.000271	5.07493	0.581128	2.07253	9540	tumor protein p53 inducible protein 3	TP53I3	5.40576	6.02926	7.28044	6.87948	4.33436	6.33407	3.91284	3.76876	4.316	3.6373	4.18509	4.00822
91662_at	0.00664	0.000271	5.0738	0.579252	1.01476	91662	NLR family, pyrin domain containing 12	NLRP12	9.78124	9.63333	9.89689	9.46664	9.76596	9.75281	7.82783	8.78679	8.91265	9.37739	8.64102	8.6626
3985_at	0.00664	0.000272	5.07289	0.577733	1.39685	3985	LIM domain kinase 2	LIMK2	6.19112	6.82909	6.62714	6.25437	7.45881	6.30225	4.54645	5.34695	5.13084	6.17959	4.8797	5.19818
201161_at	0.00671	0.000277	-5.06174	0.559178	-1.27155	201161	centromere protein V	CENPV	4.07468	4.55651	4.37958	3.17922	4.49977	3.38417	5.71016	5.20163	5.57788	4.92257	5.05575	5.23524
4306_at	0.00677	0.000281	-5.05348	0.545416	-1.13691	4306	nuclear receptor subfamily 3, group C, member 2	NR3C2	2.41791	2.34559	2.30176	2.1986	3.05427	2.19465	4.285	3.75495	3.80772	3.40484	2.86683	3.21493
683_at	0.00693	0.000292	5.02988	0.50605	1.17885	683	bone marrow stromal cell antigen 1	BST1	7.98158	8.85944	9.31182	9.31111	8.5211	8.68254	7.39135	7.29795	7.52713	8.19552	7.86128	7.32129
55622_at	0.00695	0.000294	-5.02555	0.498829	-1.27892	55622	tetratricopeptide repeat domain 27	TTC27	3.7201	5.39072	5.02858	4.89684	4.34973	5.07416	6.32012	6.18178	6.17856	5.60524	5.68568	6.16224
28586_at	0.00704	0.0003	-5.01291	0.477696	-2.25307	28586	T cell receptor beta variable 9		4.78165	5.06329	4.23142	3.68595	6.8411	4.70873	8.0477	7.00022	6.731	6.82245	6.6919	7.53732
9214_at	0.00704	0.0003	-5.01283	0.477574	-2.41394	9214	Fas apoptotic inhibitory molecule 3	FCMR	4.88453	6.09079	5.48249	3.69927	5.71272	2.87305	7.5139	7.24098	7.32669	6.84922	6.85401	7.44171
91056_at	0.00712	0.000306	5.00063	0.45716	1.08918	91056	adaptor-related protein complex 5, beta 1 subunit	AP5B1	6.47838	6.33484	6.76473	6.49125	7.32218	6.45918	5.44344	5.437	5.61019	6.3947	5.08277	5.34738
8351_at	0.00719	0.000312	4.98984	0.439099	1.44191	8351	histone cluster 1, H3d		7.75588	7.19374	7.25623	6.72417	8.2252	6.77163	5.40407	6.15934	5.54066	6.60444	5.39036	6.17654
240_at	0.00719	0.000314	4.98565	0.432066	1.34981	240	arachidonate 5-lipoxygenase	ALOX5	8.69472	9.01255	9.32757	9.06491	8.45597	9.24037	6.40746	7.62735	7.62875	8.27884	7.89194	7.86288
84928_at	0.00723	0.000316	-4.98182	0.425645	-1.23124	84928	transmembrane protein 209	TMEM209	3.76244	4.62238	3.78632	4.51418	3.33851	3.35136	5.55129	5.39627	5.15377	4.92712	4.57332	5.16089
911_at	0.00723	0.000318	-4.97856	0.420189	-1.21961	911	CD1c molecule	CD1C	2.89327	2.40817	2.70802	3.00815	3.10525	3.51907	4.85624	4.38554	4.43085	3.3423	3.80623	4.13844
874_at	0.00726	0.000322	-4.97142	0.408201	-1.4078	874	carbonyl reductase 3	CBR3	2.4942	3.11276	3.32269	2.85126	4.29655	2.86491	5.14918	4.76913	4.2787	4.85748	4.05566	4.27902
84649_at	0.00736	0.000329	4.95855	0.386598	1.25322	84649	diacylglycerol O-acyltransferase 2	DGAT2	8.29673	8.80266	8.48331	8.20575	9.44332	8.488	6.88571	7.17234	7.0393	8.28576	7.43035	7.387
284021_at	0.00736	0.00033	4.95694	0.383899	1.47715	284021	mast cell immunoglobulin-like receptor 1	MILR1	3.84232	3.58891	4.75429	5.40973	5.33458	4.31415	3.09929	3.02455	3.46926	2.99132	3.04887	2.74782
8825_at	0.00752	0.000341	4.93732	0.350908	1.56841	8825	lin-7 homolog A (C. elegans)	LIN7A	6.1886	6.7989	6.82459	7.02202	7.07774	7.093	4.09283	5.4927	5.03612	6.44419	5.52626	5.00226
6920_at	0.00755	0.000345	-4.93077	0.339886	-1.74314	6920	transcription elongation factor A (SII), 3	TCEA3	4.04362	3.50906	3.08227	3.023	5.12673	2.9798	5.95711	5.26701	5.70799	5.4863	4.81	4.99492
51523_at	0.00763	0.00035	-4.92103	0.323479	-1.4591	51523	CXXC finger protein 5	CXXC5	5.74318	6.4134	6.07452	6.46	4.7928	6.69453	8.06427	7.59526	7.62513	6.97153	7.1737	7.50318
80216_at	0.00772	0.000356	4.91117	0.306876	1.35158	80216	alpha-kinase 1	ALPK1	4.85928	4.6761	4.83622	4.85157	5.79924	4.67948	2.63363	4.08663	3.72726	4.25261	3.20469	3.68761
10745_at	0.00772	0.000358	4.90896	0.303146	1.19442	10745	putative homeodomain transcription factor 1	PHTF1	4.5031	5.80253	5.96913	4.85349	5.04077	4.82286	3.85638	4.41663	3.92213	4.11983	3.63274	3.87764
53831_at	0.00779	0.000364	4.89864	0.285727	4.12997	53831	G protein-coupled receptor 84	GPR84	4.59397	9.28959	10.0638	7.87761	4.89304	6.63647	3.08129	3.11914	3.21453	3.25231	3.13596	2.77145
51237_at	0.00779	0.000365	-4.89741	0.283647	-2.61545	51237	marginal zone B and B1 cell-specific protein	MZB1	3.05269	3.05908	2.96114	2.9134	2.90489	3.13517	5.23525	5.72731	8.33732	4.48686	4.45955	5.4728
101928615_at	0.00785	0.00037	4.88944	0.270197	1.26246	101928615	uncharacterized LOC101928615		5.55935	5.80568	6.14281	6.64455	6.56139	6.65682	4.77469	5.50056	5.02754	5.58888	4.50701	4.39718
64218_at	0.00785	0.00037	4.88907	0.269574	1.24007	64218	sema domain, immunoglobulin domain (Ig), transmembrane domain (TM) and short cytoplasmic domain, (semaphorin) 4A	SEMA4A	6.99142	7.47128	7.67392	7.73792	8.42479	7.90716	5.74718	6.36558	6.68515	7.11689	6.6893	6.16197
2180_at	0.00785	0.000371	4.88781	0.267445	1.20675	2180	acyl-CoA synthetase long-chain family member 1	ACSL1	10.0135	10.802	10.8284	10.3307	10.7034	10.3833	8.59677	9.58099	9.45654	10.1273	8.71641	9.34288
113246_at	0.00796	0.000381	-4.87137	0.239657	-1.98484	113246	chromosome 12 open reading frame 57	C12orf57	7.83991	9.22158	8.59678	6.88154	8.53943	6.75082	10.834	9.85266	9.81949	9.853	9.61363	9.76626
140885_at	0.00802	0.000386	4.8643	0.22769	1.07484	140885	signal-regulatory protein alpha	SIRPA	8.77451	8.56067	8.73476	9.11126	9.38561	9.30744	7.08696	7.95445	7.76391	8.51361	8.18071	7.92558
7100_at	0.00805	0.000389	4.85911	0.218911	2.29457	7100	toll-like receptor 5	TLR5	5.79629	8.93684	8.68173	8.58599	8.36901	8.89407	5.17662	6.0542	6.0354	6.35982	5.89568	5.97481
79895_at	0.00841	0.000413	4.82431	0.159901	2.02298	79895	ATPase, class I, type 8B, member 4	ATP8B4	5.93733	6.47602	7.71711	8.19561	5.49862	6.96165	4.90039	5.27114	4.6496	4.01865	5.06159	4.74711
27180_at	0.00843	0.000415	4.82137	0.154915	1.26424	27180	sialic acid binding Ig-like lectin 9	SIGLEC9	5.763	6.43489	6.90012	6.75953	5.155	6.5658	4.75969	5.15092	4.99738	5.27421	4.90946	4.90127
81618_at	0.00846	0.000418	-4.81679	0.147124	-1.54297	81618	integral membrane protein 2C	ITM2C	4.46487	3.63397	3.63352	3.98465	4.49923	3.47845	5.6204	5.70092	6.69332	4.49024	5.27893	5.1687
55893_at	0.00846	0.000419	-4.81514	0.144326	-1.09494	55893	zinc finger protein 395	ZNF395	5.57801	5.0013	4.54769	5.78154	6.19809	5.71797	6.58866	6.71977	6.57056	6.49223	6.55272	6.4703
51727_at	0.00852	0.000423	-4.81069	0.136772	-1.04083	51727	cytidine monophosphate (UMP-CMP) kinase 1, cytosolic	CMPK1	8.30398	8.43196	8.11041	7.75584	7.35539	7.3301	9.48843	8.99127	8.97927	8.63122	8.6571	8.78538
6124_at	0.00852	0.000424	-4.80934	0.134474	-1.0756	6124	ribosomal protein L4	RPL4	10.556	10.9577	10.6206	10.8128	9.4997	10.9577	11.8555	11.8401	11.8285	11.4295	11.4075	11.497
1823_at	0.00852	0.000424	-4.8093	0.134404	-1.82454	1823	desmocollin 1	DSC1	2.82259	2.35605	2.23354	2.25264	2.51107	2.22106	4.98671	2.84831	3.97584	5.50925	3.47049	4.5536
7850_at	0.00853	0.000425	4.80764	0.131577	2.47918	7850	interleukin 1 receptor, type II	IL1R2	9.01087	11.5966	11.9508	9.65103	9.28241	10.9334	7.45677	7.529	7.71952	9.01172	8.1187	7.71431
168537_at	0.00853	0.000425	-4.80691	0.130336	-1.1186	168537	GTPase, IMAP family member 7	GIMAP7	8.76185	10.3118	9.71551	9.33083	9.66526	10.1653	10.8576	11.0645	11.029	10.5473	10.4873	10.6765
6480_at	0.0086	0.00043	-4.80095	0.120197	-1.14523	6480	ST6 beta-galactosamide alpha-2,6-sialyltranferase 1	ST6GAL1	6.91224	7.67271	7.27344	6.90686	7.02373	5.90328	8.38222	8.23412	8.22952	7.83444	7.81714	8.06621
7076_at	0.0086	0.000431	4.79839	0.115848	1.06319	7076	TIMP metallopeptidase inhibitor 1	TIMP1	8.39448	8.8103	8.97468	8.98951	7.87418	9.50489	7.86773	7.54888	7.49653	7.89013	7.76002	7.6056
54463_at	0.0086	0.000432	-4.79779	0.11482	-2.13322	54463	family with sequence similarity 134, member B	RETREG1	4.17932	4.65873	4.61493	3.10925	5.56763	3.49011	6.6874	6.24022	7.84274	5.90335	5.58187	6.16369
11025_at	0.0086	0.000433	4.79615	0.112041	1.31988	11025	leukocyte immunoglobulin-like receptor, subfamily B (with TM and ITIM domains), member 3		9.12503	9.72784	9.97427	9.41917	9.95029	9.93495	7.3102	8.56927	8.41308	9.26556	8.09918	8.55496
6604_at	0.0086	0.000433	4.79587	0.111561	1.57333	6604	SWI/SNF related, matrix associated, actin dependent regulator of chromatin, subfamily d, member 3	SMARCD3	6.82184	7.24891	7.16178	8.17124	7.17794	9.06398	6.11132	6.00631	5.82777	6.35543	6.16911	5.73574
91298_at	0.00864	0.000436	-4.79227	0.105428	-1.2494	91298	chromosome 12 open reading frame 29	C12orf29	5.10403	5.94303	5.6001	5.5466	4.84716	4.272	6.99232	6.18149	6.45487	6.06971	6.41322	6.69773
142891_at	0.00869	0.000441	4.78571	0.094267	1.10327	142891	sterile alpha motif domain containing 8	SAMD8	4.4144	5.24625	5.64191	4.92621	5.34632	4.69322	4.12916	3.97755	3.48305	4.61583	3.57968	3.86341
10576_at	0.0087	0.000442	-4.78397	0.091304	-1.1021	10576	chaperonin containing TCP1, subunit 2 (beta)	CCT2	6.61971	7.93025	7.47159	7.4635	6.97187	6.99806	8.96229	8.36926	8.52002	7.8054	8.10236	8.30825
58477_at	0.0088	0.00045	-4.77434	0.074896	-1.04911	58477	signal recognition particle receptor, B subunit	SRPRB	4.12014	5.4816	4.98497	5.24924	4.93225	4.88891	6.42831	6.12518	6.32178	5.54393	5.78583	5.74673
9447_at	0.00894	0.000461	4.75924	0.049148	1.62388	9447	absent in melanoma 2	AIM2	6.75659	8.64959	8.75694	8.71405	8.59589	8.3291	6.40503	6.75034	7.26706	6.96717	5.87288	6.79641
91351_at	0.00894	0.000461	4.75912	0.048939	1.06486	91351	DEAD (Asp-Glu-Ala-Asp) box polypeptide 60-like	DDX60L	8.86227	9.12959	8.97672	8.72475	10.1284	9.49486	7.96219	7.99164	7.83819	8.60137	8.36786	8.16622
353514_at	0.00895	0.000463	4.75689	0.045128	1.51711	353514	leukocyte immunoglobulin-like receptor, subfamily A (with TM domain), member 5	LILRA5	7.58189	9.513	9.80162	9.40198	8.65742	8.82463	7.57842	7.72547	7.64791	7.51094	7.22276	6.9924
51176_at	0.00913	0.000476	-4.74047	0.017092	-2.70714	51176	lymphoid enhancer-binding factor 1	LEF1	4.8294	5.43712	4.76583	2.72085	6.19265	2.47982	7.5736	7.01569	7.38459	6.88626	6.61525	7.1931
3655_at	0.00927	0.000489	-4.72525	-0.008929	-1.68108	3655	integrin, alpha 6	ITGA6	4.94237	4.9577	4.40273	3.96733	5.30476	2.74804	6.2914	6.23616	6.16772	5.93725	5.84868	5.92822
634_at	0.0093	0.000492	4.7219	-0.014665	2.53502	634	carcinoembryonic antigen-related cell adhesion molecule 1 (biliary glycoprotein)	CEACAM1	5.41454	7.29438	8.34153	7.38915	5.75763	4.81036	3.25768	3.71601	4.16589	4.42541	3.90464	4.32784
121551_at	0.0093	0.000493	-4.72091	-0.016368	-1.44555	121551	BTB (POZ) domain containing 11	BTBD11	5.46774	3.88527	3.59979	3.27661	4.08736	3.63626	5.5435	5.6107	5.00476	5.74427	5.39987	5.32325
608_at	0.00931	0.000496	-4.71677	-0.023455	-3.22382	608	tumor necrosis factor receptor superfamily, member 17	TNFRSF17	3.1845	2.14408	1.94052	2.13219	1.73511	1.92912	6.00091	5.3319	8.25415	4.21956	3.04525	5.55667
471_at	0.0094	0.000503	-4.7084	-0.037793	-1.14826	471	5-aminoimidazole-4-carboxamide ribonucleotide formyltransferase/IMP cyclohydrolase	ATIC	4.73026	6.36667	5.76991	5.92381	5.81746	6.01821	7.35067	7.05804	7.0589	6.56513	6.46593	7.01719
6286_at	0.00944	0.000509	4.70206	-0.048655	1.4402	6286	S100 calcium binding protein P	S100P	11.9778	12.0176	12.2048	11.9698	12.3405	11.8037	11.2753	11.036	10.6735	9.05042	10.8115	10.8262
3162_at	0.00945	0.000513	4.69679	-0.057688	1.62428	3162	heme oxygenase (decycling) 1	HMOX1	5.60351	6.57297	7.85809	6.24803	6.37299	7.74754	4.96102	5.41299	4.8012	5.20436	5.33764	4.94027
27284_at	0.00956	0.000525	4.68401	-0.079605	1.67532	27284	sulfotransferase family, cytosolic, 1B, member 1	SULT1B1	5.57496	7.71017	7.83457	7.11825	7.20405	7.48257	5.02261	5.27007	5.43573	6.4253	5.41111	5.30783
55775_at	0.00958	0.000529	-4.67992	-0.086632	-1.13565	55775	tyrosyl-DNA phosphodiesterase 1	TDP1	4.41566	5.48744	5.11887	5.27005	5.04223	3.9301	6.19155	6.10077	6.32916	5.62627	5.77718	6.05332
5567_at	0.00963	0.000534	-4.67439	-0.09613	-1.30124	5567	protein kinase, cAMP-dependent, catalytic, beta	PRKACB	4.20174	5.19253	4.6177	3.84985	4.30974	3.26532	6.14728	5.57636	5.46909	5.25049	5.19556	5.60556
199675_at	0.00963	0.000534	4.67357	-0.097523	2.71633	199675	mast cell-expressed membrane protein 1	MCEMP1	7.10852	10.9635	11.0566	9.87645	8.39765	9.5058	6.49718	6.93308	7.02911	7.16074	6.6078	6.38263
1647_at	0.00982	0.00055	4.65727	-0.125548	1.82931	1647	growth arrest and DNA-damage-inducible, alpha	GADD45A	8.49824	9.62276	10.0068	8.46495	8.05029	7.46773	6.96438	6.4931	6.27553	6.79531	7.43265	7.17393
5836_at	0.00996	0.000561	4.64512	-0.146441	1.30512	5836	phosphorylase, glycogen, liver	PYGL	9.92547	10.7406	10.8659	11.0369	10.2917	10.9254	8.30543	9.39166	9.29984	10.2266	9.35532	9.37638
54682_at	0.0102	0.00058	4.62594	-0.17948	1.08863	54682	MANSC domain containing 1	MANSC1	6.38053	6.89637	6.96117	6.64958	7.06674	6.39664	5.09361	5.59178	5.24586	6.66481	5.61905	5.60412
10970_at	0.0102	0.000581	4.62513	-0.180874	1.37866	10970	cytoskeleton-associated protein 4	CKAP4	9.60208	10.5346	11.013	10.0498	9.33562	9.81824	8.42004	8.78504	8.90096	9.22878	8.92429	7.8222
5557_at	0.0103	0.000593	-4.61333	-0.20123	-1.1771	5557	primase, DNA, polypeptide 1 (49kDa)	PRIM1	4.21129	5.03445	4.9343	4.66707	4.89473	3.61269	6.4127	5.71274	5.96647	5.40446	5.53763	5.38311
64859_at	0.0104	0.000596	4.61052	-0.206075	1.06149	64859	nucleic acid binding protein 1	NABP1	6.13759	6.40301	7.13967	6.27847	6.5062	5.9985	4.69384	5.65607	5.52564	5.66318	4.83607	5.71969
6304_at	0.0104	0.000597	-4.60976	-0.207388	-1.02031	6304	SATB homeobox 1	SATB1	5.55682	5.87263	5.55545	5.05726	6.07846	4.56941	6.63488	6.52601	6.69985	6.26934	6.2205	6.46132
3557_at	0.0104	0.000601	4.60535	-0.214993	1.44498	3557	interleukin 1 receptor antagonist	IL1RN	6.81535	7.31159	7.29354	7.70674	8.78849	7.78834	5.68694	5.75622	6.05016	7.07256	6.28214	6.18619
100507117_at	0.0106	0.000618	4.58984	-0.24179	1.59634	100507117	ASAP1 intronic transcript 2 (non-protein coding)		4.72335	3.27234	4.14314	4.10296	5.23437	5.18091	2.32702	3.40999	3.45018	2.91574	2.12023	2.85588
55653_at	0.0106	0.000621	-4.58681	-0.24702	-1.33831	55653	breast carcinoma amplified sequence 4	BCAS4	3.46805	4.87514	4.23707	3.75048	4.4839	3.85443	6.33518	4.91534	6.00142	5.1716	5.24269	5.03272
2352_at	0.0106	0.000622	4.58601	-0.248404	1.52262	2352	folate receptor 3 (gamma)	FOLR3	6.30648	6.49038	7.0292	8.06416	6.46003	6.47153	4.31529	5.28973	5.51961	5.88806	5.75165	4.92173
79772_at	0.0107	0.000639	4.57024	-0.275686	1.21114	79772	multiple C2 domains, transmembrane 1	MCTP1	6.06995	5.3641	5.80493	6.61648	5.99226	6.55541	3.94035	5.17708	4.52322	5.30719	5.09145	5.09697
51175_at	0.0107	0.000643	-4.56608	-0.282883	-1.08952	51175	tubulin, epsilon 1	TUBE1	3.13418	3.73905	3.89592	3.43732	3.2196	2.48813	4.67067	4.63565	4.3591	4.26273	3.73553	4.78764
166_at	0.0108	0.000654	-4.55683	-0.298897	-1.0926	166	amino-terminal enhancer of split	TLE5	6.17027	7.35166	6.89776	5.66827	6.90789	6.3557	7.94886	7.60003	7.67908	7.37606	7.65477	7.64835
118932_at	0.0108	0.000655	4.55548	-0.301238	2.31396	118932	ankyrin repeat domain 22	ANKRD22	4.03691	6.24604	7.25212	5.7223	4.12486	4.16745	3.04021	2.92722	3.18613	2.84726	2.93611	2.72899
133_at	0.0108	0.000657	4.55421	-0.303441	1.87156	133	adrenomedullin	ADM	6.91319	8.18638	7.87972	8.40478	9.28077	8.18768	5.90236	6.85919	6.28604	7.48637	5.73947	5.34971
399665_at	0.011	0.000673	-4.53985	-0.328331	-2.2441	399665	family with sequence similarity 102, member A	FAM102A	5.80742	6.20667	5.51848	3.82176	6.92291	3.76363	8.12726	7.45607	7.74567	7.40673	7.29098	7.47874
4689_at	0.0111	0.00068	4.53418	-0.338157	1.09679	4689	neutrophil cytosolic factor 4, 40kDa	NCF4	10.1625	9.76948	9.95297	10.1283	10.8583	10.0002	8.22441	9.01305	9.20594	9.83459	8.90554	9.10746
360_at	0.0111	0.000681	-4.53362	-0.339128	-2.03197	360	aquaporin 3 (Gill blood group)	AQP3	4.68147	4.96852	4.28254	3.78548	6.56979	3.51835	7.3821	6.5657	7.15071	6.11587	6.26164	6.52194
83666_at	0.0113	0.000706	4.51236	-0.376048	1.10953	83666	poly (ADP-ribose) polymerase family, member 9	PARP9	6.97553	6.99516	6.8116	6.8464	8.26092	7.15004	5.61134	6.13265	6.31008	6.5937	5.81507	5.91964
6732_at	0.0113	0.000707	4.51206	-0.376559	1.22957	6732	SRSF protein kinase 1	SRPK1	5.72114	7.13137	7.10439	6.46531	5.95139	6.41444	4.92332	5.07725	5.13581	6.07892	4.91148	5.28385
11213_at	0.0113	0.000707	4.51155	-0.377452	1.72848	11213	interleukin-1 receptor-associated kinase 3	IRAK3	7.08187	8.09063	8.75021	7.94946	6.16422	8.64372	5.86863	6.2868	6.16489	6.29998	6.04663	5.64227
3998_at	0.0115	0.000739	-4.48623	-0.421493	-1.07655	3998	lectin, mannose-binding, 1	LMAN1	3.41435	4.40369	4.07729	4.03628	3.74351	3.50477	5.069	5.04772	5.82133	4.46226	4.43133	4.80753
9834_at	0.0115	0.000741	-4.4851	-0.423448	-1.6592	9834	KIAA0125		4.3227	2.11132	1.94853	2.69005	2.2584	2.04782	4.56759	4.05881	4.46867	3.91387	3.65184	4.67326
5337_at	0.0121	0.000795	4.44486	-0.493601	1.07507	5337	phospholipase D1, phosphatidylcholine-specific	PLD1	4.46122	4.28083	5.3142	5.5607	3.93681	4.50369	3.52123	3.60803	3.48509	3.48488	3.80999	3.69785
4835_at	0.0122	0.000811	4.43354	-0.513363	1.12088	4835	NAD(P)H dehydrogenase, quinone 2	NQO2	9.64335	10.0577	9.83463	9.2058	8.84997	9.88968	8.15451	8.22804	7.99958	9.12067	8.21832	9.03477
6484_at	0.0122	0.000812	4.43294	-0.514414	1.4105	6484	ST3 beta-galactoside alpha-2,3-sialyltransferase 4	ST3GAL4	4.52952	6.22857	6.18501	6.16927	6.3493	6.61602	4.54059	4.46904	4.33785	5.40002	4.56574	4.30146
5768_at	0.0123	0.000816	4.42968	-0.52011	1.20822	5768	quiescin Q6 sulfhydryl oxidase 1	QSOX1	5.73602	6.79067	7.59278	7.45982	6.92911	7.0985	5.87799	5.3417	5.70332	6.02721	5.99716	5.41021
5023_at	0.0124	0.000832	4.41878	-0.539157	1.32509	5023	purinergic receptor P2X, ligand-gated ion channel, 1	P2RX1	7.06621	7.28298	8.03584	6.98781	6.11435	7.03578	5.81633	4.78625	5.72299	5.97088	6.20341	6.07256
822_at	0.0124	0.000835	4.4171	-0.542095	1.024	822	capping protein (actin filament), gelsolin-like	CAPG	7.16948	6.96163	7.75361	8.08603	6.96764	7.68684	6.79057	6.15339	6.06556	6.04424	6.9724	6.45505
728489_at	0.0124	0.000839	-4.41422	-0.547133	-1.02067	728489	DNL-type zinc finger	DNLZ	5.11634	6.45939	6.13053	5.53455	5.93122	6.07998	7.26082	6.47249	6.57502	7.3123	6.61305	7.14232
84319_at	0.0124	0.00084	-4.4134	-0.54856	-1.13698	84319	cms1 ribosomal small subunit homolog (yeast)	CMSS1	3.37558	4.59165	4.04117	3.49249	3.67331	3.03328	5.3916	5.10107	4.86188	4.52107	4.24466	4.90907
150864_at	0.0126	0.000855	-4.40313	-0.566534	-1.21129	150864	family with sequence similarity 117, member B	FAM117B	5.68429	4.94718	4.24205	5.85378	5.30213	5.99192	6.99273	6.26398	6.8631	6.57633	6.32027	6.27269
6675_at	0.0126	0.000856	-4.40242	-0.567774	-1.03264	6675	UDP-N-acetylglucosamine pyrophosphorylase 1	UAP1	4.83556	5.32502	4.77013	5.00735	5.38943	3.91964	6.10167	6.05829	6.3234	5.78152	5.40587	5.77226
79652_at	0.0127	0.000868	-4.3946	-0.581473	-1.31261	79652	transmembrane protein 204	TMEM204	3.8208	4.20649	3.92814	2.79718	4.52078	3.45195	6.0166	4.42469	4.98082	5.07136	4.95251	5.15504
10219_at	0.013	0.000895	-4.37739	-0.611624	-2.00061	10219	killer cell lectin-like receptor subfamily G, member 1	KLRG1	5.09442	7.09161	6.33081	5.26809	6.31471	3.79667	8.05957	7.69962	7.78581	7.00202	7.67378	7.67915
5447_at	0.0132	0.000921	4.36102	-0.640333	1.11047	5447	P450 (cytochrome) oxidoreductase	POR	4.79601	6.42487	6.5951	5.69487	6.08876	6.29556	4.78798	4.78502	4.86192	5.15671	4.89692	4.74378
163882_at	0.0133	0.000936	-4.35182	-0.656488	-1.00638	163882	consortin, connexin sorting protein	CNST	5.70129	4.61392	4.78052	4.62294	4.87029	3.83906	5.91897	5.75007	5.51412	5.76918	5.70655	5.80739
401466_at	0.0133	0.000938	-4.35066	-0.658533	-1.137	401466	chromosome 8 open reading frame 59	RBIS	4.23811	4.59662	4.51871	5.40403	5.03981	4.23159	6.61173	5.47337	5.79483	5.29739	6.22755	5.44599
9806_at	0.0136	0.000976	-4.3281	-0.698181	-1.49376	9806	sparc/osteonectin, cwcv and kazal-like domains proteoglycan (testican) 2	SPOCK2	4.38712	5.50549	4.82875	3.74389	5.44173	3.42344	6.54699	5.92529	6.33854	5.83987	5.91309	5.7292
56911_at	0.0137	0.000986	-4.32245	-0.708112	-2.05876	56911	MAP3K7 C-terminal like	MAP3K7CL	8.05256	5.57031	6.02815	5.89072	4.80209	5.46483	8.54382	8.15624	6.99058	8.29735	7.55369	8.61953
10100_at	0.0138	0.000997	4.31603	-0.719413	1.50763	10100	tetraspanin 2	TSPAN2	7.76926	8.0419	8.86481	8.13976	7.20662	6.66949	5.72865	6.59514	5.53538	6.89503	6.34668	6.54519
3702_at	0.0139	0.001	-4.31209	-0.726344	-1.39538	3702	IL2-inducible T-cell kinase	ITK	4.99456	6.36314	5.7988	4.49892	5.87931	4.2684	6.80027	6.75039	6.81737	6.52747	6.36991	6.91002
55096_at	0.0144	0.00105	4.28883	-0.767321	1.44622	55096	endogenous Bornavirus-like nucleoprotein 2	EBLN2	5.70955	6.04989	6.89361	5.65147	6.72242	6.58272	3.85083	4.81479	5.52011	4.94568	4.14124	5.65972
117145_at	0.0144	0.00105	-4.28801	-0.768758	-1.023	117145	thioesterase superfamily member 4	THEM4	2.92556	3.17772	3.01647	2.6864	3.68371	2.2923	3.90809	4.0534	4.55319	3.40401	3.66159	4.33989
2934_at	0.0144	0.00105	4.28602	-0.772269	1.12212	2934	gelsolin	GSN	8.72442	8.03677	8.52477	9.80818	9.27538	8.89056	7.76347	7.48411	7.39508	8.19654	8.09328	7.59483
168374_at	0.0145	0.00106	-4.27972	-0.783388	-1.55133	168374	zinc finger protein 92	ZNF92	3.77493	4.94392	4.21188	3.87227	4.72709	2.44095	5.89852	5.93928	5.7149	5.19898	5.00226	5.52505
7130_at	0.015	0.00112	4.25246	-0.831507	1.53956	7130	tumor necrosis factor, alpha-induced protein 6	TNFAIP6	8.51031	9.16684	9.48477	9.33462	10.0311	8.7893	7.60585	8.17361	7.47121	8.99756	6.76701	7.06427
1089_at	0.0151	0.00114	4.24269	-0.848773	1.59463	1089	carcinoembryonic antigen-related cell adhesion molecule 4	CEACAM4	6.86039	7.27426	8.11201	7.96879	7.55024	6.80685	4.7062	5.78712	5.23356	6.89829	5.68242	6.69718
8718_at	0.0156	0.0012	-4.21166	-0.903664	-1.42346	8718	tumor necrosis factor receptor superfamily, member 25	TNFRSF25	3.19006	4.16006	4.26561	3.25654	4.17641	2.46929	4.55027	4.86124	5.49271	4.8744	4.47096	5.80919
9500_at	0.0157	0.00121	-4.20652	-0.912761	-1.10231	9500	melanoma antigen family D, 1	MAGED1	5.30415	6.65056	6.10632	5.11933	5.72587	4.90061	6.75017	6.74114	6.97591	6.31856	6.82322	6.81171
23200_at	0.0158	0.00122	4.20277	-0.919412	1.06739	23200	ATPase, class VI, type 11B	ATP11B	5.39978	6.86723	7.08795	6.02938	6.03126	5.84759	5.19744	5.25748	5.11123	5.43856	4.83046	5.02366
8277_at	0.0158	0.00122	-4.20032	-0.92375	-1.19797	8277	transketolase-like 1	TKTL1	3.782	3.17578	2.62972	2.53577	3.90759	2.22175	4.70974	4.37143	4.04394	3.98565	3.92688	4.40281
28660_at	0.0158	0.00123	-4.19863	-0.926743	-1.19401	28660	T cell receptor alpha variable 23/delta variable 6		2.37891	2.1545	2.26619	1.92631	2.34882	2.1009	4.3333	3.45445	3.54711	2.78953	2.30813	3.90717
90701_at	0.0159	0.00123	-4.19615	-0.931144	-1.33436	90701	SEC11 homolog C (S. cerevisiae)	SEC11C	5.6621	6.85053	6.44793	6.72053	6.24642	5.75499	7.93259	7.57528	8.83889	6.96672	7.1655	7.20969
6809_at	0.016	0.00124	4.19136	-0.939638	1.00096	6809	syntaxin 3	STX3	7.54843	7.3444	7.48465	7.47605	8.25799	7.03714	5.75479	6.71179	6.50488	7.24752	6.33776	6.58617
6723_at	0.016	0.00125	-4.18999	-0.942067	-1.01108	6723	spermidine synthase	SRM	5.34624	6.92288	6.42218	5.88371	5.85718	6.63489	7.52908	7.0969	7.50548	6.9263	7.01047	7.06534
58484_at	0.016	0.00125	4.18928	-0.943317	1.37678	58484	NLR family, CARD domain containing 4	NLRC4	2.61863	4.08393	4.29792	4.4792	2.67969	4.30116	2.26038	2.7321	2.2507	2.35031	2.33947	2.26688
140803_at	0.0162	0.00127	4.17974	-0.960246	1.05764	140803	transient receptor potential cation channel, subfamily M, member 6	TRPM6	4.0081	3.48597	3.19611	4.89827	3.84875	3.74846	2.4305	2.83835	2.44575	3.01302	2.80962	3.30261
3240_at	0.0162	0.00127	4.17773	-0.963806	3.87053	3240	haptoglobin	HP	6.52338	10.3837	11.4826	10.8713	5.78057	8.66046	5.25581	3.97379	5.797	5.94316	4.85962	4.64946
151056_at	0.0162	0.00128	4.17536	-0.968007	1.92809	151056	phospholipase B1	PLB1	4.00758	6.12489	6.15786	6.94907	4.09791	6.01694	3.45077	3.37511	3.78686	3.86176	3.43085	3.88037
3687_at	0.0162	0.00128	4.17491	-0.968816	1.11076	3687	integrin, alpha X (complement component 3 receptor 4 subunit)	ITGAX	5.27555	5.02418	5.16264	5.10822	6.26793	5.46482	3.4071	4.60694	4.90028	4.57203	4.1822	3.9702
58528_at	0.0164	0.0013	4.16819	-0.980736	1.06014	58528	Ras-related GTP binding D	RRAGD	7.9282	7.34007	7.93586	8.54865	8.47553	7.24161	6.7993	6.6443	6.51384	7.58598	6.96906	6.59659
383_at	0.0165	0.00132	4.15958	-0.996022	3.11625	383	arginase 1	ARG1	6.71008	9.23189	9.58223	9.46127	4.96904	7.77866	4.79832	4.50975	4.59658	6.36864	4.72092	4.04147
9172_at	0.0168	0.00134	-4.15051	-1.01214	-1.27145	9172	myomesin 2	MYOM2	3.12682	3.19424	3.05304	2.92236	2.91187	3.87708	3.79351	5.49888	4.49811	3.69572	4.09867	5.12926
54532_at	0.0168	0.00134	-4.14861	-1.01551	-1.18248	54532	ubiquitin specific peptidase 53	USP53	2.76738	2.97309	3.01299	2.45733	3.0902	2.55882	4.23547	4.03803	5.27779	3.46532	3.49279	3.44531
1117_at	0.0169	0.00136	-4.14063	-1.02969	-1.35142	1117	chitinase 3-like 2	CHI3L2	3.0766	4.85219	4.19231	2.94699	3.42791	3.14157	5.17207	4.3727	5.00094	4.52522	5.51626	5.15894
89894_at	0.0169	0.00136	-4.14035	-1.0302	-1.22214	89894	transmembrane protein 116	TMEM116	4.85347	5.39448	5.17667	4.47628	5.50582	3.63097	6.54492	6.2317	5.67534	5.61326	6.13572	6.16959
10170_at	0.0169	0.00137	4.13922	-1.03219	2.23859	10170	dehydrogenase/reductase (SDR family) member 9	DHRS9	8.41478	10.4389	11.2719	9.80011	9.69755	7.91828	6.3864	6.77654	7.4783	8.139	7.10553	8.22414
3017_at	0.0171	0.00139	4.12869	-1.05093	1.06245	3017	histone cluster 1, H2bd	H2BC5	7.39633	7.39088	7.75564	7.7397	7.77568	6.49241	6.4818	7.03587	5.93253	6.6226	6.38087	5.72226
63979_at	0.0173	0.00142	-4.11748	-1.07087	-1.06478	63979	fidgetin-like 1	FIGNL1	3.52188	4.35708	3.73215	4.83946	4.00158	3.43231	5.49981	5.40568	4.9222	4.49212	4.63212	5.32122
28711_at	0.0176	0.00145	-4.10673	-1.09001	-1.00346	28711	T cell receptor alpha joining 44		2.5013	2.73893	2.51873	2.27699	3.02061	2.61015	3.41	3.52895	4.11819	3.89439	2.5682	4.16772
144423_at	0.0176	0.00145	4.10368	-1.09545	1.03262	144423	glycosyltransferase 1 domain containing 1	GLT1D1	6.30327	6.43804	6.63299	6.429	7.08397	6.61067	4.81544	5.45416	5.25159	6.64271	5.66651	5.47181
266747_at	0.018	0.0015	4.08629	-1.12643	1.74695	266747	ral guanine nucleotide dissociation stimulator-like 4	RGL4	7.59486	9.92386	10.4608	9.69449	9.30019	8.47342	7.49062	7.09429	7.40371	8.38663	7.42643	7.16431
23178_at	0.018	0.00151	-4.08267	-1.13289	-1.19021	23178	PAS domain containing serine/threonine kinase	PASK	3.11373	2.64909	2.56985	2.23967	3.35203	2.60668	5.28115	3.54659	3.59886	3.83349	3.73975	3.67245
1407_at	0.0181	0.00153	-4.07574	-1.14524	-1.22587	1407	cryptochrome circadian clock 1	CRY1	4.60054	4.91107	4.83183	3.98182	4.63838	2.96549	5.95253	5.19074	5.59083	5.62045	5.18569	5.74409
290_at	0.0182	0.00153	4.07441	-1.14762	1.0334	290	alanyl (membrane) aminopeptidase	ANPEP	8.94229	8.6874	8.86251	8.46109	9.01051	9.18252	7.07064	7.21649	7.98713	8.80111	7.92678	7.94375
55755_at	0.0182	0.00154	4.07173	-1.1524	1.63051	55755	CDK5 regulatory subunit associated protein 2	CDK5RAP2	5.10214	8.05797	7.78152	6.47254	6.64633	7.10916	5.0123	5.3747	5.35277	5.12801	5.3024	5.21643
51207_at	0.0183	0.00155	4.06892	-1.15742	1.04738	51207	dual specificity phosphatase 13	DUSP13	3.46417	3.75249	4.60423	4.64235	3.74322	2.93528	2.7695	2.6387	2.68459	2.86082	3.09753	2.80634
2323_at	0.0183	0.00156	-4.06629	-1.16211	-1.58801	2323	fms-related tyrosine kinase 3 ligand	FLT3LG	4.13025	5.08103	4.46537	3.4506	5.85513	3.30574	6.68911	5.6824	5.99051	5.70525	5.92352	5.82538
1889_at	0.0186	0.00159	4.05467	-1.18285	1.03469	1889	endothelin converting enzyme 1	ECE1	6.44667	6.16187	6.20347	6.23733	7.14662	6.82766	5.00543	5.16292	5.48202	6.53155	5.38794	5.24562
50486_at	0.0187	0.0016	4.0501	-1.19101	1.47885	50486	G0/G1 switch 2	G0S2	4.17373	5.1218	6.09683	3.86815	4.96948	3.74347	3.09655	2.8406	3.2707	3.73624	2.74778	3.40851
23569_at	0.0187	0.00161	4.04619	-1.19799	1.26775	23569	peptidyl arginine deiminase, type IV	PADI4	9.92172	9.86561	10.5897	10.9827	8.92082	9.69273	8.24953	8.25304	9.04998	9.2222	8.59806	8.99401
8876_at	0.0188	0.00162	4.04478	-1.20051	1.90068	8876	vanin 1	VNN1	3.25255	5.25429	5.94009	5.17608	3.16279	5.8449	2.75187	3.00478	2.73606	3.08937	2.84766	2.79689
51380_at	0.0188	0.00162	4.04312	-1.20348	1.17791	51380	cysteine sulfinic acid decarboxylase	CSAD	5.27278	4.60333	4.81622	5.43984	5.86155	5.27238	2.94983	4.42004	4.53361	4.1996	3.60239	4.49318
7378_at	0.0188	0.00162	4.04279	-1.20407	1.29449	7378	uridine phosphorylase 1	UPP1	7.00931	8.98043	9.09117	8.00602	7.39969	8.53922	6.76952	6.99335	6.80269	6.85658	6.93238	6.90436
259197_at	0.0189	0.00164	-4.0377	-1.21316	-1.18172	259197	natural cytotoxicity triggering receptor 3	NCR3	2.89145	4.46712	3.78655	4.01822	3.91301	3.2057	5.77059	5.19726	4.62274	4.38253	4.45027	4.94898
55062_at	0.0189	0.00164	4.03655	-1.21523	1.12081	55062	WD repeat domain, phosphoinositide interacting 1	WIPI1	8.11857	8.02905	8.58788	7.58842	7.1649	6.78619	6.24141	6.39678	6.32456	6.8118	7.06887	6.70672
55002_at	0.0189	0.00165	4.03318	-1.22123	1.01969	55002	transmembrane and coiled-coil domains 3	TMCO3	7.8979	9.02327	9.11327	8.65797	7.50453	8.48081	7.53644	7.64569	7.22108	7.68173	7.24056	7.23411
114804_at	0.0192	0.00169	-4.0188	-1.24695	-1.25756	114804	ring finger protein 157	RNF157	3.9562	4.69277	4.32447	3.39002	5.36901	3.17644	5.39407	5.28343	5.5327	5.31484	5.63396	5.29527
374907_at	0.0192	0.0017	4.0175	-1.24927	1.01637	374907	UDP-GlcNAc:betaGal beta-1,3-N-acetylglucosaminyltransferase 8	B3GNT8	6.65903	6.03368	6.42571	6.99447	7.55459	6.69631	5.30224	5.27186	5.45671	6.30992	6.03368	5.89118
54790_at	0.0194	0.00172	4.00927	-1.26401	1.11429	54790	tet methylcytosine dioxygenase 2	TET2	6.73254	6.14042	6.16733	6.9445	7.60192	6.89763	5.26535	5.95275	5.32607	6.49002	5.52842	5.23601
27065_at	0.0194	0.00173	-4.00697	-1.26812	-1.45201	27065	neuron specific gene family member 1	NSG1	2.78819	3.01228	2.60066	2.37481	3.30823	2.47415	5.04073	4.37301	4.96104	2.68683	3.63561	4.57318
2841_at	0.0196	0.00175	-4.00001	-1.28058	-2.02676	2841	G protein-coupled receptor 18	GPR18	5.832	8.14235	7.31098	6.26652	6.50396	4.37486	9.07898	8.41258	8.73803	8.0316	7.96895	8.36109
3493_at	0.0197	0.00176	-3.99671	-1.28648	-2.77239	3493	immunoglobulin heavy constant alpha 1		5.82664	5.07292	4.92369	4.81154	4.41442	5.08258	7.42319	7.64716	10.9778	5.88616	6.41248	8.41933
79660_at	0.02	0.00179	3.98732	-1.30329	1.20417	79660	protein phosphatase 1, regulatory subunit 3B	PPP1R3B	7.6091	7.79241	7.53954	7.41848	8.8794	7.67464	5.87634	6.64862	6.45481	7.69211	6.34808	6.66859
9521_at	0.02	0.00179	-3.98691	-1.30404	-1.04354	9521	eukaryotic translation elongation factor 1 epsilon 1	EEF1E1	5.97409	7.10435	6.633	6.9767	6.09564	5.78688	8.13148	7.33124	7.78153	6.95828	7.42438	7.205
84034_at	0.0203	0.00185	3.97112	-1.33234	1.33568	84034	elastin microfibril interfacer 2	EMILIN2	7.18398	8.351	8.72458	8.15896	6.87582	9.15742	6.64769	6.97465	6.85066	6.69768	6.72755	6.53946
366_at	0.0204	0.00186	3.96793	-1.33805	1.12584	366	aquaporin 9	AQP9	7.52504	7.93684	8.23792	7.6163	8.72977	7.71457	6.50718	6.91256	6.44503	8.01158	6.65117	6.47789
51314_at	0.0205	0.00188	3.96183	-1.34899	1.44696	51314	NME/NM23 family member 8	NME8	3.83807	5.37719	5.64786	5.28404	3.46069	5.31222	3.0734	3.97644	3.3131	3.2801	3.21039	3.38485
4128_at	0.0205	0.00188	3.96062	-1.35116	1.61602	4128	monoamine oxidase A	MAOA	5.18648	5.42175	5.01051	3.38891	2.78674	4.63571	2.66002	2.50206	2.96829	2.79058	3.10434	2.70868
4001_at	0.0209	0.00193	3.94675	-1.37604	1.00574	4001	lamin B1	LMNB1	4.30977	5.16425	4.94157	5.77956	5.81874	5.7349	4.23606	4.50329	4.2545	4.74136	4.12764	3.85151
1441_at	0.0213	0.00199	3.92934	-1.40729	1.13085	1441	colony stimulating factor 3 receptor (granulocyte)	CSF3R	9.64207	9.29409	9.16943	9.63385	10.55	9.89226	7.51055	8.73576	8.69729	9.2819	8.43369	8.73743
29121_at	0.0214	0.002	-3.92768	-1.41027	-1.08376	29121	C-type lectin domain family 2, member D	CLEC2D	4.65887	5.65849	5.29656	4.25165	5.26618	4.22873	5.98325	6.02001	6.52622	5.61995	5.38991	6.32372
972_at	0.0214	0.00201	-3.9248	-1.41544	-1.08696	972	CD74 molecule, major histocompatibility complex, class II invariant chain	CD74	8.42277	8.20466	7.48968	9.50759	8.05256	8.99637	9.61402	9.59778	9.78994	9.28591	9.49479	9.41296
7374_at	0.0214	0.00201	-3.92437	-1.41621	-1.10304	7374	uracil-DNA glycosylase	UNG	4.06661	5.30626	4.88174	4.82754	4.84887	3.52622	6.37429	5.55068	5.68278	5.31035	5.49832	5.65908
57126_at	0.0215	0.00202	3.92043	-1.42329	5.16035	57126	CD177 molecule	CD177	4.22613	11.4295	11.6684	9.81797	3.7132	8.49956	2.96994	2.76194	2.23686	3.66377	3.54215	3.21805
1236_at	0.0222	0.00212	-3.89426	-1.47032	-3.80308	1236	chemokine (C-C motif) receptor 7	CCR7	7.76056	6.95632	6.49418	3.25392	9.04717	2.43055	10.217	9.71082	10.0517	9.7838	9.25651	9.74132
5872_at	0.0224	0.00214	3.8898	-1.47836	1.48442	5872	RAB13, member RAS oncogene family	RAB13	5.06026	4.73701	4.92142	7.07566	6.07733	6.42162	4.35185	3.93698	4.44145	4.74618	4.21984	3.69048
83857_at	0.023	0.00223	3.86735	-1.51876	2.00211	83857	transmembrane and tetratricopeptide repeat containing 1	TMTC1	4.87268	5.55831	6.15217	3.66122	3.42116	6.66278	2.23344	3.46767	3.14419	3.27347	3.21096	2.98589
2131_at	0.023	0.00223	3.86654	-1.5202	1.25882	2131	exostosin glycosyltransferase 1	EXT1	5.38092	7.11103	7.21983	6.57971	5.6701	7.34469	5.34534	5.61662	5.27688	5.39547	5.10998	5.00909
916_at	0.023	0.00223	-3.86571	-1.5217	-1.09976	916	CD3e molecule, epsilon (CD3-TCR complex)	CD3E	3.57725	4.331	3.88241	2.71058	4.04213	2.70849	5.20348	4.45534	4.75851	4.47194	4.62907	4.33207
6037_at	0.0233	0.00227	3.85589	-1.53938	2.31624	6037	ribonuclease, RNase A family, 3	RNASE3	6.13898	5.95364	7.30656	9.22609	5.31472	5.32192	4.48648	3.16516	4.21975	4.10183	4.8101	4.58115
9123_at	0.0233	0.00228	3.85354	-1.54361	1.49276	9123	solute carrier family 16 (monocarboxylate transporter), member 3	SLC16A3	5.76894	6.98237	7.35052	7.57363	8.04886	7.93146	5.21851	6.18058	5.6424	6.76396	5.76031	5.13348
10516_at	0.0234	0.0023	-3.84978	-1.55038	-1.58414	10516	fibulin 5	FBLN5	4.91767	4.89994	4.9172	3.53321	4.81312	2.7189	5.64466	5.25868	6.19498	5.53279	5.83539	6.8384
6504_at	0.0234	0.0023	-3.84898	-1.55183	-1.14492	6504	signaling lymphocytic activation molecule family member 1	SLAMF1	3.13199	3.75705	3.41677	2.78642	4.56611	2.84273	4.54327	4.78897	4.96884	3.88853	4.25902	4.92199
122060_at	0.0237	0.00234	-3.83946	-1.56899	-1.20132	122060	SLAIN motif family, member 1	SLAIN1	3.32269	4.81868	3.98476	4.18166	3.87937	2.65176	5.65366	5.05581	5.14338	4.85226	4.5758	4.76596
80008_at	0.0239	0.00237	-3.83218	-1.58211	-1.4238	80008	transmembrane protein 156	TMEM156	2.83693	3.77905	3.14873	2.66684	4.70845	2.35403	4.69495	5.02375	5.08819	3.84735	4.36194	5.02063
81539_at	0.0248	0.00249	-3.80568	-1.62989	-1.30534	81539	solute carrier family 38, member 1	SLC38A1	4.8662	6.22093	5.76735	5.07634	5.60865	3.71814	6.73368	6.75637	6.73533	6.2086	6.23316	6.42247
55022_at	0.0249	0.0025	-3.80321	-1.63436	-1.326	55022	phosphotyrosine interaction domain containing 1	PID1	3.88346	3.00744	2.64868	4.2722	2.88267	4.7424	4.78638	5.07308	4.88591	4.36939	5.51889	4.75921
9840_at	0.025	0.00252	-3.79918	-1.64163	-1.60201	9840	thymocyte expressed, positive selection associated 1	TESPA1	5.27553	5.75749	5.17534	3.76013	5.67417	3.11774	6.3138	6.40869	6.88257	6.18323	6.07789	6.50625
6283_at	0.0252	0.00256	3.79006	-1.65809	1.43239	6283	S100 calcium binding protein A12	S100A12	10.972	12.6752	12.9253	12.8034	10.7831	12.0628	10.7144	10.7685	10.1996	11.0805	10.6764	10.1881
84106_at	0.0253	0.00258	3.78691	-1.66378	1.20015	84106	PML-RARA regulated adaptor molecule 1	PRAM1	7.72186	7.00226	8.02872	8.05901	7.33185	8.27614	5.14972	6.7691	6.96904	6.60468	6.89799	6.82843
340120_at	0.0257	0.00263	3.776	-1.68349	1.88292	340120	ankyrin repeat domain 34B	ANKRD34B	3.94421	5.66573	6.66336	4.59872	3.308	3.7384	2.3855	3.08368	2.99457	3.16313	2.27285	2.72115
939_at	0.0261	0.0027	-3.76094	-1.71069	-2.61523	939	CD27 molecule	CD27	6.29669	7.94805	7.19718	4.29124	7.59835	3.54951	9.22753	8.75773	9.20672	8.39696	8.35602	8.62741
85462_at	0.0263	0.00273	3.75533	-1.72083	1.44996	85462	FH2 domain containing 1	FHDC1	5.62517	6.42444	5.09404	4.22227	4.22816	4.05567	2.99264	3.45797	3.49369	3.61627	4.18234	3.20711
120224_at	0.0266	0.00278	3.74579	-1.73806	1.00993	120224	transmembrane protein 45B	TMEM45B	4.95646	4.23687	4.13286	5.18368	4.4256	5.25476	3.10924	3.45264	3.76205	4.58912	3.35598	3.86161
81606_at	0.0266	0.00279	-3.74439	-1.7406	-2.04592	81606	limb bud and heart development	LBH	7.05078	7.22401	6.58746	5.75006	6.6024	3.49114	8.91645	8.04621	8.23295	7.42561	8.12994	8.23022
8809_at	0.0266	0.00279	3.74411	-1.7411	1.99272	8809	interleukin 18 receptor 1	IL18R1	4.50411	7.2166	7.68469	4.65292	4.82011	5.36073	3.31847	3.76707	3.78273	4.18834	3.38496	3.84126
6556_at	0.0267	0.0028	3.74169	-1.74549	1.37594	6556	solute carrier family 11 (proton-coupled divalent metal ion transporter), member 1	SLC11A1	6.20016	7.29244	7.70217	7.10055	6.13554	7.77203	4.73171	6.01918	5.86989	6.58659	5.05537	5.68452
9240_at	0.0267	0.00281	-3.74027	-1.74806	-1.04791	9240	paraneoplastic Ma antigen 1	PNMA1	5.25967	4.5569	4.84727	3.95539	3.79964	3.70252	5.96991	5.5596	5.07828	4.87896	5.61671	5.30537
4318_at	0.0269	0.00284	3.73461	-1.75829	2.35357	4318	matrix metallopeptidase 9 (gelatinase B, 92kDa gelatinase, 92kDa type IV collagenase)	MMP9	9.67806	12.4401	12.6313	11.8975	9.51903	11.0337	7.97932	7.47007	9.53713	10.2211	8.99883	8.87178
3566_at	0.0269	0.00284	3.73404	-1.75932	1.13016	3566	interleukin 4 receptor	IL4R	4.48972	6.55035	6.40799	5.87758	6.14737	5.82811	4.37236	4.73863	4.92589	5.27072	4.48676	4.72581
254102_at	0.0274	0.00291	3.72011	-1.78451	1.02598	254102	EH domain binding protein 1-like 1	EHBP1L1	7.356	6.72737	6.81296	7.3179	8.13035	7.7977	5.5878	6.6851	6.47585	6.6487	6.74177	5.84717
122402_at	0.0274	0.00291	3.71989	-1.78492	2.41318	122402	tudor domain containing 9	TDRD9	4.00025	6.55977	7.10444	4.55089	2.44135	4.40132	2.27202	2.75779	2.48117	2.10875	2.66802	2.29118
1039_at	0.0283	0.00306	-3.69307	-1.83344	-1.14057	1039	cerebellar degeneration-related protein 2, 62kDa	CDR2	4.83909	5.64142	5.15023	4.23747	5.35456	3.64121	6.16455	6.2753	6.2426	5.58502	5.48402	5.95593
11237_at	0.0284	0.00307	3.691	-1.8372	1.01057	11237	ring finger protein 24	RNF24	8.06187	7.73169	7.88307	7.80383	8.94423	8.12973	6.399	7.06481	7.25284	8.10288	6.78881	6.88269
27250_at	0.0284	0.00308	-3.69007	-1.83888	-1.02595	27250	programmed cell death 4 (neoplastic transformation inhibitor)	PDCD4	7.06655	6.88764	6.15215	6.74306	7.79295	6.04014	7.92294	8.35728	7.91105	7.83683	7.30605	7.50403
1429_at	0.0285	0.0031	-3.68641	-1.84551	-1.25119	1429	crystallin, zeta (quinone reductase)	CRYZ	3.92239	5.40569	4.94066	4.81452	4.2194	3.08221	5.86884	5.96893	5.83923	5.68089	5.53983	4.99425
27334_at	0.0286	0.00312	-3.68271	-1.85222	-2.75582	27334	purinergic receptor P2Y, G-protein coupled, 10	P2RY10	6.46594	5.67136	4.86987	2.87461	7.40567	2.44726	8.12855	7.71781	6.99055	7.76214	7.87641	7.79419
7325_at	0.0288	0.00314	-3.67878	-1.85932	-1.06822	7325	ubiquitin-conjugating enzyme E2E 2	UBE2E2	4.26796	4.00334	3.75739	5.10614	3.01307	4.7162	5.42699	5.25403	5.2765	4.85289	5.44133	5.02167
3122_at	0.0291	0.00319	-3.67057	-1.8742	-1.19197	3122	major histocompatibility complex, class II, DR alpha	HLA-DRA	10.2033	9.49811	8.81963	11.0898	9.33393	10.5266	11.3708	11.2821	11.0844	10.8082	11.0696	11.0081
84707_at	0.0296	0.0033	-3.65283	-1.90634	-1.8845	84707	brain expressed X-linked 2	BEX2	4.83523	5.89163	5.47829	3.52663	5.46657	2.82513	7.73298	6.52181	6.59715	5.93301	6.05451	6.491
5608_at	0.0301	0.00338	3.63979	-1.92999	1.69489	5608	mitogen-activated protein kinase kinase 6	MAP2K6	6.2404	8.99809	9.54353	7.17104	7.32916	7.59242	6.22908	6.33448	6.29627	6.0798	5.88495	5.88069
23601_at	0.0301	0.00339	3.63793	-1.93335	1.25962	23601	C-type lectin domain family 5, member A	CLEC5A	2.94493	3.73929	5.03206	4.29903	2.61193	3.10746	2.32781	2.56383	2.42789	2.2418	2.2974	2.31828
8460_at	0.0306	0.00346	3.62633	-1.95439	1.29786	8460	tyrosylprotein sulfotransferase 1	TPST1	5.84588	6.04458	6.04822	4.21757	5.4747	6.3444	4.01204	3.90146	4.1455	5.47926	4.41952	4.23042
921_at	0.0308	0.0035	-3.61937	-1.96701	-1.24709	921	CD5 molecule	CD5	3.82347	4.73832	4.34495	3.03687	5.29351	3.17325	5.69896	5.08386	5.08446	5.36243	5.23098	5.4322
838_at	0.0309	0.00351	3.61789	-1.9697	1.82595	838	caspase 5, apoptosis-related cysteine peptidase	CASP5	3.61907	4.46215	3.61772	6.15527	6.52214	5.51637	2.74135	3.79462	3.32997	3.57104	2.78602	2.71402
7644_at	0.0312	0.00357	-3.60858	-1.9866	-1.15981	7644	zinc finger protein 91	ZNF91	7.03496	7.86911	7.51133	5.78319	6.90645	5.93628	7.81832	7.85982	7.89474	7.94396	8.2062	8.27716
4063_at	0.0315	0.00362	-3.60093	-2.00047	-1.6187	4063	lymphocyte antigen 9	LY9	4.5567	5.67154	5.33761	3.13498	4.75309	2.76755	6.17579	5.74805	6.24453	5.78512	5.73285	6.24731
100128252_at	0.0317	0.00367	-3.59394	-2.01315	-1.15116	100128252	ZNF667 antisense RNA 1 (head to head)		3.83424	2.70461	3.22548	2.79466	3.56213	2.4744	5.02212	4.81202	3.98182	3.22553	3.912	4.54896
3983_at	0.0317	0.00368	-3.59251	-2.01575	-1.93228	3983	actin binding LIM protein 1	ABLIM1	6.49318	6.79744	6.47006	4.92141	6.76145	3.30584	8.06212	7.74412	8.06931	7.31111	7.35714	7.79929
132299_at	0.032	0.00374	-3.58419	-2.03085	-1.9334	132299	OCIA domain containing 2	OCIAD2	4.09474	6.19796	5.58119	3.92969	6.00346	2.68706	7.36378	6.62428	6.87461	6.40864	6.45415	6.36905
116496_at	0.0323	0.00379	3.5774	-2.04318	1.21404	116496	family with sequence similarity 129, member A	NIBAN1	9.9575	10.0452	9.83762	10.4979	10.9001	10.2744	7.95333	9.48649	9.06452	10.2851	8.41805	9.02106
64167_at	0.0327	0.00385	-3.56868	-2.059	-1.63041	64167	endoplasmic reticulum aminopeptidase 2	ERAP2	6.2366	6.74126	6.19531	3.8084	4.70594	5.76776	6.66304	6.74685	7.87587	7.40815	7.70641	6.83739
164668_at	0.034	0.00412	3.5312	-2.12708	1.71296	164668	apolipoprotein B mRNA editing enzyme, catalytic polypeptide-like 3H	APOBEC3H	5.84671	5.60362	5.65852	4.28657	5.9969	2.76688	3.6451	3.47893	3.0288	3.38633	2.87731	3.46495
53938_at	0.0341	0.00413	-3.5298	-2.12962	-1.04919	53938	peptidylprolyl isomerase (cyclophilin)-like 3	PPIL3	6.43287	7.31425	7.01407	7.11184	6.89647	6.59521	8.7736	8.0314	6.61	7.88232	8.18761	8.17494
60675_at	0.0343	0.00418	3.52395	-2.14024	1.06763	60675	prokineticin 2	PROK2	9.64431	10.6533	10.6283	9.40126	10.6462	9.79729	8.61661	8.74001	9.14293	10.1374	8.71151	9.01641
8993_at	0.0347	0.00424	3.5158	-2.15505	2.42573	8993	peptidoglycan recognition protein 1	PGLYRP1	3.90967	5.93074	6.69179	8.7404	4.04531	6.03951	3.30905	2.98944	3.88772	4.15063	3.27361	3.1926
55423_at	0.0358	0.00445	-3.49011	-2.20174	-1.43716	55423	signal-regulatory protein gamma	SIRPG	3.89205	5.35315	4.49448	3.0776	5.4525	3.11168	6.07908	5.50068	6.07769	5.44734	5.3151	5.58455
9732_at	0.036	0.00447	3.48736	-2.20674	1.01401	9732	dedicator of cytokinesis 4	DOCK4	3.03295	3.21497	3.0328	3.24964	4.93876	3.15373	2.43372	2.42547	2.5052	2.7808	2.12215	2.27146
5055_at	0.0367	0.0046	3.47194	-2.23476	1.59398	5055	serpin peptidase inhibitor, clade B (ovalbumin), member 2	SERPINB2	5.02718	5.54081	7.30858	5.70724	3.88298	4.82587	4.50626	3.74016	3.93187	3.2384	3.93051	3.38157
1084_at	0.0371	0.00467	3.463	-2.25102	1.14683	1084	carcinoembryonic antigen-related cell adhesion molecule 3	CEACAM3	7.50443	6.79981	7.03195	8.31711	8.28234	7.58977	5.34643	6.43419	6.55335	7.29592	6.52031	6.49423
10538_at	0.0377	0.00479	3.44976	-2.27508	1.03804	10538	basic leucine zipper transcription factor, ATF-like	BATF	6.13222	8.20372	7.97012	7.55911	7.1866	7.14055	6.45985	6.85093	6.4376	6.06372	6.04128	6.11068
79746_at	0.0379	0.00482	3.44621	-2.28155	1.12893	79746	enoyl CoA hydratase domain containing 3	ECHDC3	6.12275	7.18926	7.35469	6.17024	5.51934	7.6088	5.71344	5.69985	5.58324	5.76948	5.20202	5.2235
64092_at	0.038	0.00487	3.44114	-2.29076	1.02796	64092	SAM domain, SH3 domain and nuclear localization signals 1	SAMSN1	7.99985	9.6163	9.89563	8.69836	8.11882	8.64191	7.90092	8.10696	7.62057	7.68428	7.80372	7.68667
8900_at	0.0381	0.00487	3.44033	-2.29224	1.45908	8900	cyclin A1	CCNA1	3.87235	2.88123	4.21921	4.71827	5.41212	2.52255	2.96815	2.112	2.52152	2.32376	2.31417	2.63163
10388_at	0.0381	0.00488	3.43997	-2.29289	1.19665	10388	synaptonemal complex protein 2	SYCP2	3.56644	5.41304	5.52643	4.51969	3.59665	3.96631	2.82023	3.32666	3.36661	3.58437	2.88434	3.42644
23348_at	0.0393	0.00511	-3.41506	-2.3382	-1.02394	23348	dedicator of cytokinesis 9	DOCK9	3.26254	4.66124	4.16784	3.04353	4.25106	2.86206	4.88339	4.95859	5.07727	4.5007	4.32864	4.64327
4317_at	0.0396	0.00516	3.40958	-2.34816	4.23947	4317	matrix metallopeptidase 8 (neutrophil collagenase)	MMP8	4.36198	9.15412	10.3894	9.97797	2.30805	6.36558	3.49557	2.23676	2.98433	2.24495	2.80861	3.35006
146330_at	0.0399	0.00522	-3.4027	-2.36067	-1.8509	146330	F-box and leucine-rich repeat protein 16	FBXL16	4.42574	5.67885	4.90812	2.69746	5.38876	2.26979	6.56474	6.37148	6.00297	5.85005	5.8242	5.86067
28639_at	0.0401	0.00527	-3.39843	-2.36844	-2.31417	28639	T cell receptor beta constant 1		9.16444	10.8175	10.1598	7.7443	10.3692	6.14192	11.73	11.4792	11.6045	11.1323	10.971	11.3652
27244_at	0.041	0.00543	-3.38212	-2.39811	-1.00632	27244	sestrin 1	SESN1	6.30359	5.72889	5.67534	5.33041	6.10713	4.84889	7.48302	7.06004	6.66225	5.87175	6.13927	6.81584
29851_at	0.0412	0.00548	-3.3774	-2.4067	-1.64975	29851	inducible T-cell co-stimulator	ICOS	4.19464	4.61255	3.7696	3.04246	5.9784	2.95734	6.59082	5.99724	6.03305	5.20891	4.72092	5.90257
7188_at	0.0414	0.00551	-3.37407	-2.41276	-1.33756	7188	TNF receptor-associated factor 5	TRAF5	4.32289	6.25008	5.84979	4.47763	5.17125	3.77158	6.30444	6.50753	6.64052	5.78367	5.75056	6.88187
85478_at	0.0414	0.00551	-3.37368	-2.41345	-1.64295	85478	coiled-coil domain containing 65	CCDC65	3.84137	5.05887	4.20295	2.54803	5.04735	2.08094	6.04194	5.38785	5.35013	5.24794	4.96563	5.64376
283234_at	0.0419	0.00563	3.36218	-2.43438	1.09088	283234	coiled-coil domain containing 88B	CCDC88B	7.16581	6.6244	6.74165	7.14257	7.85812	7.34991	4.82416	6.63283	6.79723	6.47281	5.63301	5.97713
54757_at	0.0419	0.00563	3.36217	-2.43439	1.66866	54757	family with sequence similarity 20, member A	FAM20A	2.44198	4.21897	5.75954	4.79093	2.43463	4.37927	2.244	2.35749	2.21081	2.38127	2.35636	2.46344
143689_at	0.042	0.00565	3.36006	-2.43823	1.40352	143689	piwi-like RNA-mediated gene silencing 4	PIWIL4	3.79842	3.61092	4.56026	6.57887	4.27757	4.83338	2.90284	3.32143	3.41092	2.68933	3.40717	3.50664
3679_at	0.0424	0.00573	3.35246	-2.45206	2.55963	3679	integrin, alpha 7	ITGA7	2.08722	4.96141	5.97831	5.21698	2.14392	7.08641	2.1508	1.92805	2.12926	1.93394	2.01316	1.96127
219670_at	0.0426	0.00578	-3.34831	-2.45961	-1.44232	219670	enkurin, TRPC channel interacting protein	ENKUR	5.3742	2.8642	3.09721	3.45039	2.8945	3.11563	5.68065	4.291	4.20409	5.53634	5.16983	4.56816
3394_at	0.0429	0.00585	-3.34211	-2.47088	-1.54886	3394	interferon regulatory factor 8	IRF8	6.93464	6.76587	6.65289	7.9459	4.67634	7.98897	8.48173	8.72545	8.54772	7.87442	8.33264	8.29583
5176_at	0.043	0.00586	-3.34032	-2.47414	-1.09201	5176	serpin peptidase inhibitor, clade F (alpha-2 antiplasmin, pigment epithelium derived factor), member 1	SERPINF1	3.30547	2.92181	3.0279	3.16542	3.02425	4.80568	4.31922	5.03576	5.04171	3.93726	4.5441	3.92454
8436_at	0.0439	0.00604	-3.32474	-2.50248	-2.66309	8436	serum deprivation response	CAVIN2	10.1859	6.63169	7.44844	7.57495	4.09986	5.26359	9.96931	9.2256	8.83496	9.56091	9.95962	9.63254
3081_at	0.0446	0.00617	-3.31334	-2.52321	-2.25309	3081	homogentisate 1,2-dioxygenase	HGD	6.47485	2.26497	2.64782	2.69833	3.32306	2.31374	5.65669	4.62534	4.78281	7.02088	5.80646	5.34915
321_at	0.0451	0.00627	-3.30455	-2.53919	-1.26037	321	amyloid beta (A4) precursor protein-binding, family A, member 2	APBA2	3.53258	4.8349	4.4997	2.75843	3.95715	2.43253	5.24498	4.69531	5.429	4.97617	4.41306	4.81896
932_at	0.0453	0.0063	3.30186	-2.54409	1.88187	932	membrane-spanning 4-domains, subfamily A, member 3 (hematopoietic cell-specific)	MS4A3	8.05813	6.79649	8.15345	9.96145	8.20475	6.83931	7.45183	5.57127	4.84198	5.43988	6.92414	6.49327
2015_at	0.0459	0.00644	3.28974	-2.56613	1.15635	2015	egf-like module containing, mucin-like, hormone receptor-like 1	ADGRE1	7.9947	7.41835	8.21118	7.10979	8.20551	6.62809	6.05889	6.7248	5.67032	6.63353	7.55009	5.9919
3109_at	0.0466	0.00657	-3.27888	-2.58588	-1.75015	3109	major histocompatibility complex, class II, DM beta	HLA-DMB	6.49892	5.3179	4.66433	8.38762	5.32123	7.25461	8.31153	7.94745	8.25075	7.84096	7.98675	7.60804
10045_at	0.0483	0.00695	-3.24847	-2.64116	-1.07482	10045	SH2 domain containing 3A	SH2D3A	2.2494	3.78047	3.54292	2.03657	3.79251	2.4194	4.69962	3.79337	3.96245	3.96695	3.87215	3.97562
64168_at	0.0486	0.00701	3.24404	-2.64921	1.58877	64168	N-terminal EF-hand calcium binding protein 1	NECAB1	2.2483	5.10849	5.17346	3.6905	2.17885	3.74517	2.16776	2.11609	2.08844	1.98542	2.08463	2.16979
671_at	0.0488	0.00705	3.24081	-2.65508	3.30709	671	bactericidal/permeability-increasing protein	BPI	7.5178	9.15095	10.2413	11.0265	4.43128	7.55624	6.43048	2.97134	4.46643	4.26192	6.51473	5.43663
10912_at	0.0489	0.00707	3.23961	-2.65727	1.09608	10912	growth arrest and DNA-damage-inducible, gamma	GADD45G	3.90321	3.32994	3.79901	5.61101	4.94315	3.50175	3.07959	3.14022	3.06201	3.00069	2.99583	3.23322
84290_at	0.049	0.00711	3.23614	-2.66357	1.06282	84290	calpain, small subunit 2	CAPNS2	5.21064	3.56284	4.45338	4.7078	6.01672	4.92788	3.39311	3.81629	4.33075	3.74798	3.56756	3.64666
57185_at	0.049	0.00713	-3.23468	-2.66623	-1.2831	57185	NIPA-like domain containing 3	NIPAL3	6.02578	6.98678	6.40532	5.96292	6.97088	4.19893	7.54613	7.32799	7.67829	7.41995	6.90457	7.37229
915_at	0.0493	0.00718	-3.23136	-2.67225	-2.21667	915	CD3d molecule, delta (CD3-TCR complex)	CD3D	8.2952	9.89124	9.1801	6.51799	9.602	5.35832	10.7577	10.2991	10.4644	10.1342	10.2544	10.2351
51338_at	0.0493	0.00719	3.23058	-2.67367	1.66555	51338	membrane-spanning 4-domains, subfamily A, member 4A	MS4A4A	4.21979	5.6503	7.71751	5.94094	3.94568	5.78674	4.1819	3.89872	3.49092	3.8255	3.82226	4.04835
8972_at	0.0493	0.00721	3.22936	-2.6759	1.1912	8972	maltase-glucoamylase (alpha-glucosidase)	MGAM	8.92062	9.79482	9.78738	9.05213	9.04572	9.45185	6.61271	8.69923	8.33167	9.27259	7.7906	8.19852
3575_at	0.0494	0.00722	-3.22806	-2.67825	-3.32483	3575	interleukin 7 receptor	IL7R	7.18049	9.34085	8.77538	5.41788	9.43732	2.43356	10.5941	10.6846	10.5497	10.2657	9.98317	10.4572
115352_at	0.0497	0.00729	-3.22295	-2.68755	-1.34073	115352	Fc receptor-like 3	FCRL3	4.46931	6.46431	6.3149	4.06438	5.18991	4.11732	6.36473	6.88045	6.5603	6.01497	6.5029	6.34115
90273_at	0.0503	0.00742	3.21367	-2.7044	1.07329	90273	carcinoembryonic antigen-related cell adhesion molecule 21	CEACAM21	5.33211	6.2109	6.89255	7.22096	6.76886	5.37259	4.77413	5.47272	5.29368	5.4111	4.73398	5.67259
84058_at	0.0508	0.00751	-3.2072	-2.71616	-1.11567	84058	WD repeat domain 54	WDR54	4.90052	6.4667	6.16079	4.47693	5.90419	4.55057	7.04007	6.51171	6.53366	6.21142	6.16834	6.68852
7280_at	0.051	0.00756	-3.20366	-2.72259	-2.50475	7280	tubulin, beta 2A class IIa	TUBB2A	6.29795	5.79851	6.12687	5.23733	4.08759	5.32419	9.62522	7.70992	5.22046	8.28653	6.56664	10.4921
64919_at	0.051	0.00757	-3.20282	-2.72411	-2.72305	64919	B-cell CLL/lymphoma 11B (zinc finger protein)	BCL11B	6.954	8.68969	7.91461	5.09939	8.3634	2.85314	9.75113	9.40385	9.67647	9.20612	9.09787	9.07707
646424_at	0.0512	0.0076	3.20052	-2.72829	1.00309	646424	serine peptidase inhibitor, Kazal type 8 (putative)	SPINK8	3.07707	3.83136	3.51745	5.17031	2.92669	3.93083	2.40292	2.74222	2.5735	3.03284	2.83908	2.8446
10326_at	0.0514	0.00764	3.19749	-2.7338	2.91548	10326	signal-regulatory protein beta 1	SIRPB1	7.21599	6.67521	7.16352	8.01443	2.72736	7.56744	5.43738	5.7283	2.56932	2.76808	2.69008	2.67794
131540_at	0.0514	0.00765	3.19703	-2.73463	2.37873	131540	zinc finger, DHHC-type containing 19	ZDHHC19	3.52724	7.59052	8.70014	4.9535	4.28196	6.01445	3.58717	3.30199	3.36617	3.61764	3.3762	3.54624
1053_at	0.0514	0.00766	3.19647	-2.73565	1.65399	1053	CCAAT/enhancer binding protein (C/EBP), epsilon	CEBPE	6.14345	4.61699	6.55061	7.58387	6.65692	4.41257	4.13413	4.58002	3.7489	3.95153	5.47016	4.15569
23596_at	0.0525	0.00788	-3.18094	-2.76385	-1.18829	23596	opsin 3	OPN3	6.0021	5.50592	5.84617	6.50795	4.59742	7.29641	7.81116	7.11808	7.39214	6.70036	6.82553	7.03842
825_at	0.0526	0.00792	3.17844	-2.76838	1.11687	825	calpain 3, (p94)	CAPN3	4.27804	4.367	5.62651	5.72018	3.94535	5.90453	3.31517	4.00638	4.05876	3.67957	3.73569	4.34482
10871_at	0.0526	0.00793	3.17786	-2.76944	1.19832	10871	CD300c molecule	CD300C	4.77321	4.68404	5.79466	5.79615	3.57053	5.87687	3.56276	3.73945	3.57239	3.96215	4.68989	3.77889
10125_at	0.0528	0.00796	-3.17547	-2.77378	-1.55006	10125	RAS guanyl releasing protein 1 (calcium and DAG-regulated)	RASGRP1	5.24955	6.78696	6.09929	4.42751	6.31373	3.3701	6.74774	7.05747	7.19985	6.85432	6.65848	7.02961
114907_at	0.0532	0.00804	-3.17022	-2.78331	-1.22159	114907	F-box protein 32	FBXO32	3.96912	4.99812	4.49443	3.22124	3.90097	2.23539	5.4494	5.19469	5.19762	4.48014	4.95154	4.87541
4050_at	0.0537	0.00816	-3.1621	-2.79805	-1.11824	4050	lymphotoxin beta (TNF superfamily, member 3)	LTB	9.32225	9.30522	8.50991	9.27928	10.9283	8.47269	10.6127	10.864	10.4875	10.3636	9.94299	10.2564
58191_at	0.0539	0.00821	3.1593	-2.80314	1.3042	58191	chemokine (C-X-C motif) ligand 16	CXCL16	7.00317	6.57582	6.39882	8.92397	7.8406	8.40935	6.44749	6.11935	5.94323	6.86354	6.24378	5.70914
219285_at	0.0541	0.00824	3.15737	-2.80664	1.04574	219285	sterile alpha motif domain containing 9-like	SAMD9L	5.96839	6.43026	6.38471	6.13424	7.88055	5.92522	4.65431	5.83909	5.92617	5.71598	5.13258	5.18083
64757_at	0.0545	0.00831	3.15259	-2.81532	1.0326	64757	mitochondrial amidoxime reducing component 1	MTARC1	7.55657	8.58789	9.07897	8.15056	7.03795	7.87447	6.95978	7.05672	7.63756	7.44593	6.35237	6.63847
28755_at	0.0545	0.00833	-3.15144	-2.8174	-2.50475	28755	T cell receptor alpha constant		8.10234	9.80308	8.9166	6.13691	9.56677	4.45788	10.7575	10.2554	10.4957	10.0525	10.1056	10.3454
256236_at	0.0545	0.00834	-3.15082	-2.81852	-1.39145	256236	napsin B aspartic peptidase, pseudogene		7.30861	5.24213	4.93259	7.02147	5.08895	6.90087	7.36066	7.76683	7.70995	6.69836	7.43941	7.86815
2113_at	0.0553	0.00849	-3.14108	-2.8362	-1.21622	2113	v-ets avian erythroblastosis virus E26 oncogene homolog 1	ETS1	3.883	4.98396	4.60583	3.57497	4.72059	2.23907	5.23112	5.48947	5.31673	5.3077	4.97478	4.98493
93058_at	0.0557	0.00856	-3.13639	-2.84471	-1.28613	93058	coenzyme Q10 homolog A (S. cerevisiae)	COQ10A	3.22486	4.94154	4.89152	3.27199	3.45435	2.71528	5.67361	5.1077	5.42822	4.36344	4.31273	5.33061
11326_at	0.0565	0.00874	3.12555	-2.86437	2.75586	11326	V-set and immunoglobulin domain containing 4	VSIG4	2.94778	6.28318	6.96595	6.14667	2.86369	8.82252	3.33759	3.22283	2.87289	2.55562	2.89756	2.60813
79153_at	0.0568	0.00885	3.11891	-2.87641	1.16941	79153	glycerophosphodiester phosphodiesterase domain containing 3	GDPD3	4.76193	3.78848	4.02618	3.99739	5.69076	4.72454	2.52446	3.82782	3.92384	3.10468	2.52309	4.06896
22898_at	0.057	0.00889	3.11633	-2.8811	1.05752	22898	DENN/MADD domain containing 3	DENND3	8.2656	7.27354	7.52803	7.41208	8.86775	7.87976	5.51704	7.19387	7.09754	7.28395	6.64489	7.14436
713_at	0.0573	0.00896	3.11238	-2.88827	1.53307	713	complement component 1, q subcomponent, B chain	C1QB	2.41263	3.90242	5.22345	4.93355	3.41035	5.84579	3.29591	2.98867	2.43266	2.62803	2.47721	2.70729
51733_at	0.0573	0.00897	3.11158	-2.88971	1.18316	51733	ureidopropionase, beta	UPB1	2.84419	4.06118	5.41344	3.62308	4.69919	3.00684	2.9114	2.72184	2.64332	2.81802	3.03097	2.42343
5005_at	0.06	0.00957	3.07672	-2.95288	1.33837	5005	orosomucoid 2	ORM2	3.4366	4.41611	4.56021	5.52631	2.22946	3.28521	2.55045	2.45716	2.52435	2.73735	2.58325	2.57114
4353_at	0.0602	0.00961	3.0746	-2.95672	2.718	4353	myeloperoxidase	MPO	5.13347	6.39988	8.45242	9.62961	3.5601	6.54936	3.54093	2.98893	3.41089	3.37827	5.05175	5.04607
5806_at	0.0602	0.00962	3.07381	-2.95816	1.49496	5806	pentraxin 3, long	PTX3	3.21401	4.43097	5.39875	6.14752	2.81592	4.01835	3.11557	2.88826	2.75592	2.65452	3.18853	2.45297
28978_at	0.0609	0.0098	-3.06373	-2.9764	-1.3892	28978	transmembrane protein 14A	TMEM14A	4.24637	5.59251	4.48034	3.41872	4.87461	2.24848	6.13357	5.54629	5.38243	5.25011	5.37134	5.5125
660_at	0.0609	0.00981	3.06327	-2.97723	2.13619	660	BMX non-receptor tyrosine kinase	BMX	4.73059	7.60288	8.31691	6.83457	4.16753	5.57743	3.21368	3.60867	4.05236	5.77974	3.99102	3.76728
28638_at	0.0612	0.00987	-3.05997	-2.98321	-2.23798	28638	T cell receptor beta constant 2		10.3075	11.7428	10.946	8.53895	11.3239	6.6572	12.3828	12.1825	12.2898	11.8939	11.9295	12.2658
2992_at	0.0612	0.00989	3.05919	-2.98463	1.70505	2992	glycogenin 1	GYG1	7.54666	10.5183	10.7217	10.0238	7.45589	9.358	8.19264	7.70559	7.57704	7.45153	7.17245	7.29478
11240_at	0.0613	0.0099	3.0583	-2.98623	1.08961	11240	peptidyl arginine deiminase, type II	PADI2	6.44652	5.80699	6.01929	6.3394	7.15373	5.79323	4.44613	4.21261	5.43914	6.46652	5.2695	5.18758
3738_at	0.0619	0.01	-3.05077	-2.99986	-1.42747	3738	potassium voltage-gated channel, shaker-related subfamily, member 3	KCNA3	6.03524	7.43806	6.73151	4.50834	6.30829	4.38565	7.42797	7.50463	7.73349	7.03122	7.07626	7.19832
4068_at	0.0623	0.0101	-3.04538	-3.00961	-1.54453	4068	SH2 domain containing 1A	SH2D1A	4.86531	6.95754	6.16585	4.91049	5.52075	3.15398	7.47028	6.85872	6.94438	6.36327	6.56769	6.63679
284406_at	0.0625	0.0102	-3.04202	-3.0157	-1.14881	284406	ZFP82 zinc finger protein	ZFP82	4.1972	5.154	4.2826	3.07672	4.68279	3.42418	6.16666	5.06022	5.6916	4.79523	4.40485	5.5918
23531_at	0.0626	0.0102	-3.03996	-3.01942	-1.85069	23531	monocyte to macrophage differentiation-associated	MMD	7.61466	4.56909	5.37871	5.23982	3.2754	3.83678	7.49844	6.57328	5.80557	6.85357	7.22344	7.06433
2791_at	0.0648	0.0107	-3.01533	-3.06396	-2.36081	2791	guanine nucleotide binding protein (G protein), gamma 11	GNG11	10.4708	6.7357	7.42729	8.34709	4.99824	5.22615	10.2357	9.42787	8.82532	9.72116	9.53297	9.62711
50852_at	0.0648	0.0107	-3.015	-3.06456	-2.41166	50852	T cell receptor associated transmembrane adaptor 1	TRAT1	5.79075	7.35263	6.60518	3.63575	7.4998	2.27659	8.35435	8.1502	7.78962	7.51492	7.81431	8.00724
64101_at	0.0648	0.0108	3.01411	-3.06616	1.10949	64101	leucine rich repeat containing 4	LRRC4	6.49756	6.19591	5.88861	6.59662	7.21051	6.12445	3.93504	5.47392	5.45785	6.6126	5.39666	4.98068
353345_at	0.0651	0.0108	3.01095	-3.07188	1.64407	353345	G protein-coupled receptor 141	GPR141	3.84645	6.47339	6.64534	6.43422	3.34495	5.38092	3.99893	3.79232	3.54286	3.97471	3.5481	3.40393
3494_at	0.0653	0.0109	-3.00835	-3.07657	-1.84328	3494	immunoglobulin heavy constant alpha 2 (A2m marker)		6.74916	5.71086	5.99675	5.65102	5.31698	5.49361	7.05257	8.09449	10.6092	6.72061	6.29879	7.20242
399_at	0.0658	0.011	-3.00194	-3.08815	-2.05855	399	ras homolog family member H	RHOH	6.27517	7.86859	7.68302	5.91264	7.71707	3.20226	9.19551	8.45359	8.77709	8.01097	8.18889	8.38399
54512_at	0.0658	0.011	3.0019	-3.08823	1.39833	54512	exosome component 4	EXOSC4	5.77107	8.27754	8.72442	6.69513	5.90973	6.77547	6.03711	5.83268	5.43855	5.37304	5.5962	5.4858
9452_at	0.0664	0.0111	-2.99509	-3.10053	-1.98378	9452	integral membrane protein 2A	ITM2A	7.64333	8.23693	7.71355	5.19706	8.19328	4.25358	9.76223	8.43812	8.61184	8.81909	9.00725	8.50188
7357_at	0.0696	0.0119	2.95972	-3.16435	1.25091	7357	UDP-glucose ceramide glucosyltransferase	UGCG	7.07132	8.80279	9.62806	9.36336	7.22707	7.88269	7.43453	7.246	7.07935	6.85633	6.64078	7.21287
389289_at	0.0709	0.0122	-2.94578	-3.18948	-1.27053	389289	annexin A2 receptor	ANXA2R	5.84213	7.45752	7.30589	5.56118	7.15154	4.77815	8.16346	7.50529	7.70369	7.41499	7.22178	7.71039
3778_at	0.071	0.0122	2.94448	-3.19183	1.02748	3778	potassium large conductance calcium-activated channel, subfamily M, alpha member 1	KCNMA1	2.1908	3.13971	3.18224	4.732	2.29075	3.52991	2.11787	2.16818	2.02501	2.14493	2.28946	2.15505
28797_at	0.0731	0.0127	-2.92458	-3.22766	-1.08709	28797	immunoglobulin lambda variable 3-19		2.64957	2.50666	2.26619	2.31849	2.17408	2.37051	3.63075	3.37762	5.314	2.78587	2.61451	3.08532
338339_at	0.0747	0.0131	2.90835	-3.25688	1.554	338339	C-type lectin domain family 4, member D	CLEC4D	6.74324	9.03839	9.59469	8.28458	6.4613	6.98219	6.80444	5.98461	5.3932	7.01636	6.22912	6.35266
2625_at	0.0752	0.0132	-2.90367	-3.26529	-1.32284	2625	GATA binding protein 3	GATA3	4.37072	6.02745	5.5023	4.00755	5.74131	2.89647	6.14824	6.28384	6.14219	5.97842	5.82861	6.10151
55314_at	0.0757	0.0134	2.89737	-3.27663	1.05583	55314	transmembrane protein 144	TMEM144	2.96299	3.15387	3.68604	4.88999	2.80774	4.91429	2.48301	2.72783	3.01523	2.43636	2.68209	2.73542
200931_at	0.0757	0.0134	2.89724	-3.27686	1.28425	200931	solute carrier family 51, alpha subunit	SLC51A	3.22456	4.3767	6.11144	4.42444	3.02447	3.20063	2.5746	2.70703	2.84823	2.72283	2.89501	2.90907
1803_at	0.0759	0.0134	-2.89378	-3.28307	-1.58088	1803	dipeptidyl-peptidase 4	DPP4	3.98926	6.20272	5.20893	3.69641	5.9123	2.59273	6.43933	6.60237	6.29958	5.75563	5.59066	6.40006
4070_at	0.0766	0.0136	2.88726	-3.29479	1.4673	4070	tumor-associated calcium signal transducer 2	TACSTD2	3.52601	4.67289	5.68927	6.08986	3.30079	3.69444	2.71632	2.76958	2.53657	2.87796	4.37425	2.89479
3248_at	0.0782	0.0141	2.87013	-3.32556	1.52823	3248	hydroxyprostaglandin dehydrogenase 15-(NAD)	HPGD	3.0408	6.18803	6.14457	4.0809	3.13427	3.88183	3.02881	3.07465	2.73135	2.91662	2.69743	2.85213
26577_at	0.0782	0.0141	2.86999	-3.3258	1.6694	26577	procollagen C-endopeptidase enhancer 2	PCOLCE2	2.85313	4.68865	6.49859	4.24196	2.6839	2.48247	2.27202	2.04692	2.2115	2.15827	2.38431	2.35928
1308_at	0.0793	0.0144	2.8588	-3.34588	2.4072	1308	collagen, type XVII, alpha 1	COL17A1	3.26217	5.45445	7.02609	8.17548	2.44294	3.89257	2.83395	2.34339	2.4649	2.39134	2.77642	3.00051
6590_at	0.0798	0.0145	2.85455	-3.35351	1.70887	6590	secretory leukocyte peptidase inhibitor	SLPI	8.29371	7.02712	7.72886	10.187	10.2174	9.04568	6.22621	7.41646	6.41991	8.7042	7.06871	6.41112
27018_at	0.0809	0.0148	-2.84183	-3.37631	-1.45995	27018	nerve growth factor receptor (TNFRSF16) associated protein 1	BEX3	10.2237	7.92847	8.24589	8.71334	7.75501	6.19172	10.2854	9.25006	9.28461	9.40124	9.85038	9.74616
5468_at	0.0812	0.0149	2.83914	-3.38114	1.51387	5468	peroxisome proliferator-activated receptor gamma	PPARG	2.19914	4.85357	5.61909	2.99173	2.49461	4.7145	2.25346	2.33277	2.35166	2.29116	2.39109	2.1693
28526_at	0.0812	0.0149	-2.83894	-3.38149	-1.66486	28526	T cell receptor delta constant		5.41045	8.22612	7.70187	7.49977	5.03691	4.72374	8.57239	8.09145	7.90949	8.36122	7.81188	7.84161
6095_at	0.0814	0.015	-2.83635	-3.38614	-1.54153	6095	RAR-related orphan receptor A	RORA	4.65354	6.45394	5.8343	4.43168	6.17094	2.61418	6.84273	6.75313	6.67548	6.17321	6.45642	6.50677
5273_at	0.0816	0.015	2.83434	-3.38973	1.84905	5273	serpin peptidase inhibitor, clade B (ovalbumin), member 10	SERPINB10	3.85239	4.46528	6.18248	6.69916	2.2681	3.0868	2.49752	2.21303	2.56449	2.5655	2.92174	2.69761
285590_at	0.0817	0.0151	2.8329	-3.39232	1.34388	285590	SH3 and PX domains 2B	SH3PXD2B	2.48602	3.72898	4.973	4.36725	2.3073	5.19736	2.24131	2.31033	2.75717	2.40963	2.99378	2.28441
91523_at	0.0818	0.0151	-2.83012	-3.39728	-1.74442	91523	PC-esterase domain containing 1B	PCED1B	6.11438	7.41696	6.89791	4.79014	7.35146	3.27752	7.91418	7.59397	7.86013	7.48111	7.75433	7.71119
3212_at	0.0822	0.0152	-2.82663	-3.40353	-1.13712	3212	homeobox B2	HOXB2	3.9405	4.70777	5.0652	5.25934	5.33864	5.10376	4.3742	5.87865	6.63053	5.73085	6.82194	6.80175
4118_at	0.0826	0.0153	-2.82347	-3.4092	-2.01398	4118	mal, T-cell differentiation protein	MAL	7.29095	7.55884	7.10736	5.06698	8.35705	3.31727	9.04023	8.54084	8.25775	8.16361	8.6076	8.17227
123036_at	0.0831	0.0155	-2.81775	-3.41943	-1.57805	123036	tandem C2 domains, nuclear	TC2N	5.46161	6.09696	5.40584	4.22194	5.32706	2.04278	6.97875	6.39919	6.17441	6.00925	6.20316	6.25976
51466_at	0.0835	0.0156	-2.81322	-3.42754	-1.09217	51466	Enah/Vasp-like	EVL	6.19047	7.62628	7.04908	6.03881	6.92761	4.74814	7.55166	7.64757	7.73955	7.12099	7.36738	7.70628
10924_at	0.0845	0.0159	2.8037	-3.44456	1.34484	10924	sphingomyelin phosphodiesterase, acid-like 3A	SMPDL3A	6.88142	8.06294	9.14146	8.28335	5.5583	7.13209	6.2695	6.26918	5.75053	5.98056	6.23434	6.48641
27240_at	0.0865	0.0164	-2.78636	-3.47554	-1.58116	27240	signaling threshold regulating transmembrane adaptor 1	SIT1	6.23023	8.12874	7.19713	5.22814	7.6984	4.37616	8.77645	7.90876	8.1413	7.69708	8.10505	7.71714
5583_at	0.0885	0.0169	-2.77122	-3.50256	-1.35259	5583	protein kinase C, eta	PRKCH	7.12971	9.14462	8.52031	6.94867	8.24212	5.57629	9.04291	9.13614	8.90971	8.68108	8.81317	9.09428
5196_at	0.089	0.017	-2.76734	-3.50948	-1.69722	5196	platelet factor 4	PF4	11.1342	8.98147	9.86423	9.58104	6.40648	8.33592	11.0261	10.2835	10.256	10.9606	11.1225	10.8382
1991_at	0.0901	0.0173	2.75797	-3.52617	2.49787	1991	elastase, neutrophil expressed	ELANE	4.35891	5.29808	7.23764	9.21018	2.45012	5.89634	3.76942	2.64939	2.76667	2.50759	3.66882	4.10215
3108_at	0.0911	0.0176	-2.74993	-3.54049	-1.14003	3108	major histocompatibility complex, class II, DM alpha		7.53755	7.00574	6.20198	9.07906	6.93451	8.59023	9.01627	8.79737	8.78007	8.38398	8.58065	8.63089
8357_at	0.0911	0.0176	-2.74973	-3.54085	-1.61691	8357	histone cluster 1, H3h		7.58628	5.85761	6.25054	6.56129	4.43618	3.86492	8.29277	6.71713	6.42538	7.04239	8.02162	7.759
375061_at	0.0913	0.0176	2.7485	-3.54305	1.75673	375061	family with sequence similarity 89, member A	FAM89A	2.80363	6.34969	6.81301	4.53341	3.03669	5.72285	3.52238	3.1242	2.96792	2.85881	3.1289	3.11673
57616_at	0.092	0.0178	2.74237	-3.55395	1.25063	57616	teashirt zinc finger homeobox 3	TSHZ3	4.63961	6.49893	6.98429	5.79611	4.84122	6.34509	3.60086	4.88927	4.40386	5.86135	4.76781	4.07832
50861_at	0.0923	0.0179	-2.73987	-3.55841	-1.35543	50861	stathmin-like 3	STMN3	5.84084	6.57448	6.5287	4.26144	6.49296	3.7629	6.91436	6.96168	7.22214	6.74865	6.23306	7.51401
1118_at	0.0935	0.0182	2.73098	-3.57421	1.97234	1118	chitinase 1 (chitotriosidase)	CHIT1	2.76409	3.25667	5.42573	7.49629	2.48859	5.02987	2.34417	2.41768	2.62095	2.28731	2.35657	2.60051
917_at	0.095	0.0186	-2.71862	-3.59619	-2.11385	917	CD3g molecule, gamma (CD3-TCR complex)	CD3G	5.85136	7.74514	7.3191	3.60949	7.85688	3.25007	8.35785	7.67354	8.10795	8.02926	7.98636	8.16014
56670_at	0.0952	0.0187	2.7161	-3.60066	1.56054	56670	succinate receptor 1	SUCNR1	6.16594	4.38759	6.04407	6.32456	4.57478	2.96187	4.38634	2.54866	2.81581	3.16239	4.16207	4.02028
10225_at	0.0964	0.019	-2.70682	-3.61713	-1.47269	10225	CD96 molecule	CD96	4.4892	6.77174	6.22766	4.76215	6.14229	2.88949	6.5939	6.78686	6.62805	6.64123	6.45982	7.00885
56253_at	0.0987	0.0196	-2.68968	-3.64753	-1.08156	56253	cytotoxic and regulatory T cell molecule	CRTAM	4.07317	5.80324	4.83154	4.8518	3.27321	3.10461	5.4639	5.51035	5.63011	4.8517	5.3928	5.57804
387357_at	0.0988	0.0197	-2.6877	-3.65103	-1.66321	387357	thymocyte selection associated	THEMIS	3.6044	6.37105	5.47921	2.75174	4.68724	2.17627	6.39776	5.81197	6.0603	5.67289	5.35194	5.75433
27040_at	0.102	0.0208	-2.65929	-3.70132	-1.3908	27040	linker for activation of T cells	LAT	7.02695	7.81724	7.29257	5.22909	7.23025	4.35188	8.28948	7.52601	8.07272	7.64164	7.7671	7.99583
3934_at	0.103	0.021	2.65266	-3.71303	2.46682	3934	lipocalin 2	LCN2	8.83326	10.59	12.0242	12.3152	5.83681	9.67464	8.55745	6.89276	7.19289	6.49771	7.51219	7.82011
5588_at	0.104	0.0212	-2.64876	-3.71991	-1.39941	5588	protein kinase C, theta	PRKCQ	5.02092	6.41838	5.65047	3.72336	5.68572	2.70927	6.45527	6.43368	6.12516	5.93947	6.05811	6.59288
27439_at	0.108	0.0223	2.62149	-3.76801	1.03615	27439	cat eye syndrome chromosome region, candidate 6	TMEM121B	6.52792	4.73701	4.17757	5.69764	6.01485	6.64948	4.64055	4.21708	5.17743	4.7688	4.59228	4.19144
55301_at	0.108	0.0223	2.6213	-3.76833	1.87192	55301	oleoyl-ACP hydrolase	OLAH	2.15758	5.59024	5.40295	2.185	2.08073	5.87982	2.06192	2.00294	2.01476	1.96543	2.12284	1.89693
79961_at	0.109	0.0227	-2.61152	-3.78556	-1.1874	79961	DENN/MADD domain containing 2D	DENND2D	7.94031	9.78242	9.32267	7.92553	8.6018	6.52607	9.91405	9.53292	9.82569	9.41888	8.8898	9.64183
11118_at	0.109	0.0227	-2.61056	-3.78724	-1.12192	11118	butyrophilin, subfamily 3, member A2	BTN3A2	8.63838	8.9695	8.52352	8.32438	6.10733	7.03587	9.01688	9.37483	9.20735	8.69173	8.7582	9.28152
133418_at	0.11	0.0229	2.60585	-3.79552	1.02197	133418	embigin	EMB	6.12236	7.84798	8.17831	8.29561	6.31199	6.25855	6.39435	6.14701	6.16522	6.09826	6.03645	6.04172
274_at	0.11	0.0231	-2.60247	-3.80147	-1.28583	274	bridging integrator 1	BIN1	6.07892	8.14983	7.59515	5.3609	7.18126	4.86113	8.03302	8.0059	7.867	7.45929	7.74921	7.82774
55911_at	0.111	0.0232	2.59923	-3.80717	1.16829	55911	apolipoprotein B receptor	APOBR	6.03557	5.51774	5.29195	7.05551	8.20124	6.94404	4.95152	5.66603	5.19988	6.1663	5.16718	4.88538
28951_at	0.111	0.0232	-2.59846	-3.80852	-1.4407	28951	tribbles pseudokinase 2	TRIB2	4.92814	7.03393	6.76665	4.54866	7.07015	3.89767	7.12343	7.46206	7.52325	6.67255	6.51002	7.59809
5920_at	0.112	0.0237	-2.5889	-3.82531	-1.10672	5920	retinoic acid receptor responder (tazarotene induced) 3	PLAAT4	7.53562	9.15917	8.37942	7.86848	8.4716	5.92324	9.49505	8.90669	9.08911	8.79462	8.7929	8.89947
10855_at	0.114	0.0241	2.57838	-3.84377	1.19861	10855	heparanase	HPSE	7.17728	6.89576	6.5459	9.40332	7.12881	8.64094	6.47354	6.55384	6.41225	7.30944	6.15689	5.69437
1901_at	0.114	0.0242	-2.5759	-3.84811	-1.71906	1901	sphingosine-1-phosphate receptor 1	S1PR1	6.26009	8.54129	8.50801	5.36673	7.35052	4.15389	8.92109	8.61277	8.41547	8.13606	8.10006	8.30944
56729_at	0.116	0.0249	2.56059	-3.87492	3.10457	56729	resistin	RETN	6.96827	11.2181	12.4163	11.2307	3.83947	9.42165	5.76398	5.90189	6.41164	5.61188	6.54588	6.23189
8631_at	0.117	0.0252	-2.55522	-3.88432	-1.70219	8631	src kinase associated phosphoprotein 1	SKAP1	5.72804	7.71973	7.17413	5.23666	6.69772	2.80746	7.91684	7.62431	7.66176	7.13639	7.48263	7.75496
79037_at	0.117	0.0254	-2.55086	-3.89194	-1.63898	79037	poliovirus receptor related immunoglobulin domain containing	PVRIG	6.83443	9.84756	9.27065	7.30297	8.69714	5.35278	10.1438	9.35047	9.56927	9.18197	9.36355	9.53036
6285_at	0.118	0.0255	-2.54775	-3.89739	-1.36183	6285	S100 calcium binding protein B	S100B	3.01925	3.24926	3.35661	3.84652	3.11733	3.24326	6.48512	3.06229	5.94445	5.11802	3.35201	4.0413
100129827_at	0.119	0.026	2.53681	-3.91649	1.07035	100129827	MRVI1 antisense RNA 1		4.26965	3.73119	4.23423	3.06501	6.00005	3.50948	2.73697	2.67719	2.92578	3.83502	2.72566	3.48691
3932_at	0.12	0.0262	-2.53426	-3.92095	-1.85198	3932	LCK proto-oncogene, Src family tyrosine kinase	LCK	6.59936	8.96685	8.31628	5.73781	8.13552	3.83683	9.28675	8.6506	9.02269	8.47011	8.38344	8.89097
919_at	0.123	0.0273	-2.51216	-3.95946	-1.69312	919	CD247 molecule	CD247	6.03686	8.79711	8.15974	6.52592	7.34876	3.79114	9.00807	8.467	8.50006	8.38423	8.02959	8.42926
5004_at	0.128	0.0292	2.47469	-4.02454	2.43513	5004	orosomucoid 1	ORM1	6.88934	8.7215	8.50425	10.0733	4.94785	9.56161	5.15217	3.03497	5.71442	8.66568	5.16339	6.35644
9365_at	0.129	0.0292	2.47365	-4.02633	1.21394	9365	klotho	KL	3.12885	5.27664	5.7666	3.23261	2.69802	3.28025	3.07685	2.51693	2.25204	2.77248	2.79129	2.68973
10681_at	0.132	0.0305	-2.451	-4.06553	-1.01988	10681	guanine nucleotide binding protein (G protein), beta 5	GNB5	6.04308	4.54632	4.06473	3.75655	3.56737	2.98559	5.7913	4.90092	5.17791	5.20513	5.20547	4.80221
5208_at	0.136	0.0319	2.42689	-4.10712	1.51339	5208	6-phosphofructo-2-kinase/fructose-2,6-biphosphatase 2	PFKFB2	3.23826	6.2518	6.92721	3.99528	3.15653	3.36532	2.8715	3.00005	2.99991	3.13246	3.06568	2.78449
3957_at	0.136	0.0319	-2.42679	-4.10728	-1.50328	3957	lectin, galactoside-binding, soluble, 2	LGALS2	4.59754	5.6438	4.76955	8.50773	5.83143	5.30017	8.13272	6.0323	6.57631	8.1339	7.12594	7.66873
4638_at	0.137	0.0323	-2.42007	-4.11885	-1.51693	4638	myosin light chain kinase	MYLK	7.54988	4.27909	4.82695	4.58398	3.02228	3.65068	6.87329	6.16414	5.06343	6.24278	6.57566	6.09517
4496_at	0.14	0.0331	2.40636	-4.14241	1.14141	4496	metallothionein 1H	MT1H	2.1889	3.5344	3.32981	2.96793	2.16455	5.59343	2.00272	2.24839	1.99069	2.29179	2.06923	2.32773
3045_at	0.141	0.0336	2.39739	-4.15781	1.22684	3045	hemoglobin, delta	HBD	6.37792	5.68004	6.03116	5.1341	5.82097	3.53462	4.92344	2.84009	4.13454	3.71038	5.47279	4.13653
5790_at	0.143	0.0342	-2.3888	-4.17254	-1.56464	5790	protein tyrosine phosphatase, receptor type, C-associated protein	PTPRCAP	5.14426	8.14305	7.21126	4.82134	6.7776	3.54224	8.1253	7.39357	7.61351	7.2955	7.09135	7.50833
10857_at	0.143	0.0345	-2.3835	-4.18162	-1.09258	10857	progesterone receptor membrane component 1	PGRMC1	8.53341	6.38258	6.87529	7.26879	5.09777	6.08956	8.39571	7.49286	7.25266	7.89884	7.87054	7.89226
4211_at	0.145	0.0352	-2.37285	-4.19982	-1.01991	4211	Meis homeobox 1	MEIS1	5.15435	2.48903	2.84103	2.63919	2.49039	2.49927	4.07199	3.74876	3.42835	3.86491	4.47037	4.64834
54843_at	0.146	0.0353	-2.37047	-4.20389	-1.17223	54843	synaptotagmin-like 2	SYTL2	3.79871	6.21534	5.15262	3.84033	4.26974	2.43481	5.66267	5.95012	5.25542	5.21942	5.23326	5.42407
566_at	0.148	0.0361	2.3587	-4.22398	1.22527	566	azurocidin 1	AZU1	2.86933	3.08825	4.63633	6.01979	2.46621	2.87149	2.46527	2.21518	2.40306	2.33317	2.42821	2.75486
7045_at	0.148	0.0361	-2.35831	-4.22465	-1.27665	7045	transforming growth factor, beta-induced, 68kDa	TGFBI	8.81702	6.56003	6.44022	9.06233	5.96432	8.69206	8.399	9.31044	8.90122	8.52926	8.91617	9.13981
10804_at	0.149	0.0365	2.35195	-4.23549	1.0657	10804	gap junction protein, beta 6, 30kDa	GJB6	2.29865	4.28602	4.82405	4.22716	2.14432	2.52676	2.76433	2.07466	2.27166	2.42599	2.17829	2.19784
8530_at	0.149	0.0365	2.35179	-4.23577	1.27417	8530	cystatin F (leukocystatin)	CST7	7.73184	11.4805	11.5779	10.1699	9.98897	10.3199	9.11381	8.48562	8.71381	9.63897	8.9967	8.67498
9914_at	0.154	0.0383	2.3259	-4.27978	1.05805	9914	ATPase, Ca++ transporting, type 2C, member 2	ATP2C2	2.22054	2.81296	3.38711	5.57002	2.44554	3.19093	2.45001	2.06855	2.07281	2.26159	2.29537	2.13048
196410_at	0.154	0.0384	2.32405	-4.28293	1.2295	196410	methyltransferase like 7B	METTL7B	2.37557	2.21743	3.55584	5.16783	2.47538	5.30764	2.38302	2.24402	2.15558	2.25797	2.32124	2.36088
81579_at	0.158	0.0398	-2.30422	-4.31651	-1.01418	81579	phospholipase A2, group XIIA	PLA2G12A	6.3228	4.33566	4.62159	4.43494	3.47332	3.31429	5.98691	4.95717	4.9016	5.67511	5.88984	5.17701
7294_at	0.158	0.04	-2.3023	-4.31975	-1.28441	7294	TXK tyrosine kinase	TXK	4.84583	7.21703	6.87532	5.58907	5.91672	3.27662	7.23558	7.23058	7.10719	6.67406	6.16366	7.016
440603_at	0.16	0.0406	2.29385	-4.33404	1.00066	440603	BCL2-like 15	BCL2L15	2.67829	2.92381	4.07172	5.59207	2.6408	2.92636	2.38607	2.44696	2.40989	2.42113	2.58369	2.58135
9450_at	0.16	0.0408	-2.29135	-4.33825	-1.48254	9450	lymphocyte antigen 86	LY86	7.93076	6.10213	5.4266	9.07427	5.30997	8.82865	8.64475	8.8102	8.36025	8.15596	9.02117	8.57526
2335_at	0.161	0.0411	2.2868	-4.34593	1.18651	2335	fibronectin 1	FN1	2.17758	3.73284	3.0106	3.15577	2.18856	5.92173	2.29536	2.11116	2.16783	2.22065	2.16312	2.10989
63933_at	0.166	0.0431	-2.2601	-4.39085	-1.03787	63933	mitochondrial calcium uniporter regulator 1	MCUR1	8.1072	6.23896	6.55035	6.47274	4.53403	5.96683	8.0156	6.81749	7.00716	7.16481	7.61223	7.48005
3560_at	0.167	0.0435	-2.25585	-4.39798	-1.1072	3560	interleukin 2 receptor, beta	IL2RB	7.28916	10.0621	9.49456	9.21972	7.84557	7.02037	10.0246	9.85259	9.30564	9.10675	9.51829	9.76684
8654_at	0.167	0.0435	-2.25531	-4.39889	-1.04139	8654	phosphodiesterase 5A, cGMP-specific	PDE5A	6.14011	3.48334	3.87152	4.35757	3.06105	3.54159	5.73644	4.87044	4.37516	5.09658	5.82192	4.80299
6775_at	0.167	0.0437	-2.25274	-4.4032	-1.42893	6775	signal transducer and activator of transcription 4	STAT4	5.31992	7.59416	7.12892	5.42772	6.53128	2.93065	7.47817	7.52786	7.24738	6.85506	7.03028	7.36747
150165_at	0.169	0.0442	2.247	-4.41281	1.3536	150165	XK, Kell blood group complex subunit-related family, member 3	XKR3	3.2393	2.97573	3.05548	6.27773	5.52551	5.92949	2.70327	2.76775	3.80828	3.21893	3.18967	3.19375
83699_at	0.169	0.0442	-2.24644	-4.41375	-1.67027	83699	SH3 domain binding glutamate-rich protein like 2	SH3BGRL2	8.23878	4.55025	5.3546	5.99498	3.08979	3.59105	7.97423	6.14443	6.03383	6.76582	7.20598	6.71681
273_at	0.169	0.0446	2.24225	-4.42076	1.00401	273	amphiphysin	AMPH	2.4412	4.08482	4.35052	2.94121	2.82834	5.59242	2.46033	2.74852	2.6825	2.88882	2.64065	2.79358
1088_at	0.169	0.0446	2.24178	-4.42156	2.16609	1088	carcinoembryonic antigen-related cell adhesion molecule 8	CEACAM8	7.11971	7.54189	9.02065	10.8326	3.77605	7.71501	6.35899	3.82742	5.09822	4.74779	6.24722	6.72971
2040_at	0.173	0.0463	2.22158	-4.45529	1.28001	2040	stomatin	STOM	8.60073	9.50066	10.0717	9.69937	6.43262	7.12905	7.80227	7.00064	6.88635	6.87076	7.52485	7.66921
84519_at	0.174	0.0464	-2.21966	-4.45848	-1.49929	84519	acrosin binding protein	ACRBP	10.1174	7.22761	8.1555	8.36481	5.04986	6.89775	9.93984	8.67932	8.20275	9.39035	9.62288	8.97349
2205_at	0.175	0.0472	-2.20996	-4.47464	-2.72048	2205	Fc fragment of IgE, high affinity I, receptor for; alpha polypeptide	FCER1A	9.91621	3.58849	2.43425	6.07317	9.76109	3.73484	9.29	8.38718	8.10351	8.06045	9.28876	8.70104
26052_at	0.176	0.0477	-2.20471	-4.48338	-1.38748	26052	dynamin 3	DNM3	6.99502	3.99591	3.84654	4.59682	3.19026	2.47615	6.21278	5.10649	4.54875	6.17659	5.84139	5.53959
284415_at	0.177	0.0477	2.20434	-4.48398	1.19931	284415	V-set and transmembrane domain containing 1	VSTM1	8.03027	7.74015	8.9714	8.04285	8.05125	5.29769	6.29432	6.77007	6.57813	5.90869	7.77598	5.61055
2681_at	0.177	0.0479	-2.20257	-4.48693	-1.39036	2681	glycoprotein, alpha-galactosyltransferase 1 pseudogene		6.42631	3.84213	4.74939	7.02963	2.81206	5.77924	7.4865	6.0581	5.99031	6.39109	6.50128	6.55363
3082_at	0.179	0.0485	2.19544	-4.49876	1.1704	3082	hepatocyte growth factor (hepapoietin A; scatter factor)	HGF	2.83907	4.65305	6.23368	3.54049	2.68685	2.69235	2.73917	2.69139	2.58301	2.47776	2.7292	2.40256
9124_at	0.179	0.0486	-2.19362	-4.50179	-1.0206	9124	PDZ and LIM domain 1	PDLIM1	8.63494	6.99716	6.85925	6.60675	5.68969	5.42946	8.45207	7.05968	7.50794	7.56663	8.16506	7.58945
4603_at	0.182	0.0498	-2.18039	-4.5237	-1.27297	4603	v-myb avian myeloblastosis viral oncogene homolog-like 1	MYBL1	4.96643	7.14519	7.06101	5.56934	6.42202	3.08115	7.14489	7.22896	7.155	6.57375	6.70278	7.07756
